# Supplementary material
Source: PubMed Central journal article supplement (PMC2343579)

## SUPPLEMENTARY MATERIAL

**Supplementary Table 1.** Primer/probe sequences used for real-time PCR.

| Target  | Forward Primer             | Probe               | Reverse Primer                   |
|---------|----------------------------|---------------------|----------------------------------|
| MHC IIb | 5' TCAACAAGCTGCGGGTAA 3'   | AGCCGAGAGGTTACACA   | 5' TGAGCTATTCTTCGCTTATGACTTIG 3' |
| MHC IIx | 5' GCGAGGTTACACCAAAATCA 3' | AGCGAAGAGTGATCG     | 5' TGGTCACTTTCCTGCTTTGGA 3'      |
| Homer2  | 5' GGGCGGAGCCTAGATGGA 3'   | AGTGAAAAGCGTGTGTGAG | 5' AATGCCCTATGCCCACTTCA 3'       |

**Supplementary Table 2.** Probe sets with significant atrophy main effects after the Bonferroni adjustment. Probe sets are organized by putative functions in column 1. Column 2 is the accession number, column 3 is an unadjusted p-value where  $4 \times 10^{-6}$  is significant, and column 4 is the fold increase (positive number) or decrease (negative sign) for the 10-day immobilized as compared to the control value, e.g., the -1.69-fold decrease for the EST for human filamin c, gamma, in row 1 means that immobilized soleus muscles were less than control.

| Gene Name                                                                         | ID                   | p-value                | Fold           |
|-----------------------------------------------------------------------------------|----------------------|------------------------|----------------|
| <b>ACTIN BINDING/CYTOSKELETON</b>                                                 |                      |                        |                |
| ESTs similar to human filamin C, gamma (actin binding protein 280)                | AA799773             | 5.772E-07              | -1.69          |
| ESTs similar to human synaptopodin 2 (myopodin)                                   | AI171209             | 1.918E-06              | -1.40          |
| ESTs similar to mouse cofilin 2, muscle myozenin 2 (calsarcin-1)                  | AI010742<br>AI104354 | 3.842E-06<br>3.295E-07 | -2.06<br>-1.56 |
| ESTs similar to mouse ankyrin 1, erythroid                                        | AI137502             | 7.306E-07              | -1.63          |
| <b>AMINO ACID METABOLISM</b>                                                      |                      |                        |                |
| ornithine decarboxylase 1                                                         | J04791               | 6.400E-10              | -2.95          |
| ornithine decarboxylase 1                                                         | X07944               | 4.887E-09              | -2.16          |
| ornithine decarboxylase 1                                                         | J04792               | 4.190E-08              | -2.03          |
| glutamic-oxaloacetic transaminase 2, mitochondrial (aspartate aminotransferase 2) | M18467               | 3.097E-07              | -1.60          |
| ESTs similar to mouse glutamate-cysteine ligase, modifier subunit                 | AI008385             | 9.011E-08              | -1.88          |
| Branched chain alpha-ketoacid dehydrogenase subunit E1 alpha                      | J02827               | 2.757E-06              | 1.65           |
| cytosolic cysteine dioxygenase 1                                                  | AA942685             | 3.696E-06              | 1.94           |
| ESTs similar to mouse spermine synthase                                           | AI236640             | 1.592E-06              | -1.66          |
| <b>ATP BINDING</b>                                                                |                      |                        |                |
| adenylate kinase 2                                                                | AA799466             | 8.682E-07              | -1.54          |
| <b>CARBOHYDRATE METABOLISM</b>                                                    |                      |                        |                |
| ESTs similar to mouse acid sphingomyelinase-like phosphodiesterase 3a             | AI177804             | 7.782E-08              | 1.73           |
| ESTs similar to mouse sphingomyelin phosphodiesterase 1, acid lysosomal           | AI169302             | 1.573E-06              | -1.29          |
| <b>CELL ADHESION</b>                                                              |                      |                        |                |

|                                                                                                           |          |           |       |
|-----------------------------------------------------------------------------------------------------------|----------|-----------|-------|
| ESTs similar to mouse lectin, galactose binding, soluble 7                                                | AI112969 | 3.282E-07 | -1.76 |
| afadin (also known as myeloid/lymphoid or mixed lineage-leukemia translocation to 4 homolog) (Drosophila) | D90401   | 3.532E-07 | -1.74 |
| ESTs weakly similar to mouse putative neuronal cell adhesion molecule                                     | AI175338 | 8.578E-07 | 1.81  |
| ESTs similar to mouse transforming growth factor, beta induced, 68 kDa                                    | AI231127 | 4.611E-09 | 1.61  |

### CELL CYCLE

|                                                                       |          |           |      |
|-----------------------------------------------------------------------|----------|-----------|------|
| ESTs weakly similar to mouse paneth cell enhanced expression          | AI045824 | 1.551E-09 | 3.95 |
| ESTs similar to mouse cyclin G2                                       | AI171262 | 4.599E-07 | 1.68 |
| ESTs similar to mouse cyclin-dependent kinase 9 (CDC2-related kinase) | AA955926 | 3.811E-09 | 1.44 |
| growth arrest specific 5                                              | U77829   | 1.739E-08 | 1.95 |
| growth arrest specific 5                                              | AI111599 | 5.481E-08 | 2.30 |

### CELL PROLIFERATION

|                                                              |          |           |      |
|--------------------------------------------------------------|----------|-----------|------|
| ESTs similar to mouse interferon-stimulated protein (20 kDa) | AI045075 | 2.856E-06 | 1.99 |
|--------------------------------------------------------------|----------|-----------|------|

### CHAPERONE

|                                                                                                                     |          |           |       |
|---------------------------------------------------------------------------------------------------------------------|----------|-----------|-------|
| ESTs similar to mouse McKusick-Kaufman syndrome protein                                                             | AI104266 | 1.786E-06 | -1.69 |
| ESTs similar to mouse DnaJ (Hsp40) homolog, subfamily A, member 4                                                   | AA799570 | 3.570E-09 | -3.01 |
| ESTs similar to mouse DnaJ (Hsp40) homolog, subfamily A, member 4                                                   | AA848268 | 3.653E-09 | -3.13 |
| ESTs similar to mouse heat shock protein, 105 kDa                                                                   | AI236601 | 1.233E-08 | -2.80 |
| heat shock protein 60 (liver)                                                                                       | X54793   | 3.466E-08 | -1.76 |
| ESTs similar to human DnaJ (Hsp40) homolog, subfamily B, member 4                                                   | AI008643 | 4.930E-08 | -2.46 |
| heat shock 70kD protein 5 (glucose-regulated protein precursor (GRP 78)/immunoglobulin heavy chain binding protein) | S63521   | 1.433E-07 | -2.43 |
| testis-specific heat shock protein-related gene hst70                                                               | X15705   | 1.930E-07 | -3.00 |
| heat shock 70 kDa protein 4                                                                                         | AF077354 | 6.643E-07 | -1.77 |
| Heat shock 10 kDa protein 1                                                                                         | AI170613 | 2.102E-06 | -1.41 |

### COENZYME BIOSYNTHESIS

|                                             |          |           |       |
|---------------------------------------------|----------|-----------|-------|
| ESTs similar to mouse pantothenate kinase 1 | AA850195 | 2.945E-06 | -3.34 |
|---------------------------------------------|----------|-----------|-------|

### CYCLIC NUCLEOTIDE METABOLISM

|                                                                                                                        |          |           |       |
|------------------------------------------------------------------------------------------------------------------------|----------|-----------|-------|
| diphosphoinositol polyphosphate phosphohydrolase type II (nudix (nucleoside diphosphate linked moiety X)-type motif 4) | U95001   | 7.525E-09 | -2.48 |
| diphosphoinositol polyphosphate phosphohydrolase type II                                                               | AA891107 | 3.512E-06 | -3.15 |

### DEVELOPMENT

|                                                                       |        |           |       |
|-----------------------------------------------------------------------|--------|-----------|-------|
| amino-terminal enhancer of split (related to Drosophila groucho gene) | L14462 | 5.781E-07 | -2.00 |
|-----------------------------------------------------------------------|--------|-----------|-------|

FAT tumor suppressor (Drosophila) homolog AI103370 2.263E-06 -1.62

## ELECTRON TRANSPORT

ESTs similar to mouse cytochrome P450, AI176856 2.647E-08 2.69  
1b1, benz[a]anthracene inducible

Rieske iron-sulfur polypeptide 1, ubiquinol- M24542 1.837E-07 -1.39  
cytochrome c reductase

cytochrome P450, subfamily 1B, polypeptide U09540 3.621E-07 3.65  
1

ESTs weakly similar to human interleukin 4 AI233687 3.981E-07 2.25  
induced 1

ESTs similar to mouse aspartate-beta- AA799621 2.091E-09 -1.86  
hydroxylase

ESTs similar to human NADH AI171362 7.924E-07 -2.26  
dehydrogenase (ubiquinone) Fe-S protein 1,  
75kDa (NADH-coenzyme Q reductase)

ESTs similar to human NADH AA891171 7.945E-07 -1.48  
dehydrogenase (ubiquinone) 1, subcomplex  
unknown, 2, 14.5kDa

ESTs similar to human NADH AA875107 4.715E-07 -1.68  
dehydrogenase (ubiquinone) 1 alpha  
subcomplex, 3, 9kDa

ESTs weakly similar to mouse NADH AA685112 1.602E-06 -1.67  
dehydrogenase:ubiquinone Fe-S protein 8  
(Ndufs8) gene

## TCA CYCLE

ESTs similar to mouse isocitrate AI105469 5.725E-07 -1.40  
dehydrogenase 3 (NAD+) beta

Malate dehydrogenase-like enzyme AF093773 1.239E-07 -1.56

ESTs weakly similar to mouse pyruvate AI176117 2.037E-06 -1.38  
dehydrogenase (lipoamide) beta

ESTs highly similar to mouse isocitrate AI172491 1.389E-11 -2.24  
dehydrogenase 2 (NADP+), mitochondrial

ESTs similar to human succinate AI172320 2.166E-10 -1.64  
dehydrogenase complex, subunit B, iron  
sulfur (Ip)

malate dehydrogenase mitochondrial AI010480 2.723E-09 -1.69

ESTs similar to mouse succinate AA925554 1.268E-08 -1.65  
dehydrogenase complex, subunit A,  
flavoprotein (Fp)

ESTs similar to mouse succinate AA925554 1.505E-07 -1.87  
dehydrogenase complex, subunit A,  
flavoprotein (Fp)

succinate-CoA ligase, GDP-forming, alpha J03621 6.303E-07 -1.49  
subunit

## ESTS UNKNOWN FUNCTION

ESTs unknown function AI009340 2.669E-11 -3.23

ESTs unknown function AI101500 4.094E-11 -2.29

ESTs unknown function AA858892 2.083E-10 4.68

ESTs unknown function AA996832 2.941E-10 -2.24

ESTs unknown function AI170673 7.303E-10 1.71

ESTs unknown function AA901326 8.863E-10 2.45

ESTs unknown function AA799773 1.722E-09 -1.75

ESTs unknown function AI178272 5.659E-09 -1.99

|                       |          |           |       |
|-----------------------|----------|-----------|-------|
| ESTs unknown function | AA944906 | 6.077E-09 | 1.65  |
| ESTs unknown function | AI011920 | 6.805E-09 | 2.04  |
| ESTs unknown function | AI145095 | 8.050E-09 | 2.82  |
| ESTs unknown function | AI232776 | 8.823E-09 | -2.83 |
| ESTs unknown function | AA817976 | 1.272E-08 | 2.15  |
| ESTs unknown function | AI179601 | 1.467E-08 | 2.23  |
| ESTs unknown function | AI009467 | 1.883E-08 | -1.79 |
| ESTs unknown function | AI145607 | 1.889E-08 | 1.48  |
| ESTs unknown function | AI044120 | 2.665E-08 | -1.89 |
| ESTs unknown function | AA955369 | 2.686E-08 | -1.95 |
| ESTs unknown function | AA997596 | 2.798E-08 | -1.97 |
| ESTs unknown function | AA925708 | 3.884E-08 | 1.91  |
| ESTs unknown function | AI104099 | 3.886E-08 | -1.45 |
| ESTs unknown function | AI011634 | 4.743E-08 | -1.86 |
| ESTs unknown function | AI170251 | 6.613E-08 | 1.99  |
| ESTs unknown function | AI172007 | 7.268E-08 | -1.69 |
| ESTs unknown function | AA800576 | 7.383E-08 | 1.49  |
| ESTs unknown function | AA998013 | 8.195E-08 | -2.11 |
| ESTs unknown function | AA964617 | 8.237E-08 | 1.64  |
| ESTs unknown function | AA925049 | 8.561E-08 | 2.52  |
| ESTs unknown function | AA801048 | 9.215E-08 | 1.84  |
| ESTs unknown function | AA818846 | 9.227E-08 | 2.05  |
| ESTs unknown function | AI236778 | 9.503E-08 | 1.80  |
| ESTs unknown function | AA892773 | 1.276E-07 | 1.54  |
| ESTs unknown function | AA875147 | 1.502E-07 | 1.54  |
| ESTs unknown function | AA998222 | 1.555E-07 | 2.14  |
| ESTs unknown function | AI175541 | 1.590E-07 | -1.52 |
| ESTs unknown function | AI045056 | 1.657E-07 | 2.29  |
| ESTs unknown function | AI043913 | 1.714E-07 | 1.79  |
| ESTs unknown function | AI059014 | 2.174E-07 | -2.29 |
| ESTs unknown function | AI228128 | 2.388E-07 | -1.89 |
| ESTs unknown function | AI171982 | 2.515E-07 | -2.02 |
| ESTs unknown function | AI175534 | 2.843E-07 | -1.36 |
| ESTs unknown function | AI234038 | 3.101E-07 | 1.42  |
| ESTs unknown function | AA800197 | 3.236E-07 | 2.06  |
| ESTs unknown function | AA892010 | 3.400E-07 | -1.70 |
| ESTs unknown function | AA819717 | 3.428E-07 | -1.45 |
| ESTs unknown function | AA957785 | 3.454E-07 | 2.01  |
| ESTs unknown function | AI228760 | 3.463E-07 | 2.17  |
| ESTs unknown function | AI232724 | 3.925E-07 | -1.65 |
| ESTs unknown function | AI104039 | 3.981E-07 | -1.51 |
| ESTs unknown function | AI177836 | 4.178E-07 | 1.98  |
| ESTs unknown function | AA817726 | 4.780E-07 | 1.44  |
| ESTs unknown function | AI044874 | 5.254E-07 | -1.67 |
| ESTs unknown function | AI236520 | 6.622E-07 | -1.64 |
| ESTs unknown function | AA925708 | 6.851E-07 | 1.58  |
| ESTs unknown function | AI011058 | 7.062E-07 | 1.45  |
| ESTs unknown function | AI058524 | 7.106E-07 | -2.12 |
| ESTs unknown function | AA946415 | 7.363E-07 | -1.42 |
| ESTs unknown function | AI103153 | 8.247E-07 | 1.44  |
| ESTs unknown function | AI030259 | 8.261E-07 | -1.54 |
| ESTs unknown function | AI639166 | 8.309E-07 | 1.97  |
| ESTs unknown function | AA893193 | 8.876E-07 | 1.58  |
| ESTs unknown function | AI227902 | 8.910E-07 | 1.70  |
| ESTs unknown function | AI112118 | 9.510E-07 | -1.65 |
| ESTs unknown function | AI105465 | 9.522E-07 | -1.34 |
| ESTs unknown function | AI172157 | 9.763E-07 | -1.73 |
| ESTs unknown function | AI231074 | 1.001E-06 | 1.68  |
| ESTs unknown function | AI231219 | 1.073E-06 | 1.63  |

|                       |          |           |       |
|-----------------------|----------|-----------|-------|
| ESTs unknown function | AI639167 | 1.081E-06 | 2.51  |
| ESTs unknown function | AI009509 | 1.173E-06 | -1.63 |
| ESTs unknown function | AI233812 | 1.209E-06 | -1.67 |
| ESTs unknown function | AI180247 | 1.220E-06 | 1.34  |
| ESTs unknown function | AI236307 | 1.235E-06 | 1.53  |
| ESTs unknown function | AI229154 | 1.266E-06 | 1.56  |
| ESTs unknown function | AI169150 | 1.432E-06 | 1.71  |
| ESTs unknown function | AA817708 | 1.434E-06 | 1.32  |
| ESTs unknown function | AI232440 | 1.525E-06 | 1.95  |
| ESTs unknown function | AI012648 | 1.530E-06 | 1.77  |
| ESTs unknown function | AI175776 | 1.556E-06 | 2.22  |
| ESTs unknown function | AA996578 | 1.564E-06 | 1.90  |
| ESTs unknown function | AA875390 | 1.606E-06 | 2.16  |
| ESTs unknown function | AI236528 | 1.630E-06 | 1.63  |
| ESTs unknown function | AI231083 | 1.669E-06 | -1.53 |
| ESTs unknown function | AI172246 | 1.695E-06 | 2.01  |
| ESTs unknown function | AI172460 | 1.752E-06 | 1.53  |
| ESTs unknown function | AI071166 | 1.754E-06 | 1.99  |
| ESTs unknown function | AI179865 | 1.778E-06 | 1.40  |
| ESTs unknown function | AI044433 | 1.833E-06 | 1.54  |
| ESTs unknown function | AI137037 | 1.837E-06 | -1.41 |
| ESTs unknown function | AI045021 | 1.865E-06 | -1.81 |
| ESTs unknown function | AI231797 | 1.880E-06 | 1.56  |
| ESTs unknown function | AA893584 | 1.903E-06 | 1.55  |
| ESTs unknown function | AA893000 | 1.989E-06 | 2.00  |
| ESTs unknown function | AA946032 | 2.134E-06 | -1.93 |
| ESTs unknown function | AA926354 | 2.136E-06 | 1.42  |
| ESTs unknown function | AA946509 | 2.450E-06 | 1.55  |
| ESTs unknown function | AI232494 | 2.965E-06 | -1.59 |
| ESTs unknown function | AI170609 | 3.084E-06 | 1.81  |
| ESTs unknown function | AA849827 | 3.144E-06 | -2.51 |
| ESTs unknown function | AI070107 | 3.160E-06 | -1.78 |
| ESTs unknown function | AI169595 | 3.407E-06 | 1.89  |
| ESTs unknown function | AI171759 | 3.451E-06 | -1.88 |
| ESTs unknown function | AI012619 | 3.470E-06 | -1.43 |
| ESTs unknown function | AA955358 | 3.492E-06 | -1.80 |
| ESTs unknown function | AI175619 | 3.495E-06 | 1.75  |
| ESTs unknown function | AI235950 | 3.744E-06 | -1.62 |
| ESTs unknown function | AA892310 | 3.823E-06 | 1.37  |
| ESTs unknown function | AI013971 | 3.837E-06 | -1.65 |
| ESTs unknown function | AI112074 | 3.857E-06 | 1.51  |

|                                       |
|---------------------------------------|
| GENES<br>UNCLEAR/UNKNOWN<br>FUNCTIONS |
|---------------------------------------|

|                                                                            |                      |                        |               |
|----------------------------------------------------------------------------|----------------------|------------------------|---------------|
| ESTs similar to mouse mannose-P-dolichol utilization defect 1              | AI169037             | 1.196E-11              | 1.77          |
| ESTs similar to human parkin co-regulated gene protein                     | AI010950             | 2.393E-11              | -9.16         |
| ESTs similar to human chromobox homolog 7                                  | AA997327             | 5.378E-11              | 2.32          |
| ESTs similar to mouse ankyrin repeat domain 2 (stretch responsive muscle)  | AI170842             | 1.452E-10              | -5.96         |
| ESTs similar to mouse mitsugumin 29 mannosidase, alpha, class 2C, member 1 | AI171372<br>AA946384 | 1.770E-09<br>3.296E-09 | -3.90<br>1.72 |
| peroxisomal integral membrane protein 47                                   | AA894090             | 4.090E-09              | 1.85          |

|                                                                                          |          |           |       |
|------------------------------------------------------------------------------------------|----------|-----------|-------|
| Rat endogenous retroviral sequence, 5' and 3' LTR                                        | AI177033 | 4.493E-09 | 1.63  |
| Mk1 protein                                                                              | AA819834 | 8.775E-09 | 1.99  |
| neurolysin (metallopeptidase M3 family)                                                  | X87157   | 9.302E-09 | 2.04  |
| zinc finger protein Y1 (RLZF-Y)                                                          | AF052042 | 1.073E-08 | -1.64 |
| ESTs similar to mouse Rac/Cdc42 guanine nucleotide exchange factor (GEF) 6               | AI177431 | 1.235E-08 | -2.20 |
| ESTs similar to mouse glutamate receptor, ionotropic, N-methyl D-aspartate-like 1A       | AI171953 | 1.797E-08 | -1.61 |
| ESTs similar to human histidyl-tRNA synthetase 2                                         | AI233365 | 3.459E-08 | 1.55  |
| ESTs similar to human Opa-interacting protein 2                                          | AA924460 | 4.456E-08 | 1.52  |
| ESTs weakly similar to mouse novel nuclear protein 1                                     | AI172021 | 5.213E-08 | -2.00 |
| ESTs similar to mouse formin binding protein 4                                           | AI176976 | 5.378E-08 | 1.89  |
| ESTs similar to human uncharacterized hypothalamus protein HT012                         | AA819653 | 8.690E-08 | -1.97 |
| ESTs similar to human uncharacterized hematopoietic stem/progenitor cells protein MDS032 | AA892132 | 9.202E-08 | 1.70  |
| ESTs similar to human mitochondrial ribosomal protein L24                                | AA892843 | 9.908E-08 | -1.66 |
| ESTs similar to human SR rich protein                                                    | AA925771 | 1.383E-07 | 2.46  |
| ESTs weakly similar to zebrafish dead eye                                                | AI169375 | 1.728E-07 | 1.55  |
| GCIP-interacting protein p29                                                             | AI228120 | 2.366E-07 | 1.67  |
| glutathione transferase subunit 8                                                        | X62660   | 2.519E-07 | -1.91 |
| ESTs similar to mouse LIM domain binding 3 (cypher)                                      | AI175028 | 2.790E-07 | -1.89 |
| ESTs similar to human oxidoreductase UCPA                                                | AI232784 | 3.071E-07 | 2.15  |
| ESTs similar to mouse imprinted and ancient (Impact)                                     | AI101901 | 3.215E-07 | 2.05  |
| upregulated by 1,25-dihydroxyvitamin D-3 (also known as thioredoxin interacting protein) | AI237654 | 3.504E-07 | 2.30  |
| EST similar to rat Hsp70-3 gene                                                          | AA875620 | 3.671E-07 | 1.60  |
| ESTs similar to human CGI-10 protein                                                     | AA956185 | 3.876E-07 | -1.35 |
| ESTs similar to human ubiquinol-cytochrome c reductase complex (7.2 kD)                  | AI007981 | 4.094E-07 | -1.42 |
| ESTs similar to human slingshot 2                                                        | AA924428 | 4.136E-07 | 1.28  |
| ESTs similar to human uveal autoantigen with coiled-coil domains and ankyrin repeats     | AA684631 | 4.519E-07 | 1.75  |
| proline rich protein                                                                     | U61729   | 5.141E-07 | 2.00  |
| ESTs similar to mouse SPRY domain-containing SOCS box protein SSB-4                      | AI111413 | 5.897E-07 | -1.58 |
| ribosomal DNA external transcribed spacer 1                                              | AI008579 | 6.794E-07 | -2.62 |
| ESTs similar to human cyclin M4                                                          | AA860015 | 8.729E-07 | -1.76 |
| ESTs similar to mouse LIM domain binding 3 (cypher)                                      | AA800216 | 9.527E-07 | -2.01 |
| CCA2 protein                                                                             | AB000199 | 1.019E-06 | -1.66 |

|                                                                                           |          |           |       |
|-------------------------------------------------------------------------------------------|----------|-----------|-------|
| ESTs similar to mouse BCL2-like 13 (apoptosis facilitator)                                | AA800808 | 1.140E-06 | 2.37  |
| ESTs similar to mouse ALL1-fused gene from chromosome 1q                                  | AI009661 | 1.264E-06 | -3.26 |
| ESTs similar to mouse pM5 protein                                                         | AI011709 | 1.266E-06 | 1.89  |
| ESTs similar to mouse FN5 protein                                                         | AI172530 | 1.489E-06 | -1.54 |
| ESTs similar to mouse ataxin-1 ubiquitin-like interacting protein                         | AI177410 | 1.510E-06 | -1.80 |
| ESTs similar to mouse sclerostin                                                          | AI170797 | 1.513E-06 | 1.53  |
| ESTs similar to mouse pleckstrin homology domain containing, family B (evectins) member 2 | AI233241 | 1.587E-06 | -1.65 |
| ESTs weakly similar to human thioredoxin-like protein p19                                 | AA925478 | 1.750E-06 | -1.57 |
| RNA, U87 small nucleolar                                                                  | AI232081 | 1.938E-06 | 1.70  |
| ESTs similar to mouse feminization homolog a (C. elegans)                                 | AA900474 | 1.940E-06 | -1.59 |
| ESTs similar to mouse feminization homolog a (C. elegans)                                 | AA848569 | 2.361E-06 | -1.51 |
| ESTs similar to human U6 snRNA-associated Sm-like protein LSm8                            | AI177016 | 2.494E-06 | 1.69  |
| ESTs similar to human CGI-128 protein                                                     | AI232613 | 2.960E-06 | -1.63 |
| ESTs similar to mouse GH regulated protein 1                                              | AI070859 | 2.988E-06 | -2.15 |
| ESTs similar to human retinoic acid induced 17                                            | AI230440 | 3.420E-06 | 1.60  |
| ESTs similar to human catenin, beta like 1                                                | AI059023 | 3.591E-06 | 1.36  |

## GLUTATHIONE TRANSFERASE

|                                                         |          |           |       |
|---------------------------------------------------------|----------|-----------|-------|
| glutathione S-transferase, mu 5                         | U86635   | 7.809E-11 | 2.53  |
| Glutathione-S-transferase, mu type 2 (Yb2)              | X04229   | 8.867E-10 | 2.03  |
| Glutathione-S-transferase, mu type 2 (Yb2)              | J03914   | 2.279E-09 | 3.82  |
| Glutathione-S-transferase, mu type 2 (Yb2)              | J02592   | 6.327E-09 | 3.92  |
| glutathione S-transferase, mu 5                         | U86635   | 1.990E-08 | 2.04  |
| Glutathione-S-transferase, mu type 2 (Yb2)              | J02810   | 2.987E-08 | 1.54  |
| glutathione S-transferase, mu type 3 (Yb3)              | E01415   | 1.059E-07 | 1.86  |
| microsomal glutathione S-transferase 1                  | J03752   | 2.269E-06 | 1.91  |
| ESTs similar to human glutathione S-transferase theta 1 | AA819192 | 3.090E-06 | -1.43 |

## G-PROTEIN COUPLED RECEPTOR SIGNALING

|                                                         |          |           |       |
|---------------------------------------------------------|----------|-----------|-------|
| corticotrophin releasing hormone receptor 2             | U16253   | 3.848E-08 | 2.35  |
| ESTs weakly similar to mouse neuropeptide Y receptor Y1 | AI231501 | 2.956E-07 | 1.43  |
| Calmodulin 1 (phosphorylase kinase, delta)              | E02315   | 1.020E-06 | -1.35 |

## GTP BINDING

|                                                         |          |           |       |
|---------------------------------------------------------|----------|-----------|-------|
| ESTs similar to human RAB1B, member RAS oncogene family | AA851765 | 5.698E-07 | -1.46 |
|---------------------------------------------------------|----------|-----------|-------|

## HEME BIOSYNTHESIS

|                                        |          |           |       |
|----------------------------------------|----------|-----------|-------|
| aminolevulinatase, delta-, dehydratase | AA800745 | 8.522E-07 | -1.43 |
|----------------------------------------|----------|-----------|-------|

## IMMUNE/INFLAMMATORY RESPONSE

|                                                            |          |           |      |
|------------------------------------------------------------|----------|-----------|------|
| MHC class I histocompatibility antigen RT- BM1 alpha chain | AF029240 | 2.136E-06 | 1.92 |
|------------------------------------------------------------|----------|-----------|------|

|                                   |          |           |      |
|-----------------------------------|----------|-----------|------|
| ESTs similar to mouse annexin A11 | AI232030 | 1.403E-06 | 1.89 |
|-----------------------------------|----------|-----------|------|

|                        |        |           |      |
|------------------------|--------|-----------|------|
| Complement component 4 | U42719 | 1.041E-06 | 1.86 |
|------------------------|--------|-----------|------|

## ION TRANSPORT

|                                                       |        |           |      |
|-------------------------------------------------------|--------|-----------|------|
| Solute carrier family 30 (zinc transporter), member 2 | U50927 | 3.463E-06 | 1.95 |
|-------------------------------------------------------|--------|-----------|------|

|                                   |          |           |       |
|-----------------------------------|----------|-----------|-------|
| voltage-dependent anion channel 1 | AI176266 | 1.007E-08 | -1.28 |
|-----------------------------------|----------|-----------|-------|

|                                   |          |           |       |
|-----------------------------------|----------|-----------|-------|
| voltage-dependent anion channel 1 | AA848348 | 5.339E-07 | -1.46 |
|-----------------------------------|----------|-----------|-------|

|                                                               |          |           |       |
|---------------------------------------------------------------|----------|-----------|-------|
| ATPase, Na <sup>+</sup> /K <sup>+</sup> transporting, alpha 1 | AI072060 | 8.844E-07 | -1.83 |
|---------------------------------------------------------------|----------|-----------|-------|

|                                                                        |          |           |       |
|------------------------------------------------------------------------|----------|-----------|-------|
| ATPase Na <sup>+</sup> /K <sup>+</sup> transporting beta 1 polypeptide | AI112173 | 3.599E-06 | -2.05 |
|------------------------------------------------------------------------|----------|-----------|-------|

## IRON/COPPER HOMEOSTASIS

|               |          |           |      |
|---------------|----------|-----------|------|
| ceruloplasmin | AI010470 | 8.536E-09 | 3.66 |
|---------------|----------|-----------|------|

|               |        |           |      |
|---------------|--------|-----------|------|
| ceruloplasmin | L33869 | 1.333E-06 | 4.34 |
|---------------|--------|-----------|------|

## LECTIN

|                                                    |          |           |      |
|----------------------------------------------------|----------|-----------|------|
| ESTs similar to mouse osteoclast inhibitory lectin | AI012222 | 1.390E-06 | 2.11 |
|----------------------------------------------------|----------|-----------|------|

## LIPID METABOLISM

|                                                      |          |           |       |
|------------------------------------------------------|----------|-----------|-------|
| ESTs similar to mouse acetyl-Coenzyme A synthetase 2 | AA848492 | 9.745E-07 | -1.94 |
|------------------------------------------------------|----------|-----------|-------|

|                                                       |            |           |       |
|-------------------------------------------------------|------------|-----------|-------|
| L-3-hydroxyacyl-Coenzyme A dehydrogenase, short chain | A AA848758 | 9.880E-07 | -1.80 |
|-------------------------------------------------------|------------|-----------|-------|

|                                 |        |           |      |
|---------------------------------|--------|-----------|------|
| carnitine O-octanoyltransferase | U26033 | 1.248E-06 | 1.66 |
|---------------------------------|--------|-----------|------|

|                                     |          |           |      |
|-------------------------------------|----------|-----------|------|
| Uncoupling protein 3, mitochondrial | AF035943 | 2.788E-06 | 2.95 |
|-------------------------------------|----------|-----------|------|

|                  |        |           |      |
|------------------|--------|-----------|------|
| apolipoprotein D | X55572 | 7.238E-08 | 2.29 |
|------------------|--------|-----------|------|

|                  |        |           |      |
|------------------|--------|-----------|------|
| apolipoprotein E | X04979 | 1.657E-07 | 1.56 |
|------------------|--------|-----------|------|

|                  |        |           |      |
|------------------|--------|-----------|------|
| apolipoprotein E | S76779 | 9.591E-10 | 2.79 |
|------------------|--------|-----------|------|

|                                             |        |           |      |
|---------------------------------------------|--------|-----------|------|
| phosphatidylinositol transfer protein, beta | D21132 | 6.316E-08 | 1.46 |
|---------------------------------------------|--------|-----------|------|

|                          |        |           |       |
|--------------------------|--------|-----------|-------|
| brain acyl-CoA hydrolase | Y09332 | 1.715E-07 | -2.07 |
|--------------------------|--------|-----------|-------|

|                          |        |           |       |
|--------------------------|--------|-----------|-------|
| brain acyl-CoA hydrolase | D88890 | 3.825E-07 | -1.70 |
|--------------------------|--------|-----------|-------|

## LYSOSOME

|                                                                                    |          |           |      |
|------------------------------------------------------------------------------------|----------|-----------|------|
| ESTs similar to human glucosamine (N-acetyl)-6-sulfatase (Sanfilippo disease IIID) | AA892086 | 2.132E-08 | 1.38 |
|------------------------------------------------------------------------------------|----------|-----------|------|

|                                         |        |           |      |
|-----------------------------------------|--------|-----------|------|
| Lysosomal-associated membrane protein 2 | M32016 | 5.227E-07 | 1.92 |
|-----------------------------------------|--------|-----------|------|

|                                         |        |           |      |
|-----------------------------------------|--------|-----------|------|
| Lysosomal-associated membrane protein 2 | D90211 | 1.373E-06 | 2.42 |
|-----------------------------------------|--------|-----------|------|

## MUSCLE DEVELOPMENT

|                                      |          |           |      |
|--------------------------------------|----------|-----------|------|
| ESTs similar to mouse kyphoscoliosis | AI070590 | 5.105E-07 | 5.96 |
|--------------------------------------|----------|-----------|------|

|                         |        |           |       |
|-------------------------|--------|-----------|-------|
| cysteine-rich protein 3 | X81193 | 5.814E-07 | -3.09 |
|-------------------------|--------|-----------|-------|

## MUSCLE CONTRACTION

|                                                                  |        |           |       |
|------------------------------------------------------------------|--------|-----------|-------|
| myosin, light polypeptide 2, alkali; ventricular, skeletal, slow | M11851 | 7.887E-12 | -4.69 |
|------------------------------------------------------------------|--------|-----------|-------|



|                                                                              |          |           |       |
|------------------------------------------------------------------------------|----------|-----------|-------|
| nonmuscle tropomyosin 5 (Tpm5) isoforms NM 5 and NM 6 mRNA, partial cds      | AI170847 | 9.089E-08 | -2.28 |
| tropomyosin isoform 6                                                        | S82383   | 3.365E-07 | -2.01 |
| ESTs similar to mouse tropomyosin 3, gamma                                   | AI071098 | 3.202E-06 | -2.19 |
| creatine kinase, mitochondrial 2, sarcomeric                                 | X59736   | 1.040E-12 | -2.57 |
| ESTs similar to mouse troponin T3, skeletal, fast                            | AI136540 | 3.130E-08 | 2.75  |
| ESTs weakly similar to human titin immunoglobulin domain protein (myotilin)  | AI235512 | 2.279E-08 | 1.78  |
| ESTs similar to rat myosin heavy chain, polypeptide 7 (cardiac muscle, beta) | AA998374 | 5.347E-07 | -1.83 |

### NUCLEIC ACID BINDING

|                                                                                    |          |           |       |
|------------------------------------------------------------------------------------|----------|-----------|-------|
| breakpoint cluster region protein, leiomyoma, 1; barrier to autointegration factor | AA848386 | 3.800E-09 | -1.86 |
| ESTs similar to human SON DNA binding protein                                      | AA996621 | 4.897E-07 | 1.71  |
| ESTs similar to mouse Son cell proliferation protein                               | AI103377 | 1.268E-06 | 1.42  |
| nucleophosmin 1                                                                    | J03969   | 1.879E-06 | 1.51  |
| ESTs similar to human ataxin 2-binding protein 1                                   | AI102057 | 2.125E-06 | 1.66  |
| ESTs similar to human PR domain containing 2, with ZNF domain                      | AA899723 | 1.488E-06 | 1.67  |

### OSMOREGULATION/EXCRETION

|                                                                     |          |           |      |
|---------------------------------------------------------------------|----------|-----------|------|
| ESTs similar to mouse nephronophthisis 1 (juvenile) homolog (human) | AI176028 | 1.175E-11 | 1.83 |
|---------------------------------------------------------------------|----------|-----------|------|

### PROTEIN GLYCOSYLATION

|                                                                                                          |             |           |       |
|----------------------------------------------------------------------------------------------------------|-------------|-----------|-------|
| UDP-GalNAc:polypeptide acetylgalactosaminyltransferase T5                                                | N- AF049344 | 4.245E-08 | -1.45 |
| ESTs similar to mouse sirtuin 2 (silent mating type information regulation 2, homolog) 2 (S. cerevisiae) | AA799614    | 3.286E-07 | 1.40  |
| ESTs similar to mouse ADP-ribosyltransferase 5                                                           | AI070764    | 3.553E-08 | 2.94  |

### PROTEIN PHOSPHORYLATION

|                                                                                |          |           |       |
|--------------------------------------------------------------------------------|----------|-----------|-------|
| ESTs similar to mouse protein kinase, cAMP dependent regulatory, type I, alpha | AA946421 | 1.017E-08 | -1.48 |
| ESTs similar to mouse serine/threonine kinase 23                               | AI072058 | 4.547E-07 | -1.67 |
| serine/threonine kinase 6                                                      | AI146058 | 6.371E-09 | 2.68  |

### PROTEIN BINDING

|                                                                                    |          |           |       |
|------------------------------------------------------------------------------------|----------|-----------|-------|
| ESTs similar to mouse enigma homolog (R. norvegicus)                               | AA997341 | 7.486E-11 | -2.35 |
| ESTs similar to human enigma (LIM domain protein)                                  | AI104117 | 4.209E-09 | -2.74 |
| ESTs similar to mouse PTPRF interacting protein, binding protein 1 (liprin beta 1) | AI012434 | 1.492E-08 | 1.59  |

|                                                                         |          |           |       |
|-------------------------------------------------------------------------|----------|-----------|-------|
| ESTs similar to human myosin regulatory light chain interacting protein | AA818380 | 3.496E-07 | 1.90  |
| ESTs similar to mouse integrin beta 1 binding protein 2 (melusin)       | AA849578 | 5.671E-07 | -2.02 |

### PROTEIN DEGRADATION

|                                                                                                   |          |           |      |
|---------------------------------------------------------------------------------------------------|----------|-----------|------|
| ESTs similar to mouse autophagy 12-like (S. cerevisiae)                                           | AI178979 | 1.320E-06 | 1.24 |
| for proteasomal ATPase (SUG1) (also known as protease (prosome, macropain) 26S subunit, ATPase 5) | AB000491 | 9.077E-07 | 1.77 |
| ESTs similar to mouse proteasome (prosome, macropain) 26S subunit, non-ATPase, 2                  | AI172107 | 1.168E-06 | 1.46 |
| proteasome (prosome, macropain) 26S subunit, non-ATPase, 9                                        | AI175576 | 1.886E-06 | 2.00 |
| proteasome (prosome, macropain) subunit, alpha type 7                                             | AI179950 | 2.441E-06 | 1.41 |
| ESTs similar to mouse proteasome (prosome, macropain) subunit, beta type 4                        | AI172162 | 2.759E-06 | 1.73 |

|                                                                |          |           |       |
|----------------------------------------------------------------|----------|-----------|-------|
| cathepsin L                                                    | S85184   | 4.372E-11 | 4.66  |
| calpain 3                                                      | J05121   | 2.215E-09 | -1.81 |
| calpain 3                                                      | AF052540 | 2.729E-09 | -1.85 |
| membrane-bound transcription factor protease, site 1           | AI101111 | 9.134E-09 | 1.64  |
| calpain 3                                                      | AF061726 | 1.148E-07 | -1.95 |
| cathepsin L                                                    | S85184   | 1.762E-07 | 2.11  |
| ESTs similar to mouse f-box and leucine-rich repeat protein 3a | AI145387 | 3.803E-09 | 2.10  |
| ubiquitin C                                                    | D17296   | 7.469E-07 | 1.48  |

### PROTEIN SYNTHESIS

|                                                            |           |           |       |
|------------------------------------------------------------|-----------|-----------|-------|
| ESTs similar to mouse alanyl-tRNA synthetase               | AI180068  | 2.298E-06 | -1.37 |
| ESTs similar to human translation initiation factor IF2    | AA945769  | 1.630E-06 | 1.59  |
| eukaryotic translation initiation factor binding protein 1 | 4E U05014 | 2.536E-07 | 1.93  |

### PROTON TRANSPORT

|                                                                                                                     |          |           |       |
|---------------------------------------------------------------------------------------------------------------------|----------|-----------|-------|
| ATPase, H+ transporting, lysosomal noncatalytic accessory protein 1a                                                | M58758   | 2.469E-07 | 1.76  |
| ESTs similar to mouse ATP synthase, H+ transporting, mitochondrial F0 complex, subunit g                            | AA849619 | 2.755E-06 | -1.43 |
| ESTs highly similar to rat ATP synthase, H+ transporting, mitochondrial F0 complex, subunit c (subunit 9) isoform 3 | AI180425 | 8.982E-08 | -1.58 |
| ATP synthase, H+ transporting, mitochondrial F1 complex, epsilon subunit                                            | AI171844 | 1.428E-06 | -1.34 |

### REGULATION OF TRANSCRIPTION

|                                                         |          |           |       |
|---------------------------------------------------------|----------|-----------|-------|
| ESTs similar to mouse activating transcription factor 5 | AI233425 | 2.104E-07 | -2.05 |
| Kruppel-like factor 15                                  | AI103584 | 1.119E-06 | 1.87  |
| ESTs similar to mouse CD8 beta opposite strand          | AI010736 | 4.916E-09 | -2.03 |

|                                                                                                                                |           |       |
|--------------------------------------------------------------------------------------------------------------------------------|-----------|-------|
| ESTs similar to mouse mini chromosome AA858636 maintenance deficient 7 ( <i>S. cerevisiae</i> )                                | 2.319E-06 | 1.52  |
| ESTs similar to human sirtuin silent mating type information regulation 2 homolog 5 ( <i>S. cerevisiae</i> )                   | 2.524E-06 | 1.55  |
| ESTs similar to mouse signal transducer and activator of transcription 1                                                       | 1.146E-07 | -2.18 |
| ESTs similar to mouse transcription factor-like 4                                                                              | 4.907E-07 | 1.44  |
| ESTs highly similar to mouse estrogen related receptor, alpha                                                                  | 1.925E-06 | -1.70 |
| ESTs similar to mouse tripartite motif protein 10 (also known as ring finger protein 9)                                        | 1.229E-06 | -1.29 |
| ESTs similar to mouse polymerase (RNA) II (DNA directed) polypeptide E (25kDa)                                                 | 3.531E-06 | 2.44  |
| ESTs similar to mouse RNA polymerase 1-3 (16 kDa subunit)                                                                      | 1.231E-06 | 1.48  |
| ESTs similar to mouse leucine rich repeat (in FLII) interacting protein 1                                                      | 2.494E-10 | -1.95 |
| ESTs similar to mouse SWI/SNF related, matrix associated, actin dependent regulator of chromatin, subfamily e, member 1        | 1.888E-06 | 1.56  |
| ESTs similar to mouse serum response factor                                                                                    | 3.342E-06 | -1.56 |
| ESTs similar to mouse ash2 (absent, small, or homeotic)-like ( <i>Drosophila</i> )                                             | 6.209E-07 | 1.46  |
| ESTs weakly similar to human SWI/SNF related, matrix associated, actin dependent regulator of chromatin, subfamily a, member 2 | 9.975E-07 | 2.29  |

## RNA PROCESSING

|                                                                                                                                               |          |           |       |
|-----------------------------------------------------------------------------------------------------------------------------------------------|----------|-----------|-------|
| ESTs similar to human decapping enzyme hDcp1b                                                                                                 | AA819177 | 2.334E-06 | 1.41  |
| ESTs similar to human splicing factor, arginine/serine-rich 7, 35kDa                                                                          | AI171267 | 9.419E-07 | 1.58  |
| splicing factor, arginine/serine-rich 5                                                                                                       | L13635   | 7.078E-08 | 1.62  |
| ESTs similar to mouse heterogeneous nuclear ribonucleoprotein C                                                                               | AA799995 | 1.949E-08 | -1.61 |
| ESTs similar to mouse fragile X mental retardation gene 2, autosomal homolog                                                                  | AI232174 | 2.200E-08 | 1.46  |
| transporter protein; system N1 Na <sup>+</sup> and H <sup>+</sup> - coupled glutamine transporter (heterogeneous nuclear ribonucleoprotein U) | D14048   | 7.503E-07 | 1.63  |
| ESTs very weakly similar to human dual specificity phosphatase 11 (RNA/RNP complex 1-interacting)                                             | AI232489 | 2.994E-06 | -1.30 |
| ESTs similar to mouse apolipoprotein B editing complex 2                                                                                      | AA945951 | 3.459E-06 | -1.89 |

## SELENIUM BINDING

|                                       |          |           |      |
|---------------------------------------|----------|-----------|------|
| ESTs similar to mouse selenoprotein R | AI011843 | 1.760E-08 | 1.73 |
|---------------------------------------|----------|-----------|------|

## SIGNAL TRANSDUCTION

|                                                                            |          |           |      |
|----------------------------------------------------------------------------|----------|-----------|------|
| ESTs similar to mouse and rat gamma-aminobutyric acid (GABA) B receptor, 1 | AI227854 | 7.062E-07 | 1.63 |
|----------------------------------------------------------------------------|----------|-----------|------|

|                                                                                                           |          |           |       |
|-----------------------------------------------------------------------------------------------------------|----------|-----------|-------|
| ESTs similar to mouse IK cytokine                                                                         | AI070067 | 3.678E-08 | 1.65  |
| ESTs similar to human microtubule-associated protein, RP/EB family, member 2                              | AI176863 | 7.394E-08 | -1.71 |
| ESTs similar to mouse casein kinase II, alpha 2, polypeptide                                              | AI169125 | 1.211E-07 | 1.95  |
| HGF-regulated tyrosine kinase substrate                                                                   | AI007857 | 2.989E-07 | 1.82  |
| synaptotagmin 2 binding protein                                                                           | AI172060 | 3.375E-07 | -1.55 |
| guanine nucleotide binding protein, beta polypeptide 2                                                    | AA817892 | 5.019E-07 | 1.31  |
| ADP-ribosylation factor related protein 1                                                                 | X78603   | 2.589E-06 | -1.44 |
| vascular endothelial growth factor                                                                        | AA924335 | 3.295E-06 | -1.97 |
| adenylyl cyclase-associated protein 2                                                                     | AI145367 | 3.324E-06 | -1.54 |
| afadin (also known as myeloid/lymphoid or mixed lineage-leukemia translocation to 4 homolog) (Drosophila) | D90401   | 3.775E-06 | -1.57 |
| calcitonin gene-related peptide-receptor component protein                                                | AA799418 | 1.645E-07 | 1.74  |

### SMALL MOLECULE TRANSPORT

|                                                                                                                          |          |           |       |
|--------------------------------------------------------------------------------------------------------------------------|----------|-----------|-------|
| ESTs similar to mouse endosulfine alpha                                                                                  | AI169421 | 1.259E-12 | 3.04  |
| ESTs similar to mouse ATP-binding cassette, sub-family A (ABC1), member 1                                                | AA848829 | 2.764E-09 | 3.87  |
| ESTs similar to mouse ATP-binding cassette, sub-family A (ABC1), member 1                                                | AA848829 | 6.483E-09 | 3.30  |
| solute carrier family 25 (mitochondrial adenine nucleotide translocator) member 4                                        | D12770   | 6.636E-09 | -1.34 |
| ESTs similar to mouse endosulfine alpha                                                                                  | AI070829 | 1.704E-08 | 2.96  |
| ESTs similar to human ATP-binding cassette, sub-family C (CFTR/MRP), member 3                                            | AI009814 | 1.530E-07 | -1.80 |
| ATP-binding cassette, sub-family C (CFTR/MRP), member 1a                                                                 | X96394   | 5.983E-07 | 2.31  |
| chloride intracellular channel 5                                                                                         | AA850229 | 8.547E-07 | -2.48 |
| mRNA highly similar to rat ATP-binding cassette, sub-family C (CFTR/MRP), member 1a                                      | X90642   | 8.777E-07 | 2.64  |
| 2-oxoglutarate carrier (also known as solute carrier family 25 (mitochondrial carrier; oxoglutarate carrier), member 11) | U84727   | 1.054E-06 | -1.43 |
| ESTs similar to human endosulfine alpha                                                                                  | AI145627 | 1.139E-06 | 1.45  |
| ESTs similar to mouse solute carrier family 7 (cationic amino acid transporter, y+ system), member 8                     | AA899235 | 1.223E-06 | 2.28  |
| solute carrier family 12, member 2                                                                                       | AF051561 | 2.713E-06 | 2.24  |

### STEROID METABOLISM

|                                                                 |        |           |      |
|-----------------------------------------------------------------|--------|-----------|------|
| farnesyl diphosphate farnesyl transferase 1 (squalene synthase) | M95591 | 3.133E-06 | 1.70 |
| sulfotransferase family 1A, phenol-preferring, member 1         | L19998 | 2.414E-06 | 2.11 |

### STRESS RESPONSE

|                                                       |          |           |       |
|-------------------------------------------------------|----------|-----------|-------|
| ESTs similar to mouse stress-induced phosphoprotein 1 | AA900247 | 1.211E-06 | -1.89 |
|-------------------------------------------------------|----------|-----------|-------|

## STRUCTURAL CONSTITUENT OF CYTOSKELTON

ESTs similar to mouse tubulin, alpha 4 AA800948 6.502E-07 -2.74

## STRUCTURAL CONSTITUENT OF RIBOSOME

ESTs similar to mouse ribosomal protein S6 AA955039 1.282E-07 -1.87  
kinase, 90kD, polypeptide 2

ribosomal protein L10 AA945611 1.589E-07 1.57

ESTs similar to mouse mitochondrial ribosomal protein L16 AI175221 1.642E-07 -1.46

ESTs similar to mouse ribosomal protein S6 AA858705 3.881E-07 -1.99  
kinase, 90kD, polypeptide 2

ribosomal protein L3 X62166 5.361E-07 1.48

ESTs highly similar to mouse ribosomal protein L21 AI070653 1.085E-06 -1.63

ribosomal protein L3 AA892367 1.198E-06 1.78

ESTs similar to mouse mitochondrial ribosomal protein S14 AA850451 2.904E-06 -1.34

ESTs similar to mouse mitochondrial ribosomal protein S18B AI011970 6.762E-08 -1.88

ribosomal protein L32 X06483 1.284E-07 1.34

ribosomal protein L12 X53504 3.593E-06 1.46

## TRANSPORT

ESTs weakly similar to mouse neuronal pentraxin 2 AI105049 1.051E-09 -2.31

ESTs highly similar to mouse ubiquitin-like 4 AI232649 8.570E-07 -1.83

## TUMOR ANTIGEN

ESTs weakly similar to mouse next to the Brca1 AA956140 2.198E-08 1.83

squamous cell carcinoma antigen AB014722 3.122E-08 1.75  
recognised by T cells

squamous cell carcinoma antigen AB014722 3.716E-06 1.91  
recognized by T-cells 1

## VESICLE TRANSPORT

ESTs similar to mouse kinesin family member 3c AI013107 3.489E-06 1.39

ESTs similar to mouse actin-related protein 1 homolog A (yeast) AA926303 2.370E-07 1.39

ESTs similar to mouse RAB6, member RAS oncogene family AI103834 3.486E-10 -1.85

ESTs similar to mouse golgi SNAP receptor complex member 2 AA964687 1.134E-06 1.25

ESTs similar to mouse adaptor-related protein complex AP-3, beta 1 subunit AI170332 3.198E-06 1.41

## VISION

crystallin, mu AI233209 2.287E-08 -5.96

**Supplementary Table 3.** All significant Bonferroni-adjusted probe sets with age-atrophy interactions are shown. Column 1 of the table shows the GenBank accession number of each probe set significant after the Bonferroni adjustment. The group identification (columns 2 and 3) is given by O = old; Y = Young; C = control; and T + treatment of hindlimb immobilization). Presence of the probe set on the microarray is indicated in columns 4 and 5 by: P/M = present or marginal calls, Abs = absent calls, the blue shading indicates >60% P/M calls for a given group. Mean Signal values for a treatment group and SEM for each treatment group are shown in columns 6 and 7. The p-values for each individual comparison between groups (columns 10-13 where  $p < 4.0 \times 10^{-6}$  is significant), and the relative-fold differences between groups (columns 14-17). The fold differences are listed as absolute differences by using the lower signal intensity in the denominator. Yellow shading shows fold differences >1.80. The corresponding gene names and putative functions for the following probe sets can be found in Supplementary Table 4.

| Results for Interaction Atrophy genes - Age x Group 2-way interaction effect |     |       |                                 |     |             |        |     |     |          |          |          |          |      |                           |      |      |  |
|------------------------------------------------------------------------------|-----|-------|---------------------------------|-----|-------------|--------|-----|-----|----------|----------|----------|----------|------|---------------------------|------|------|--|
| probe_set                                                                    | age | group | indicates $\geq 60\%$ P/M calls |     |             |        | SEM | age | group    | OC       | OA       | YC       | YA   | indicates $\geq 1.8$ fold |      |      |  |
|                                                                              |     |       | P/M                             | Abs | Mean Signal | OC     |     |     |          |          |          |          |      | OA                        | YC   | YA   |  |
| rc_AA900746_at                                                               | O   | C     |                                 | 5   | 12.7        | 2.069  | OC  |     | 6.98E-02 | 2.98E-05 | 5.05E-01 |          | 2.53 | 2.72                      | 1.25 |      |  |
| rc_AA900746_at                                                               | O   | T     |                                 | 4   | 5.0         | 1.489  | OT  |     | 6.98E-02 |          | 1.88E-06 | 2.11E-01 | 2.53 |                           | 6.89 | 2.03 |  |
| rc_AA900746_at                                                               | Y   | C     | 3                               | 2   | 34.6        | 3.413  | YC  |     | 2.98E-05 | 1.88E-06 |          | 8.86E-06 | 2.72 | 6.89                      |      | 3.40 |  |
| rc_AA900746_at                                                               | Y   | T     |                                 | 5   | 10.2        | 2.937  | YT  |     | 5.05E-01 | 2.11E-01 | 8.86E-06 |          | 1.25 | 2.03                      | 3.40 |      |  |
| AB007689_g_at                                                                | O   | C     |                                 | 5   | 140.4       | 8.296  | OC  |     |          | 1.60E-05 | 3.26E-02 | 2.40E-08 |      | 1.73                      | 1.16 | 3.35 |  |
| AB007689_g_at                                                                | O   | T     |                                 | 5   | 81.1        | 9.059  | OT  |     | 1.60E-05 |          | 2.86E-07 | 9.85E-04 | 1.73 |                           | 2.01 | 1.94 |  |
| AB007689_g_at                                                                | Y   | C     | 4                               | 1   | 163.2       | 5.800  | YC  |     | 3.26E-02 | 2.86E-07 |          | 1.22E-09 | 1.16 | 2.01                      |      | 3.90 |  |
| AB007689_g_at                                                                | Y   | T     |                                 | 5   | 41.9        | 2.417  | YT  |     | 2.40E-08 | 9.85E-04 | 1.22E-09 |          | 3.35 | 1.94                      | 3.90 |      |  |
| rc_AI171813_at                                                               | O   | C     |                                 | 5   | 80.3        | 6.398  | OC  |     |          | 8.26E-01 | 3.85E-06 | 7.98E-01 |      | 1.04                      | 2.10 | 1.04 |  |
| rc_AI171813_at                                                               | O   | T     |                                 | 5   | 83.2        | 12.521 | OT  |     | 8.26E-01 |          | 5.75E-06 | 9.71E-01 | 1.04 |                           | 2.03 | 1.01 |  |
| rc_AI171813_at                                                               | Y   | C     | 4                               | 1   | 168.7       | 11.231 | YC  |     | 3.85E-06 | 5.75E-06 |          | 6.15E-06 | 2.10 | 2.03                      |      | 2.02 |  |
| rc_AI171813_at                                                               | Y   | T     |                                 | 5   | 83.7        | 2.871  | YT  |     | 7.98E-01 | 9.71E-01 | 6.15E-06 |          | 1.04 | 1.01                      | 2.02 |      |  |
| rc_AI176067_s_at                                                             | O   | C     |                                 | 5   | 69.1        | 8.220  | OC  |     |          | 6.18E-03 | 1.23E-04 | 1.21E-02 |      | 2.31                      | 1.90 | 2.04 |  |
| rc_AI176067_s_at                                                             | O   | T     |                                 | 5   | 29.9        | 5.870  | OT  |     | 6.18E-03 |          | 4.14E-07 | 7.52E-01 | 2.31 |                           | 4.40 | 1.13 |  |
| rc_AI176067_s_at                                                             | Y   | C     | 5                               |     | 131.6       | 11.775 | YC  |     | 1.23E-04 | 4.14E-07 |          | 6.98E-07 | 1.90 | 4.40                      |      | 3.88 |  |
| rc_AI176067_s_at                                                             | Y   | T     |                                 | 5   | 33.9        | 8.263  | YT  |     | 1.21E-02 | 7.52E-01 | 6.98E-07 |          | 2.04 | 1.13                      | 3.88 |      |  |
| rc_AI639088_s_at                                                             | O   | C     |                                 | 5   | 21.2        | 5.611  | OC  |     |          | 2.08E-01 | 6.27E-07 | 7.09E-01 |      | 1.87                      | 3.82 | 1.16 |  |
| rc_AI639088_s_at                                                             | O   | T     |                                 | 5   | 11.3        | 3.585  | OT  |     | 2.08E-01 |          | 8.19E-08 | 3.65E-01 | 1.87 |                           | 7.15 | 1.62 |  |
| rc_AI639088_s_at                                                             | Y   | C     | 5                               |     | 80.8        | 7.877  | YC  |     | 6.27E-07 | 8.19E-08 |          | 3.40E-07 | 3.82 | 7.15                      |      | 4.41 |  |
| rc_AI639088_s_at                                                             | Y   | T     |                                 | 5   | 18.3        | 2.627  | YT  |     | 7.09E-01 | 3.65E-01 | 3.40E-07 |          | 1.16 | 1.62                      | 4.41 |      |  |
| AA686870_f_at                                                                | O   | C     |                                 | 5   | 31.0        | 4.232  | OC  |     |          | 6.66E-01 | 5.70E-06 | 3.82E-01 |      | 1.15                      | 3.01 | 1.27 |  |
| AA686870_f_at                                                                | O   | T     |                                 | 5   | 26.9        | 3.695  | OT  |     | 6.66E-01 |          | 2.61E-06 | 1.99E-01 | 1.15 |                           | 3.48 | 1.47 |  |
| AA686870_f_at                                                                | Y   | C     | 3                               | 2   | 93.5        | 9.169  | YC  |     | 5.70E-06 | 2.61E-06 |          | 3.05E-05 | 3.01 | 3.48                      |      | 2.37 |  |
| AA686870_f_at                                                                | Y   | T     | 1                               | 4   | 39.5        | 7.838  | YT  |     | 3.82E-01 | 1.99E-01 | 3.05E-05 |          | 1.27 | 1.47                      | 2.37 |      |  |
| rc_AA818372_at                                                               | O   | C     |                                 | 5   | 56.7        | 5.458  | OC  |     |          | 5.71E-01 | 2.46E-08 | 1.72E-02 |      | 1.19                      | 4.33 | 1.88 |  |
| rc_AA818372_at                                                               | O   | T     |                                 | 5   | 67.5        | 6.286  | OT  |     | 5.71E-01 |          | 5.57E-08 | 5.42E-02 | 1.19 |                           | 3.64 | 1.58 |  |
| rc_AA818372_at                                                               | Y   | C     | 3                               | 2   | 245.5       | 23.175 | YC  |     | 2.46E-08 | 5.57E-08 |          | 1.44E-06 | 4.33 | 3.64                      |      | 2.31 |  |
| rc_AA818372_at                                                               | Y   | T     | 1                               | 4   | 106.4       | 9.762  | YT  |     | 1.72E-02 | 5.42E-02 | 1.44E-06 |          | 1.88 | 1.58                      | 2.31 |      |  |

|                  |   |   |   |   |       |        |    |          |          |          |          |      |      |       |       |
|------------------|---|---|---|---|-------|--------|----|----------|----------|----------|----------|------|------|-------|-------|
| rc_AI029021_at   | O | C |   | 5 | 47.9  | 2.116  | OC |          | 1.65E-01 | 1.25E-06 | 2.23E-03 |      | 1.28 | 2.38  | 1.65  |
| rc_AI029021_at   | O | T |   | 4 | 61.1  | 7.532  | OT | 1.65E-01 |          | 3.17E-05 | 6.30E-02 | 1.28 |      | 1.86  | 1.30  |
| rc_AI029021_at   | Y | C | 3 | 2 | 113.9 | 8.918  | YC | 1.25E-06 | 3.17E-05 |          | 9.88E-04 | 2.38 | 1.86 |       | 1.44  |
| rc_AI029021_at   | Y | T | 1 | 4 | 79.2  | 4.202  | YT | 2.23E-03 | 6.30E-02 | 9.88E-04 |          | 1.65 | 1.30 | 1.44  |       |
| U68417_at        | O | C |   | 5 | 95.6  | 23.824 | OC |          | 5.48E-03 | 1.40E-01 | 5.72E-09 |      | 2.30 | 1.63  | 5.52  |
| U68417_at        | O | T |   | 5 | 219.5 | 14.235 | OT | 5.48E-03 |          | 1.18E-01 | 5.84E-07 | 2.30 |      | 1.41  | 2.40  |
| U68417_at        | Y | C |   | 5 | 155.6 | 32.357 | YC | 1.40E-01 | 1.18E-01 |          | 4.68E-08 | 1.63 | 1.41 |       | 3.39  |
| U68417_at        | Y | T | 3 | 2 | 527.2 | 34.137 | YT | 5.72E-09 | 5.84E-07 | 4.68E-08 |          | 5.52 | 2.40 | 3.39  |       |
| rc_AA926262_s_at | O | C |   | 5 | 144.9 | 9.369  | OC |          | 3.60E-01 | 2.01E-06 | 3.25E-01 |      | 1.30 | 2.71  | 1.23  |
| rc_AA926262_s_at | O | T |   | 4 | 111.6 | 12.788 | OT | 3.60E-01 |          | 8.90E-07 | 7.61E-02 | 1.30 |      | 3.52  | 1.60  |
| rc_AA926262_s_at | Y | C | 5 |   | 392.7 | 39.548 | YC | 2.01E-06 | 8.90E-07 |          | 1.11E-05 | 2.71 | 3.52 |       | 2.20  |
| rc_AA926262_s_at | Y | T | 3 | 2 | 178.7 | 17.861 | YT | 3.25E-01 | 7.61E-02 | 1.11E-05 |          | 1.23 | 1.60 | 2.20  |       |
| rc_AA891950_at   | O | C |   | 5 | 62.9  | 4.621  | OC |          | 7.88E-03 | 5.44E-02 | 1.03E-05 |      | 1.36 | 1.33  | 1.76  |
| rc_AA891950_at   | O | T |   | 5 | 85.8  | 2.260  | OT | 7.88E-03 |          | 1.05E-04 | 4.75E-03 | 1.36 |      | 1.82  | 1.29  |
| rc_AA891950_at   | Y | C |   | 5 | 47.3  | 6.732  | YC | 5.44E-02 | 1.05E-04 |          | 2.99E-07 | 1.33 | 1.82 |       | 2.34  |
| rc_AA891950_at   | Y | T | 5 |   | 110.5 | 6.485  | YT | 1.03E-05 | 4.75E-03 | 2.99E-07 |          | 1.76 | 1.29 | 2.34  |       |
| rc_AI070446_at   | O | C |   | 5 | 9.7   | 4.124  | OC |          | 2.10E-02 | 5.53E-01 | 4.97E-08 |      | 2.23 | 1.29  | 5.61  |
| rc_AI070446_at   | O | T |   | 5 | 21.7  | 3.782  | OT | 2.10E-02 |          | 6.87E-02 | 2.88E-06 | 2.23 |      | 1.73  | 2.51  |
| rc_AI070446_at   | Y | C |   | 5 | 12.6  | 2.893  | YC | 5.53E-01 | 6.87E-02 |          | 1.21E-07 | 1.29 | 1.73 |       | 4.34  |
| rc_AI070446_at   | Y | T | 5 |   | 54.6  | 2.042  | YT | 4.97E-08 | 2.88E-06 | 1.21E-07 |          | 5.61 | 2.51 | 4.34  |       |
| U32314_g_at      | O | C |   | 5 | 20.1  | 1.737  | OC |          | 2.84E-01 | 1.16E-01 | 3.27E-06 |      | 1.20 | 1.30  | 2.26  |
| U32314_g_at      | O | T |   | 5 | 24.1  | 2.268  | OT | 2.84E-01 |          | 5.89E-01 | 2.50E-05 | 1.20 |      | 1.08  | 1.88  |
| U32314_g_at      | Y | C |   | 5 | 26.1  | 1.567  | YC | 1.16E-01 | 5.89E-01 |          | 7.32E-05 | 1.30 | 1.08 |       | 1.74  |
| U32314_g_at      | Y | T | 5 |   | 45.3  | 3.959  | YT | 3.27E-06 | 2.50E-05 | 7.32E-05 |          | 2.26 | 1.88 | 1.74  |       |
| rc_AI232103_at   | O | C |   | 5 | 144.9 | 10.041 | OC |          | 3.72E-01 | 6.59E-06 | 5.52E-01 |      | 1.14 | 1.89  | 1.08  |
| rc_AI232103_at   | O | T |   | 5 | 126.9 | 12.250 | OT | 3.72E-01 |          | 1.32E-06 | 1.46E-01 | 1.14 |      | 2.16  | 1.24  |
| rc_AI232103_at   | Y | C | 5 |   | 273.4 | 17.371 | YC | 6.59E-06 | 1.32E-06 |          | 2.04E-05 | 1.89 | 2.16 |       | 1.74  |
| rc_AI232103_at   | Y | T | 5 |   | 156.8 | 14.693 | YT | 5.52E-01 | 1.46E-01 | 2.04E-05 |          | 1.08 | 1.24 | 1.74  |       |
| rc_AA943010_at   | O | C | 1 | 4 | 259.6 | 25.763 | OC |          | 1.57E-01 | 1.39E-05 | 4.27E-01 |      | 1.63 | 2.55  | 1.25  |
| rc_AA943010_at   | O | T |   | 4 | 159.1 | 8.700  | OT | 1.57E-01 |          | 2.07E-06 | 4.83E-01 | 1.63 |      | 4.16  | 1.31  |
| rc_AA943010_at   | Y | C | 5 |   | 661.3 | 82.211 | YC | 1.39E-05 | 2.07E-06 |          | 3.45E-06 | 2.55 | 4.16 |       | 3.18  |
| rc_AA943010_at   | Y | T |   | 5 | 207.7 | 11.154 | YT | 4.27E-01 | 4.83E-01 | 3.45E-06 |          | 1.25 | 1.31 | 3.18  |       |
| AA848563_s_at    | O | C | 5 |   | 228.8 | 21.825 | OC |          | 2.47E-07 | 6.97E-06 | 1.34E-07 |      | ###  | 3.49  | ###   |
| AA848563_s_at    | O | T |   | 5 | 16.1  | 6.448  | OT | 2.47E-07 |          | 6.49E-02 | 6.96E-01 | ###  |      | 4.09  | 2.62  |
| AA848563_s_at    | Y | C |   | 5 | 65.6  | 27.047 | YC | 6.97E-06 | 6.49E-02 |          | 3.01E-02 | 3.49 | 4.09 |       | ###   |
| AA848563_s_at    | Y | T |   | 5 | 6.1   | 1.040  | YT | 1.34E-07 | 6.96E-01 | 3.01E-02 |          | ###  | 2.62 | ###   |       |
| S66024_at        | O | C | 5 |   | 52.8  | 4.068  | OC |          | 1.56E-08 | 1.76E-06 | 5.03E-09 |      | 5.47 | 2.34  | 8.69  |
| S66024_at        | O | T |   | 5 | 9.7   | 1.155  | OT | 1.56E-08 |          | 6.77E-03 | 4.00E-01 | 5.47 |      | 2.33  | 1.59  |
| S66024_at        | Y | C | 1 | 4 | 22.5  | 3.212  | YC | 1.76E-06 | 6.77E-03 |          | 1.10E-03 | 2.34 | 2.33 |       | 3.71  |
| S66024_at        | Y | T |   | 5 | 6.1   | 2.481  | YT | 5.03E-09 | 4.00E-01 | 1.10E-03 |          | 8.69 | 1.59 | 3.71  |       |
| rc_AI639060_at   | O | C | 5 |   | 510.8 | 58.485 | OC |          | 7.41E-08 | 2.48E-05 | 1.69E-08 |      | 7.43 | 2.19  | ###   |
| rc_AI639060_at   | O | T |   | 5 | 68.8  | 20.819 | OT | 7.41E-08 |          | 3.23E-03 | 3.10E-01 | 7.43 |      | 3.39  | 3.63  |
| rc_AI639060_at   | Y | C | 5 |   | 233.1 | 25.033 | YC | 2.48E-05 | 3.23E-03 |          | 3.57E-04 | 2.19 | 3.39 |       | 12.31 |
| rc_AI639060_at   | Y | T |   | 5 | 18.9  | 5.704  | YT | 1.69E-08 | 3.10E-01 | 3.57E-04 |          | ###  | 3.63 | 12.31 |       |

|                  |   |   |   |   |        |         |    |          |          |          |          |      |      |      |      |
|------------------|---|---|---|---|--------|---------|----|----------|----------|----------|----------|------|------|------|------|
| X77209_at        | O | C | 4 | 1 | 41.3   | 3.270   | OC |          | 9.24E-04 | 3.75E-04 | 9.76E-05 |      | 1.55 | 1.39 | 1.82 |
| X77209_at        | O | T | 1 | 4 | 26.7   | 2.121   | OT | 9.24E-04 |          | 2.36E-07 | 2.90E-01 | 1.55 |      | 2.15 | 1.17 |
| X77209_at        | Y | C | 5 |   | 57.4   | 1.966   | YC | 3.75E-04 | 2.36E-07 |          | 4.62E-08 | 1.39 | 2.15 |      | 2.53 |
| X77209_at        | Y | T | 2 | 3 | 22.7   | 2.627   | YT | 9.76E-05 | 2.90E-01 | 4.62E-08 |          | 1.82 | 1.17 | 2.53 |      |
| rc_AA996896_at   | O | C | 5 |   | 123.1  | 4.259   | OC |          | 1.58E-05 | 8.94E-08 | 1.23E-07 |      | 1.60 | 2.18 | 2.12 |
| rc_AA996896_at   | O | T | 1 | 3 | 77.0   | 5.464   | OT | 1.58E-05 |          | 1.41E-02 | 2.18E-02 | 1.60 |      | 1.36 | 1.33 |
| rc_AA996896_at   | Y | C | 1 | 4 | 56.5   | 5.306   | YC | 8.94E-08 | 1.41E-02 |          | 8.19E-01 | 2.18 | 1.36 |      | 1.03 |
| rc_AA996896_at   | Y | T |   | 5 | 58.1   | 5.171   | YT | 1.23E-07 | 2.18E-02 | 8.19E-01 |          | 2.12 | 1.33 | 1.03 |      |
| rc_AI171466_at   | O | C | 5 |   | 1378.5 | 118.054 | OC |          | 4.26E-06 | 1.29E-07 | 1.37E-07 |      | 3.40 | 1.93 | ###  |
| rc_AI171466_at   | O | T | 1 | 4 | 405.0  | 52.295  | OT | 4.26E-06 |          | 3.72E-11 | 5.29E-02 | 3.40 |      | 6.56 | 3.83 |
| rc_AI171466_at   | Y | C | 5 |   | 2657.4 | 153.417 | YC | 1.29E-07 | 3.72E-11 |          | 5.60E-12 | 1.93 | 6.56 |      | ###  |
| rc_AI171466_at   | Y | T |   | 5 | 105.8  | 27.854  | YT | 1.37E-07 | 5.29E-02 | 5.60E-12 |          | ###  | 3.83 | ###  |      |
| rc_AA946449_at   | O | C |   | 5 | 72.6   | 4.949   | OC |          | 1.60E-03 | 7.95E-02 | 3.17E-09 |      | 1.44 | 1.20 | 2.32 |
| rc_AA946449_at   | O | T | 2 | 2 | 104.4  | 2.703   | OT | 1.60E-03 |          | 5.62E-02 | 1.31E-06 | 1.44 |      | 1.20 | 1.61 |
| rc_AA946449_at   | Y | C |   | 5 | 87.3   | 4.177   | YC | 7.95E-02 | 5.62E-02 |          | 3.00E-08 | 1.20 | 1.20 |      | 1.93 |
| rc_AA946449_at   | Y | T | 5 |   | 168.4  | 8.237   | YT | 3.17E-09 | 1.31E-06 | 3.00E-08 |          | 2.32 | 1.61 | 1.93 |      |
| rc_AA942906_s_at | O | C |   | 5 | 66.5   | 13.636  | OC |          | 1.57E-01 | 4.69E-08 | 4.65E-04 |      | 1.53 | 4.39 | 2.50 |
| rc_AA942906_s_at | O | T | 2 | 2 | 101.9  | 7.156   | OT | 1.57E-01 |          | 8.85E-07 | 1.62E-02 | 1.53 |      | 2.86 | 1.63 |
| rc_AA942906_s_at | Y | C | 5 |   | 291.5  | 13.990  | YC | 4.69E-08 | 8.85E-07 |          | 5.11E-05 | 4.39 | 2.86 |      | 1.75 |
| rc_AA942906_s_at | Y | T | 5 |   | 166.2  | 22.977  | YT | 4.65E-04 | 1.62E-02 | 5.11E-05 |          | 2.50 | 1.63 | 1.75 |      |
| U17697_s_at      | O | C | 2 | 3 | 50.0   | 2.336   | OC |          | 1.30E-03 | 5.30E-07 | 6.63E-01 |      | 1.31 | 1.48 | 1.03 |
| U17697_s_at      | O | T | 2 | 3 | 38.3   | 1.786   | OT | 1.30E-03 |          | 2.27E-09 | 3.31E-03 | 1.31 |      | 1.94 | 1.27 |
| U17697_s_at      | Y | C | 4 | 1 | 74.2   | 1.948   | YC | 5.30E-07 | 2.27E-09 |          | 2.61E-07 | 1.48 | 1.94 |      | 1.53 |
| U17697_s_at      | Y | T | 4 | 1 | 48.7   | 2.400   | YT | 6.63E-01 | 3.31E-03 | 2.61E-07 |          | 1.03 | 1.27 | 1.53 |      |
| rc_AI180353_at   | O | C | 4 | 1 | 44.3   | 3.090   | OC |          | 1.11E-02 | 7.13E-09 | 3.84E-01 |      | 1.55 | 2.36 | 1.12 |
| rc_AI180353_at   | O | T | 2 | 3 | 28.6   | 0.614   | OT | 1.11E-02 |          | 2.45E-10 | 6.57E-02 | 1.55 |      | 3.66 | 1.38 |
| rc_AI180353_at   | Y | C | 5 |   | 104.6  | 6.238   | YC | 7.13E-09 | 2.45E-10 |          | 2.32E-09 | 2.36 | 3.66 |      | 2.65 |
| rc_AI180353_at   | Y | T | 4 | 1 | 39.4   | 3.341   | YT | 3.84E-01 | 6.57E-02 | 2.32E-09 |          | 1.12 | 1.38 | 2.65 |      |
| rc_AI172334_at   | O | C | 5 |   | 436.8  | 18.098  | OC |          | 2.23E-06 | 2.47E-07 | 1.58E-08 |      | 1.99 | 2.43 | 3.58 |
| rc_AI172334_at   | O | T | 2 | 3 | 220.0  | 22.516  | OT | 2.23E-06 |          | 1.99E-01 | 5.20E-03 | 1.99 |      | 1.23 | 1.80 |
| rc_AI172334_at   | Y | C | 1 | 4 | 179.4  | 23.764  | YC | 2.47E-07 | 1.99E-01 |          | 7.65E-02 | 2.43 | 1.23 |      | 1.47 |
| rc_AI172334_at   | Y | T |   | 5 | 122.1  | 20.774  | YT | 1.58E-08 | 5.20E-03 | 7.65E-02 |          | 3.58 | 1.80 | 1.47 |      |
| rc_AA943734_at   | O | C | 5 |   | 107.2  | 2.472   | OC |          | 5.58E-03 | 5.75E-05 | 8.35E-04 |      | 1.54 | 1.57 | 1.74 |
| rc_AA943734_at   | O | T | 2 | 2 | 69.6   | 10.442  | OT | 5.58E-03 |          | 4.37E-07 | 5.00E-01 | 1.54 |      | 2.41 | 1.13 |
| rc_AA943734_at   | Y | C | 5 |   | 167.9  | 10.648  | YC | 5.75E-05 | 4.37E-07 |          | 7.51E-08 | 1.57 | 2.41 |      | 2.73 |
| rc_AA943734_at   | Y | T |   | 5 | 61.5   | 6.399   | YT | 8.35E-04 | 5.00E-01 | 7.51E-08 |          | 1.74 | 1.13 | 2.73 |      |
| rc_AI229412_at   | O | C | 5 |   | 268.4  | 18.774  | OC |          | 6.27E-10 | 8.49E-07 | 2.42E-10 |      | 6.61 | 2.02 | ###  |
| rc_AI229412_at   | O | T | 2 | 3 | 40.6   | 3.652   | OT | 6.27E-10 |          | 7.50E-05 | 3.99E-01 | 6.61 |      | 3.28 | 1.60 |
| rc_AI229412_at   | Y | C | 5 |   | 132.9  | 15.285  | YC | 8.49E-07 | 7.50E-05 |          | 1.41E-05 | 2.02 | 3.28 |      | 5.23 |
| rc_AI229412_at   | Y | T |   | 5 | 25.4   | 3.612   | YT | 2.42E-10 | 3.99E-01 | 1.41E-05 |          | ###  | 1.60 | 5.23 |      |
| rc_AI071855_at   | O | C |   | 5 | 47.7   | 5.532   | OC |          | 4.85E-01 | 4.28E-01 | 1.63E-05 |      | 1.09 | 1.12 | 1.80 |
| rc_AI071855_at   | O | T | 3 | 2 | 52.2   | 3.117   | OT | 4.85E-01 |          | 1.46E-01 | 6.46E-05 | 1.09 |      | 1.23 | 1.65 |
| rc_AI071855_at   | Y | C |   | 5 | 42.6   | 3.705   | YC | 4.28E-01 | 1.46E-01 |          | 3.69E-06 | 1.12 | 1.23 |      | 2.02 |
| rc_AI071855_at   | Y | T | 4 | 1 | 86.1   | 5.094   | YT | 1.63E-05 | 6.46E-05 | 3.69E-06 |          | 1.80 | 1.65 | 2.02 |      |



|                  |   |   |   |   |       |        |    |          |          |          |          |      |      |      |      |
|------------------|---|---|---|---|-------|--------|----|----------|----------|----------|----------|------|------|------|------|
| rc_AA859543_at   | O | C |   | 5 | 23.8  | 2.219  | OC |          | 6.55E-04 | 6.07E-03 | 1.47E-05 |      | 2.01 | 4.09 | 2.46 |
| rc_AA859543_at   | O | T | 3 | 2 | 47.8  | 4.805  | OT | 6.55E-04 |          | 1.56E-06 | 7.50E-02 | 2.01 |      | 8.21 | 1.23 |
| rc_AA859543_at   | Y | C |   | 5 | 5.8   | 1.970  | YC | 6.07E-03 | 1.56E-06 |          | 7.67E-08 | 4.09 | 8.21 |      | ###  |
| rc_AA859543_at   | Y | T | 5 |   | 58.6  | 5.734  | YT | 1.47E-05 | 7.50E-02 | 7.67E-08 |          | 2.46 | 1.23 | ###  |      |
| M31837_at        | O | C |   | 5 | 24.8  | 4.609  | OC |          | 8.88E-02 | 2.33E-02 | 1.26E-07 |      | 1.62 | 1.85 | 4.05 |
| M31837_at        | O | T | 3 | 2 | 40.1  | 4.026  | OT | 8.88E-02 |          | 4.96E-01 | 2.36E-06 | 1.62 |      | 1.15 | 2.50 |
| M31837_at        | Y | C | 4 | 1 | 46.0  | 3.398  | YC | 2.33E-02 | 4.96E-01 |          | 8.18E-06 | 1.85 | 1.15 |      | 2.18 |
| M31837_at        | Y | T | 5 |   | 100.3 | 9.676  | YT | 1.26E-07 | 2.36E-06 | 8.18E-06 |          | 4.05 | 2.50 | 2.18 |      |
| rc_AI228132_i_at | O | C |   | 5 | 34.2  | 1.582  | OC |          | 9.59E-01 | 1.99E-06 | 2.42E-02 |      | 1.01 | 2.55 | 1.53 |
| rc_AI228132_i_at | O | T | 3 | 2 | 33.8  | 1.562  | OT | 9.59E-01 |          | 1.82E-06 | 2.18E-02 | 1.01 |      | 2.58 | 1.55 |
| rc_AI228132_i_at | Y | C | 5 |   | 87.1  | 8.614  | YC | 1.99E-06 | 1.82E-06 |          | 2.20E-04 | 2.55 | 2.58 |      | 1.66 |
| rc_AI228132_i_at | Y | T | 5 |   | 52.4  | 5.286  | YT | 2.42E-02 | 2.18E-02 | 2.20E-04 |          | 1.53 | 1.55 | 1.66 |      |
| AJ005396_at      | O | C | 1 | 4 | 7.7   | 0.946  | OC |          | 8.50E-01 | 2.94E-06 | 1.25E-02 |      | 1.10 | 4.77 | 2.51 |
| AJ005396_at      | O | T | 3 | 2 | 8.5   | 1.086  | OT | 8.50E-01 |          | 4.14E-06 | 1.85E-02 | 1.10 |      | 4.32 | 2.28 |
| AJ005396_at      | Y | C | 5 |   | 36.8  | 4.764  | YC | 2.94E-06 | 4.14E-06 |          | 6.84E-04 | 4.77 | 4.32 |      | 1.90 |
| AJ005396_at      | Y | T | 4 | 1 | 19.4  | 3.113  | YT | 1.25E-02 | 1.85E-02 | 6.84E-04 |          | 2.51 | 2.28 | 1.90 |      |
| AF080568_at      | O | C | 2 | 3 | 149.8 | 4.444  | OC |          | 1.15E-02 | 1.97E-04 | 1.19E-02 |      | 1.25 | 1.34 | 1.25 |
| AF080568_at      | O | T | 3 | 2 | 119.9 | 6.632  | OT | 1.15E-02 |          | 9.86E-07 | 9.88E-01 | 1.25 |      | 1.67 | 1.00 |
| AF080568_at      | Y | C | 5 |   | 200.2 | 5.610  | YC | 1.97E-04 | 9.86E-07 |          | 1.01E-06 | 1.34 | 1.67 |      | 1.67 |
| AF080568_at      | Y | T | 4 | 1 | 120.1 | 11.192 | YT | 1.19E-02 | 9.88E-01 | 1.01E-06 |          | 1.25 | 1.00 | 1.67 |      |
| AB000507_at      | O | C | 3 | 2 | 159.8 | 16.140 | OC |          | 1.77E-01 | 3.80E-07 | 8.88E-02 |      | 1.22 | 2.04 | 1.30 |
| AB000507_at      | O | T | 3 | 2 | 131.3 | 6.754  | OT | 1.77E-01 |          | 4.51E-08 | 6.94E-01 | 1.22 |      | 2.48 | 1.07 |
| AB000507_at      | Y | C | 5 |   | 326.1 | 21.667 | YC | 3.80E-07 | 4.51E-08 |          | 2.57E-08 | 2.04 | 2.48 |      | 2.65 |
| AB000507_at      | Y | T |   | 5 | 123.2 | 6.295  | YT | 8.88E-02 | 6.94E-01 | 2.57E-08 |          | 1.30 | 1.07 | 2.65 |      |
| AB007690_s_at    | O | C | 5 |   | 255.4 | 14.281 | OC |          | 1.05E-06 | 5.52E-06 | 2.95E-08 |      | 2.52 | 1.53 | 4.72 |
| AB007690_s_at    | O | T | 3 | 2 | 101.3 | 7.871  | OT | 1.05E-06 |          | 1.61E-10 | 3.30E-02 | 2.52 |      | 3.85 | 1.87 |
| AB007690_s_at    | Y | C | 5 |   | 390.1 | 21.307 | YC | 5.52E-06 | 1.61E-10 |          | 1.65E-11 | 1.53 | 3.85 |      | 7.22 |
| AB007690_s_at    | Y | T |   | 5 | 54.1  | 9.970  | YT | 2.95E-08 | 3.30E-02 | 1.65E-11 |          | 4.72 | 1.87 | 7.22 |      |
| rc_AA946124_at   | O | C | 5 |   | 209.4 | 5.641  | OC |          | 9.22E-07 | 1.01E-01 | 4.00E-02 |      | 1.94 | 1.11 | 1.15 |
| rc_AA946124_at   | O | T | 3 | 1 | 107.9 | 11.873 | OT | 9.22E-07 |          | 1.40E-05 | 3.28E-05 | 1.94 |      | 1.75 | 1.69 |
| rc_AA946124_at   | Y | C | 5 |   | 188.4 | 9.790  | YC | 1.01E-01 | 1.40E-05 |          | 6.22E-01 | 1.11 | 1.75 |      | 1.03 |
| rc_AA946124_at   | Y | T | 4 | 1 | 182.4 | 7.698  | YT | 4.00E-02 | 3.28E-05 | 6.22E-01 |          | 1.15 | 1.69 | 1.03 |      |
| rc_AI228284_at   | O | C | 5 |   | 242.4 | 15.646 | OC |          | 7.07E-03 | 8.83E-04 | 4.87E-03 |      | 1.59 | 1.49 | 1.65 |
| rc_AI228284_at   | O | T | 3 | 2 | 152.1 | 14.193 | OT | 7.07E-03 |          | 2.26E-06 | 8.62E-01 | 1.59 |      | 2.38 | 1.04 |
| rc_AI228284_at   | Y | C | 5 |   | 361.6 | 34.068 | YC | 8.83E-04 | 2.26E-06 |          | 1.67E-06 | 1.49 | 2.38 |      | 2.46 |
| rc_AI228284_at   | Y | T | 4 | 1 | 146.9 | 10.187 | YT | 4.87E-03 | 8.62E-01 | 1.67E-06 |          | 1.65 | 1.04 | 2.46 |      |
| Z12152_at        | O | C |   | 5 | 29.3  | 3.608  | OC |          | 3.43E-04 | 4.99E-04 | 5.67E-04 |      | 1.65 | 2.68 | 2.61 |
| Z12152_at        | O | T | 4 | 1 | 48.4  | 2.679  | OT | 3.43E-04 |          | 1.41E-07 | 1.54E-07 | 1.65 |      | 4.42 | 4.32 |
| Z12152_at        | Y | C |   | 5 | 11.0  | 3.130  | YC | 4.99E-04 | 1.41E-07 |          | 9.52E-01 | 2.68 | 4.42 |      | 1.02 |
| Z12152_at        | Y | T |   | 5 | 11.2  | 2.383  | YT | 5.67E-04 | 1.54E-07 | 9.52E-01 |          | 2.61 | 4.32 | 1.02 |      |
| rc_AA925744_g_at | O | C |   | 5 | 236.2 | 11.234 | OC |          | 6.90E-04 | 9.08E-02 | 7.07E-07 |      | 1.61 | 1.32 | 2.10 |
| rc_AA925744_g_at | O | T | 4 |   | 380.5 | 39.590 | OT | 6.90E-04 |          | 2.61E-05 | 3.89E-03 | 1.61 |      | 2.13 | 1.30 |
| rc_AA925744_g_at | Y | C |   | 5 | 178.5 | 20.905 | YC | 9.08E-02 | 2.61E-05 |          | 5.44E-08 | 1.32 | 2.13 |      | 2.78 |
| rc_AA925744_g_at | Y | T | 5 |   | 496.0 | 20.287 | YT | 7.07E-07 | 3.89E-03 | 5.44E-08 |          | 2.10 | 1.30 | 2.78 |      |

|                  |   |   |   |   |       |        |    |          |          |          |          |      |      |      |      |
|------------------|---|---|---|---|-------|--------|----|----------|----------|----------|----------|------|------|------|------|
| rc_AA926200_at   | O | C |   | 5 | 80.3  | 7.712  | OC |          | 1.43E-05 | 7.33E-01 | 4.04E-10 |      | 4.08 | 1.19 | 7.56 |
| rc_AA926200_at   | O | T | 4 |   | 327.2 | 23.276 | OT | 1.43E-05 |          | 8.08E-06 | 3.47E-06 | 4.08 |      | 4.85 | 1.85 |
| rc_AA926200_at   | Y | C |   | 5 | 67.4  | 11.423 | YC | 7.33E-01 | 8.08E-06 |          | 2.88E-10 | 1.19 | 4.85 |      | 9.00 |
| rc_AA926200_at   | Y | T | 5 |   | 606.6 | 45.248 | YT | 4.04E-10 | 3.47E-06 | 2.88E-10 |          | 7.56 | 1.85 | 9.00 |      |
| rc_AA849720_at   | O | C | 1 | 4 | 274.2 | 9.823  | OC |          | 2.87E-03 | 7.33E-01 | 1.06E-06 |      | 1.31 | 1.03 | 1.64 |
| rc_AA849720_at   | O | T | 4 |   | 358.8 | 23.120 | OT | 2.87E-03 |          | 1.46E-03 | 1.55E-03 | 1.31 |      | 1.35 | 1.26 |
| rc_AA849720_at   | Y | C |   | 5 | 266.4 | 6.999  | YC | 7.33E-01 | 1.46E-03 |          | 6.21E-07 | 1.03 | 1.35 |      | 1.69 |
| rc_AA849720_at   | Y | T | 5 |   | 450.5 | 21.803 | YT | 1.06E-06 | 1.55E-03 | 6.21E-07 |          | 1.64 | 1.26 | 1.69 |      |
| X65948_at        | O | C | 2 | 3 | 47.8  | 2.219  | OC |          | 2.07E-03 | 5.25E-01 | 1.74E-07 |      | 1.45 | 1.08 | 2.06 |
| X65948_at        | O | T | 4 | 1 | 69.2  | 3.987  | OT | 2.07E-03 |          | 8.11E-03 | 1.15E-04 | 1.45 |      | 1.34 | 1.43 |
| X65948_at        | Y | C |   | 5 | 51.6  | 4.123  | YC | 5.25E-01 | 8.11E-03 |          | 4.81E-07 | 1.08 | 1.34 |      | 1.91 |
| X65948_at        | Y | T | 5 |   | 98.7  | 5.468  | YT | 1.74E-07 | 1.15E-04 | 4.81E-07 |          | 2.06 | 1.43 | 1.91 |      |
| rc_AA964962_at   | O | C | 3 | 2 | 73.1  | 8.997  | OC |          | 1.71E-10 | 3.22E-01 | 7.19E-08 |      | 3.49 | 1.19 | 2.51 |
| rc_AA964962_at   | O | T | 4 |   | 255.3 | 4.576  | OT | 1.71E-10 |          | 7.11E-11 | 2.58E-05 | 3.49 |      | 4.16 | 1.39 |
| rc_AA964962_at   | Y | C |   | 5 | 61.4  | 5.677  | YC | 3.22E-01 | 7.11E-11 |          | 1.91E-08 | 1.19 | 4.16 |      | 2.99 |
| rc_AA964962_at   | Y | T | 5 |   | 183.5 | 10.763 | YT | 7.19E-08 | 2.58E-05 | 1.91E-08 |          | 2.51 | 1.39 | 2.99 |      |
| rc_AA963167_at   | O | C | 3 | 2 | 249.9 | 21.103 | OC |          | 2.45E-02 | 3.58E-02 | 1.00E-04 |      | 1.27 | 1.30 | 1.53 |
| rc_AA963167_at   | O | T | 4 |   | 316.9 | 20.336 | OT | 2.45E-02 |          | 3.00E-04 | 2.77E-02 | 1.27 |      | 1.65 | 1.21 |
| rc_AA963167_at   | Y | C | 2 | 3 | 191.6 | 14.036 | YC | 3.58E-02 | 3.00E-04 |          | 1.76E-06 | 1.30 | 1.65 |      | 1.99 |
| rc_AA963167_at   | Y | T | 5 |   | 382.2 | 17.515 | YT | 1.00E-04 | 2.77E-02 | 1.76E-06 |          | 1.53 | 1.21 | 1.99 |      |
| rc_AI009996_at   | O | C | 4 | 1 | 64.6  | 6.961  | OC |          | 7.89E-05 | 6.76E-03 | 6.10E-02 |      | 1.80 | 1.79 | 1.40 |
| rc_AI009996_at   | O | T | 4 |   | 116.3 | 7.107  | OT | 7.89E-05 |          | 5.27E-07 | 2.73E-06 | 1.80 |      | 3.23 | 2.52 |
| rc_AI009996_at   | Y | C |   | 5 | 36.0  | 8.558  | YC | 6.76E-03 | 5.27E-07 |          | 2.83E-01 | 1.79 | 3.23 |      | 1.28 |
| rc_AI009996_at   | Y | T | 3 | 2 | 46.2  | 1.672  | YT | 6.10E-02 | 2.73E-06 | 2.83E-01 |          | 1.40 | 2.52 | 1.28 |      |
| rc_AI230130_g_at | O | C | 4 | 1 | 91.4  | 4.819  | OC |          | 6.86E-01 | 2.51E-06 | 1.54E-01 |      | 1.04 | 1.62 | 1.13 |
| rc_AI230130_g_at | O | T | 4 | 1 | 88.1  | 3.579  | OT | 6.86E-01 |          | 1.24E-06 | 7.42E-02 | 1.04 |      | 1.68 | 1.17 |
| rc_AI230130_g_at | Y | C | 5 |   | 148.3 | 7.221  | YC | 2.51E-06 | 1.24E-06 |          | 3.97E-05 | 1.62 | 1.68 |      | 1.43 |
| rc_AI230130_g_at | Y | T | 3 | 2 | 103.4 | 6.336  | YT | 1.54E-01 | 7.42E-02 | 3.97E-05 |          | 1.13 | 1.17 | 1.43 |      |
| rc_AA850672_at   | O | C | 4 | 1 | 62.7  | 3.811  | OC |          | 2.57E-04 | 5.10E-02 | 9.73E-07 |      | 1.55 | 1.30 | 1.86 |
| rc_AA850672_at   | O | T | 4 |   | 97.0  | 5.147  | OT | 2.57E-04 |          | 6.51E-06 | 1.59E-02 | 1.55 |      | 2.01 | 1.20 |
| rc_AA850672_at   | Y | C | 1 | 4 | 48.3  | 3.759  | YC | 5.10E-02 | 6.51E-06 |          | 4.73E-08 | 1.30 | 2.01 |      | 2.41 |
| rc_AA850672_at   | Y | T | 5 |   | 116.5 | 6.492  | YT | 9.73E-07 | 1.59E-02 | 4.73E-08 |          | 1.86 | 1.20 | 2.41 |      |
| rc_AA946411_at   | O | C | 5 |   | 525.1 | 30.361 | OC |          | 2.84E-02 | 3.03E-01 | 8.11E-06 |      | 1.22 | 1.07 | 1.85 |
| rc_AA946411_at   | O | T | 4 |   | 431.8 | 27.641 | OT | 2.84E-02 |          | 3.73E-03 | 1.67E-03 | 1.22 |      | 1.31 | 1.52 |
| rc_AA946411_at   | Y | C | 5 |   | 563.8 | 21.868 | YC | 3.03E-01 | 3.73E-03 |          | 1.40E-06 | 1.07 | 1.31 |      | 1.98 |
| rc_AA946411_at   | Y | T | 1 | 4 | 284.6 | 24.793 | YT | 8.11E-06 | 1.67E-03 | 1.40E-06 |          | 1.85 | 1.52 | 1.98 |      |
| rc_AI232409_at   | O | C | 5 |   | 125.2 | 5.422  | OC |          | 2.04E-03 | 4.37E-04 | 6.80E-06 |      | 1.46 | 1.38 | 2.25 |
| rc_AI232409_at   | O | T | 4 | 1 | 86.0  | 6.861  | OT | 2.04E-03 |          | 4.81E-07 | 1.13E-02 | 1.46 |      | 2.00 | 1.55 |
| rc_AI232409_at   | Y | C | 5 |   | 172.2 | 7.960  | YC | 4.37E-04 | 4.81E-07 |          | 7.65E-09 | 1.38 | 2.00 |      | 3.10 |
| rc_AI232409_at   | Y | T | 2 | 3 | 55.5  | 9.329  | YT | 6.80E-06 | 1.13E-02 | 7.65E-09 |          | 2.25 | 1.55 | 3.10 |      |
| AB007689_at      | O | C | 5 |   | 381.0 | 24.431 | OC |          | 1.27E-06 | 1.39E-05 | 5.77E-08 |      | 2.03 | 1.42 | 2.78 |
| AB007689_at      | O | T | 4 | 1 | 187.8 | 8.786  | OT | 1.27E-06 |          | 3.10E-10 | 6.57E-02 | 2.03 |      | 2.87 | 1.37 |
| AB007689_at      | Y | C | 5 |   | 539.5 | 24.399 | YC | 1.39E-05 | 3.10E-10 |          | 4.12E-11 | 1.42 | 2.87 |      | 3.94 |
| AB007689_at      | Y | T | 3 | 2 | 137.0 | 7.575  | YT | 5.77E-08 | 6.57E-02 | 4.12E-11 |          | 2.78 | 1.37 | 3.94 |      |

|                  |   |   |   |   |        |         |    |          |          |          |          |      |      |      |      |
|------------------|---|---|---|---|--------|---------|----|----------|----------|----------|----------|------|------|------|------|
| rc_AA963077_at   | O | C | 5 |   | 72.4   | 8.398   | OC |          | 1.65E-06 | 8.12E-01 | 1.84E-03 |      | 2.87 | 1.06 | 1.88 |
| rc_AA963077_at   | O | T | 4 |   | 207.9  | 24.442  | OT | 1.65E-06 |          | 2.39E-06 | 1.10E-03 | 2.87 |      | 2.72 | 1.53 |
| rc_AA963077_at   | Y | C | 4 | 1 | 76.5   | 6.712   | YC | 8.12E-01 | 2.39E-06 |          | 3.01E-03 | 1.06 | 2.72 |      | 1.78 |
| rc_AA963077_at   | Y | T | 5 |   | 136.0  | 7.609   | YT | 1.84E-03 | 1.10E-03 | 3.01E-03 |          | 1.88 | 1.53 | 1.78 |      |
| rc_AI011087_at   | O | C | 5 |   | 44.5   | 2.273   | OC |          | 9.69E-02 | 3.02E-01 | 2.09E-05 |      | 1.45 | 1.35 | 2.47 |
| rc_AI011087_at   | O | T | 4 |   | 64.6   | 11.511  | OT | 9.69E-02 |          | 1.40E-02 | 1.24E-03 | 1.45 |      | 1.96 | 1.70 |
| rc_AI011087_at   | Y | C | 4 | 1 | 33.0   | 4.525   | YC | 3.02E-01 | 1.40E-02 |          | 3.32E-06 | 1.35 | 1.96 |      | 3.32 |
| rc_AI011087_at   | Y | T | 5 |   | 109.7  | 10.496  | YT | 2.09E-05 | 1.24E-03 | 3.32E-06 |          | 2.47 | 1.70 | 3.32 |      |
| M69246_at        | O | C | 5 |   | 277.9  | 25.323  | OC |          | 1.39E-03 | 2.31E-06 | 2.97E-02 |      | 2.75 | 2.18 | 1.65 |
| M69246_at        | O | T | 4 | 1 | 101.1  | 13.822  | OT | 1.39E-03 |          | 7.11E-09 | 1.60E-01 | 2.75 |      | 5.99 | 1.67 |
| M69246_at        | Y | C | 5 |   | 605.5  | 44.311  | YC | 2.31E-06 | 7.11E-09 |          | 5.30E-08 | 2.18 | 5.99 |      | 3.59 |
| M69246_at        | Y | T | 5 |   | 168.5  | 37.457  | YT | 2.97E-02 | 1.60E-01 | 5.30E-08 |          | 1.65 | 1.67 | 3.59 |      |
| rc_AA848948_at   | O | C | 5 |   | 405.9  | 19.923  | OC |          | 2.11E-04 | 3.44E-02 | 8.96E-07 |      | 1.72 | 1.48 | 2.11 |
| rc_AA848948_at   | O | T | 4 |   | 697.3  | 80.605  | OT | 2.11E-04 |          | 3.96E-06 | 1.76E-02 | 1.72 |      | 2.54 | 1.23 |
| rc_AA848948_at   | Y | C | 5 |   | 274.1  | 23.419  | YC | 3.44E-02 | 3.96E-06 |          | 3.38E-08 | 1.48 | 2.54 |      | 3.13 |
| rc_AA848948_at   | Y | T | 5 |   | 857.4  | 34.181  | YT | 8.96E-07 | 1.76E-02 | 3.38E-08 |          | 2.11 | 1.23 | 3.13 |      |
| rc_AA849312_at   | O | C | 5 |   | 896.7  | 57.144  | OC |          | 9.80E-02 | 8.48E-01 | 9.62E-08 |      | 1.18 | 1.02 | 1.91 |
| rc_AA849312_at   | O | T | 4 |   | 1057.9 | 58.359  | OT | 9.80E-02 |          | 1.35E-01 | 3.06E-06 | 1.18 |      | 1.16 | 1.62 |
| rc_AA849312_at   | Y | C | 5 |   | 913.4  | 60.884  | YC | 8.48E-01 | 1.35E-01 |          | 1.26E-07 | 1.02 | 1.16 |      | 1.88 |
| rc_AA849312_at   | Y | T | 5 |   | 1716.1 | 70.018  | YT | 9.62E-08 | 3.06E-06 | 1.26E-07 |          | 1.91 | 1.62 | 1.88 |      |
| rc_AA849609_at   | O | C | 5 |   | 1891.3 | 100.844 | OC |          | 2.07E-02 | 6.13E-03 | 6.95E-05 |      | 1.30 | 1.27 | 1.84 |
| rc_AA849609_at   | O | T | 4 |   | 1456.7 | 148.891 | OT | 2.07E-02 |          | 5.16E-05 | 2.29E-02 | 1.30 |      | 1.65 | 1.41 |
| rc_AA849609_at   | Y | C | 5 |   | 2396.4 | 130.684 | YC | 6.13E-03 | 5.16E-05 |          | 3.40E-07 | 1.27 | 1.65 |      | 2.33 |
| rc_AA849609_at   | Y | T | 5 |   | 1030.5 | 80.943  | YT | 6.95E-05 | 2.29E-02 | 3.40E-07 |          | 1.84 | 1.41 | 2.33 |      |
| rc_AA849754_at   | O | C | 5 |   | 230.3  | 19.984  | OC |          | 9.23E-03 | 2.00E-04 | 4.69E-04 |      | 1.52 | 1.53 | 1.93 |
| rc_AA849754_at   | O | T | 4 |   | 151.3  | 13.063  | OT | 9.23E-03 |          | 1.64E-06 | 2.46E-01 | 1.52 |      | 2.33 | 1.27 |
| rc_AA849754_at   | Y | C | 5 |   | 352.0  | 24.020  | YC | 2.00E-04 | 1.64E-06 |          | 1.24E-07 | 1.53 | 2.33 |      | 2.95 |
| rc_AA849754_at   | Y | T | 5 |   | 119.3  | 9.336   | YT | 4.69E-04 | 2.46E-01 | 1.24E-07 |          | 1.93 | 1.27 | 2.95 |      |
| rc_AA850130_at   | O | C | 5 |   | 4049.9 | 97.422  | OC |          | 1.24E-02 | 1.07E-01 | 3.80E-05 |      | 1.29 | 1.13 | 1.74 |
| rc_AA850130_at   | O | T | 4 |   | 3145.9 | 243.947 | OT | 1.24E-02 |          | 4.62E-04 | 2.06E-02 | 1.29 |      | 1.45 | 1.35 |
| rc_AA850130_at   | Y | C | 5 |   | 4564.6 | 273.783 | YC | 1.07E-01 | 4.62E-04 |          | 1.98E-06 | 1.13 | 1.45 |      | 1.97 |
| rc_AA850130_at   | Y | T | 5 |   | 2322.1 | 220.917 | YT | 3.80E-05 | 2.06E-02 | 1.98E-06 |          | 1.74 | 1.35 | 1.97 |      |
| rc_AA850130_g_at | O | C | 5 |   | 2343.0 | 29.797  | OC |          | 6.32E-02 | 6.31E-03 | 6.23E-05 |      | 1.14 | 1.19 | 1.47 |
| rc_AA850130_g_at | O | T | 4 |   | 2050.9 | 109.397 | OT | 6.32E-02 |          | 1.59E-04 | 6.36E-03 | 1.14 |      | 1.35 | 1.29 |
| rc_AA850130_g_at | Y | C | 5 |   | 2778.4 | 147.557 | YC | 6.31E-03 | 1.59E-04 |          | 3.19E-07 | 1.19 | 1.35 |      | 1.75 |
| rc_AA850130_g_at | Y | T | 5 |   | 1589.7 | 73.991  | YT | 6.23E-05 | 6.36E-03 | 3.19E-07 |          | 1.47 | 1.29 | 1.75 |      |
| rc_AA851785_at   | O | C | 5 |   | 933.4  | 26.841  | OC |          | 1.07E-01 | 7.81E-01 | 4.48E-06 |      | 1.10 | 1.02 | 1.36 |
| rc_AA851785_at   | O | T | 4 |   | 1022.2 | 31.302  | OT | 1.07E-01 |          | 6.63E-02 | 2.08E-04 | 1.10 |      | 1.11 | 1.25 |
| rc_AA851785_at   | Y | C | 5 |   | 919.5  | 34.895  | YC | 7.81E-01 | 6.63E-02 |          | 2.80E-06 | 1.02 | 1.11 |      | 1.39 |
| rc_AA851785_at   | Y | T | 5 |   | 1274.0 | 44.142  | YT | 4.48E-06 | 2.08E-04 | 2.80E-06 |          | 1.36 | 1.25 | 1.39 |      |
| rc_AA851926_at   | O | C | 5 |   | 1025.4 | 52.442  | OC |          | 4.18E-03 | 2.37E-02 | 2.67E-05 |      | 1.32 | 1.29 | 1.52 |
| rc_AA851926_at   | O | T | 4 |   | 1348.7 | 77.797  | OT | 4.18E-03 |          | 3.86E-05 | 4.10E-02 | 1.32 |      | 1.69 | 1.16 |
| rc_AA851926_at   | Y | C | 5 |   | 797.9  | 77.701  | YC | 2.37E-02 | 3.86E-05 |          | 4.25E-07 | 1.29 | 1.69 |      | 1.96 |
| rc_AA851926_at   | Y | T | 5 |   | 1563.0 | 53.781  | YT | 2.67E-05 | 4.10E-02 | 4.25E-07 |          | 1.52 | 1.16 | 1.96 |      |

|                  |   |   |   |  |        |         |    |          |          |          |          |      |      |      |      |
|------------------|---|---|---|--|--------|---------|----|----------|----------|----------|----------|------|------|------|------|
| rc_AA900580_g_at | O | C | 5 |  | 2845.2 | 93.278  | OC |          | 4.35E-03 | 1.48E-01 | 8.18E-07 |      | 1.21 | 1.07 | 1.64 |
| rc_AA900580_g_at | O | T | 4 |  | 2355.3 | 67.259  | OT | 4.35E-03 |          | 2.37E-04 | 7.43E-04 | 1.21 |      | 1.30 | 1.35 |
| rc_AA900580_g_at | Y | C | 5 |  | 3055.3 | 105.566 | YC | 1.48E-01 | 2.37E-04 |          | 9.01E-08 | 1.07 | 1.30 |      | 1.76 |
| rc_AA900580_g_at | Y | T | 5 |  | 1739.1 | 113.954 | YT | 8.18E-07 | 7.43E-04 | 9.01E-08 |          | 1.64 | 1.35 | 1.76 |      |
| rc_AA901343_at   | O | C | 5 |  | 395.8  | 17.922  | OC |          | 2.21E-02 | 4.71E-01 | 4.57E-06 |      | 1.23 | 1.07 | 1.60 |
| rc_AA901343_at   | O | T | 4 |  | 488.8  | 7.718   | OT | 2.21E-02 |          | 5.37E-03 | 1.14E-03 | 1.23 |      | 1.32 | 1.30 |
| rc_AA901343_at   | Y | C | 5 |  | 370.4  | 38.472  | YC | 4.71E-01 | 5.37E-03 |          | 1.37E-06 | 1.07 | 1.32 |      | 1.71 |
| rc_AA901343_at   | Y | T | 5 |  | 634.9  | 19.346  | YT | 4.57E-06 | 1.14E-03 | 1.37E-06 |          | 1.60 | 1.30 | 1.71 |      |
| rc_AA924075_s_at | O | C | 5 |  | 337.3  | 25.963  | OC |          | 2.40E-02 | 4.09E-01 | 1.87E-07 |      | 1.53 | 1.17 | 2.80 |
| rc_AA924075_s_at | O | T | 4 |  | 516.1  | 32.367  | OT | 2.40E-02 |          | 1.08E-01 | 2.40E-05 | 1.53 |      | 1.31 | 1.83 |
| rc_AA924075_s_at | Y | C | 5 |  | 394.4  | 41.176  | YC | 4.09E-01 | 1.08E-01 |          | 6.49E-07 | 1.17 | 1.31 |      | 2.39 |
| rc_AA924075_s_at | Y | T | 5 |  | 943.7  | 73.824  | YT | 1.87E-07 | 2.40E-05 | 6.49E-07 |          | 2.80 | 1.83 | 2.39 |      |
| rc_AA924417_f_at | O | C | 5 |  | 4393.5 | 100.628 | OC |          | 5.82E-07 | 5.04E-01 | 1.27E-09 |      | 1.65 | 1.03 | 2.44 |
| rc_AA924417_f_at | O | T | 4 |  | 2662.9 | 170.031 | OT | 5.82E-07 |          | 2.25E-07 | 9.34E-04 | 1.65 |      | 1.70 | 1.48 |
| rc_AA924417_f_at | Y | C | 5 |  | 4528.8 | 94.058  | YC | 5.04E-01 | 2.25E-07 |          | 6.27E-10 | 1.03 | 1.70 |      | 2.51 |
| rc_AA924417_f_at | Y | T | 5 |  | 1802.2 | 192.091 | YT | 1.27E-09 | 9.34E-04 | 6.27E-10 |          | 2.44 | 1.48 | 2.51 |      |
| rc_AA924532_at   | O | C | 5 |  | 729.7  | 24.726  | OC |          | 1.54E-01 | 1.38E-04 | 1.57E-03 |      | 1.11 | 1.58 | 1.28 |
| rc_AA924532_at   | O | T | 4 |  | 813.4  | 40.226  | OT | 1.54E-01 |          | 1.47E-05 | 5.01E-02 | 1.11 |      | 1.76 | 1.15 |
| rc_AA924532_at   | Y | C | 5 |  | 462.7  | 16.407  | YC | 1.38E-04 | 1.47E-05 |          | 2.20E-07 | 1.58 | 1.76 |      | 2.01 |
| rc_AA924532_at   | Y | T | 5 |  | 932.4  | 57.836  | YT | 1.57E-03 | 5.01E-02 | 2.20E-07 |          | 1.28 | 1.15 | 2.01 |      |
| rc_AA924630_g_at | O | C | 5 |  | 353.7  | 13.140  | OC |          | 1.43E-02 | 5.10E-01 | 5.11E-08 |      | 1.31 | 1.07 | 2.06 |
| rc_AA924630_g_at | O | T | 4 |  | 464.2  | 25.926  | OT | 1.43E-02 |          | 4.99E-02 | 7.84E-06 | 1.31 |      | 1.22 | 1.57 |
| rc_AA924630_g_at | Y | C | 5 |  | 379.1  | 23.506  | YC | 5.10E-01 | 4.99E-02 |          | 1.27E-07 | 1.07 | 1.22 |      | 1.92 |
| rc_AA924630_g_at | Y | T | 5 |  | 729.3  | 39.054  | YT | 5.11E-08 | 7.84E-06 | 1.27E-07 |          | 2.06 | 1.57 | 1.92 |      |
| rc_AA924964_g_at | O | C | 5 |  | 662.7  | 8.583   | OC |          | 9.29E-01 | 1.18E-02 | 6.61E-04 |      | 1.00 | 1.13 | 1.17 |
| rc_AA924964_g_at | O | T | 4 |  | 665.2  | 20.490  | OT | 9.29E-01 |          | 1.37E-02 | 1.30E-03 | 1.00 |      | 1.13 | 1.16 |
| rc_AA924964_g_at | Y | C | 5 |  | 588.1  | 23.017  | YC | 1.18E-02 | 1.37E-02 |          | 3.38E-06 | 1.13 | 1.13 |      | 1.32 |
| rc_AA924964_g_at | Y | T | 5 |  | 774.0  | 20.368  | YT | 6.61E-04 | 1.30E-03 | 3.38E-06 |          | 1.17 | 1.16 | 1.32 |      |
| rc_AA924985_at   | O | C | 5 |  | 2702.1 | 65.462  | OC |          | 1.62E-09 | 5.57E-03 | 5.31E-13 |      | 2.16 | 1.15 | 9.06 |
| rc_AA924985_at   | O | T | 4 |  | 1248.6 | 88.365  | OT | 1.62E-09 |          | 6.18E-08 | 4.52E-07 | 2.16 |      | 1.89 | 4.19 |
| rc_AA924985_at   | Y | C | 5 |  | 2358.3 | 102.896 | YC | 5.57E-03 | 6.18E-08 |          | 5.00E-12 | 1.15 | 1.89 |      | 7.91 |
| rc_AA924985_at   | Y | T | 5 |  | 298.2  | 40.555  | YT | 5.31E-13 | 4.52E-07 | 5.00E-12 |          | 9.06 | 4.19 | 7.91 |      |
| rc_AA925045_g_at | O | C | 5 |  | 425.1  | 27.463  | OC |          | 1.06E-01 | 2.85E-02 | 5.33E-05 |      | 1.17 | 1.28 | 1.50 |
| rc_AA925045_g_at | O | T | 4 |  | 495.2  | 44.974  | OT | 1.06E-01 |          | 1.14E-03 | 3.02E-03 | 1.17 |      | 1.49 | 1.29 |
| rc_AA925045_g_at | Y | C | 5 |  | 332.0  | 22.719  | YC | 2.85E-02 | 1.14E-03 |          | 8.66E-07 | 1.28 | 1.49 |      | 1.92 |
| rc_AA925045_g_at | Y | T | 5 |  | 639.0  | 16.732  | YT | 5.33E-05 | 3.02E-03 | 8.66E-07 |          | 1.50 | 1.29 | 1.92 |      |
| rc_AA925057_at   | O | C | 5 |  | 1311.6 | 70.432  | OC |          | 3.72E-02 | 1.81E-05 | 1.21E-01 |      | 1.17 | 1.38 | 1.11 |
| rc_AA925057_at   | O | T | 4 |  | 1117.7 | 59.061  | OT | 3.72E-02 |          | 7.41E-07 | 4.72E-01 | 1.17 |      | 1.61 | 1.06 |
| rc_AA925057_at   | Y | C | 5 |  | 1804.7 | 37.427  | YC | 1.81E-05 | 7.41E-07 |          | 1.16E-06 | 1.38 | 1.61 |      | 1.53 |
| rc_AA925057_at   | Y | T | 5 |  | 1180.3 | 59.503  | YT | 1.21E-01 | 4.72E-01 | 1.16E-06 |          | 1.11 | 1.06 | 1.53 |      |
| rc_AA925814_s_at | O | C | 5 |  | 6510.7 | 61.826  | OC |          | 9.87E-04 | 9.97E-04 | 1.13E-07 |      | 1.12 | 1.10 | 1.31 |
| rc_AA925814_s_at | O | T | 4 |  | 5797.0 | 139.721 | OT | 9.87E-04 |          | 9.73E-07 | 2.43E-04 | 1.12 |      | 1.24 | 1.17 |
| rc_AA925814_s_at | Y | C | 5 |  | 7182.7 | 97.265  | YC | 9.97E-04 | 9.73E-07 |          | 8.76E-10 | 1.10 | 1.24 |      | 1.45 |
| rc_AA925814_s_at | Y | T | 5 |  | 4960.7 | 161.279 | YT | 1.13E-07 | 2.43E-04 | 8.76E-10 |          | 1.31 | 1.17 | 1.45 |      |

|                  |   |   |   |  |        |         |    |          |          |          |          |      |      |      |      |
|------------------|---|---|---|--|--------|---------|----|----------|----------|----------|----------|------|------|------|------|
| rc_AA943110_at   | O | C | 5 |  | 113.0  | 14.161  | OC |          | 5.12E-04 | 4.34E-01 | 7.28E-09 |      | 1.97 | 1.17 | 3.40 |
| rc_AA943110_at   | O | T | 4 |  | 222.8  | 18.878  | OT | 5.12E-04 |          | 2.38E-03 | 1.03E-05 | 1.97 |      | 1.69 | 1.73 |
| rc_AA943110_at   | Y | C | 5 |  | 131.9  | 15.965  | YC | 4.34E-01 | 2.38E-03 |          | 1.92E-08 | 1.17 | 1.69 |      | 2.92 |
| rc_AA943110_at   | Y | T | 5 |  | 384.4  | 19.141  | YT | 7.28E-09 | 1.03E-05 | 1.92E-08 |          | 3.40 | 1.73 | 2.92 |      |
| rc_AA944212_at   | O | C | 5 |  | 413.4  | 19.783  | OC |          | 1.00E-03 | 9.69E-03 | 2.02E-05 |      | 1.43 | 1.42 | 1.61 |
| rc_AA944212_at   | O | T | 4 |  | 593.1  | 44.035  | OT | 1.00E-03 |          | 5.38E-06 | 1.13E-01 | 1.43 |      | 2.04 | 1.13 |
| rc_AA944212_at   | Y | C | 5 |  | 290.2  | 27.824  | YC | 9.69E-03 | 5.38E-06 |          | 1.79E-07 | 1.42 | 2.04 |      | 2.30 |
| rc_AA944212_at   | Y | T | 5 |  | 667.4  | 30.281  | YT | 2.02E-05 | 1.13E-01 | 1.79E-07 |          | 1.61 | 1.13 | 2.30 |      |
| rc_AA944335_at   | O | C | 5 |  | 775.2  | 59.651  | OC |          | 1.20E-01 | 7.25E-01 | 1.10E-06 |      | 1.25 | 1.05 | 2.14 |
| rc_AA944335_at   | O | T | 4 |  | 971.5  | 103.901 | OT | 1.20E-01 |          | 6.57E-02 | 3.86E-05 | 1.25 |      | 1.32 | 1.70 |
| rc_AA944335_at   | Y | C | 5 |  | 735.0  | 46.397  | YC | 7.25E-01 | 6.57E-02 |          | 6.33E-07 | 1.05 | 1.32 |      | 2.25 |
| rc_AA944335_at   | Y | T | 5 |  | 1656.0 | 107.035 | YT | 1.10E-06 | 3.86E-05 | 6.33E-07 |          | 2.14 | 1.70 | 2.25 |      |
| rc_AA944393_at   | O | C | 5 |  | 6793.7 | 231.179 | OC |          | 1.50E-02 | 3.21E-02 | 4.76E-06 |      | 1.16 | 1.11 | 1.50 |
| rc_AA944393_at   | O | T | 4 |  | 5846.0 | 97.187  | OT | 1.50E-02 |          | 1.67E-04 | 1.76E-03 | 1.16 |      | 1.29 | 1.29 |
| rc_AA944393_at   | Y | C | 5 |  | 7562.7 | 223.017 | YC | 3.21E-02 | 1.67E-04 |          | 1.29E-07 | 1.11 | 1.29 |      | 1.67 |
| rc_AA944393_at   | Y | T | 5 |  | 4535.8 | 299.681 | YT | 4.76E-06 | 1.76E-03 | 1.29E-07 |          | 1.50 | 1.29 | 1.67 |      |
| rc_AA944741_at   | O | C | 5 |  | 681.1  | 24.147  | OC |          | 3.56E-04 | 9.54E-01 | 1.40E-08 |      | 1.36 | 1.00 | 1.81 |
| rc_AA944741_at   | O | T | 4 |  | 925.4  | 56.748  | OT | 3.56E-04 |          | 3.98E-04 | 3.59E-05 | 1.36 |      | 1.35 | 1.33 |
| rc_AA944741_at   | Y | C | 5 |  | 684.0  | 23.352  | YC | 9.54E-01 | 3.98E-04 |          | 1.51E-08 | 1.00 | 1.35 |      | 1.80 |
| rc_AA944741_at   | Y | T | 5 |  | 1233.6 | 40.847  | YT | 1.40E-08 | 3.59E-05 | 1.51E-08 |          | 1.81 | 1.33 | 1.80 |      |
| rc_AA945149_at   | O | C | 5 |  | 663.4  | 98.238  | OC |          | 1.27E-03 | 1.79E-01 | 5.72E-08 |      | 2.86 | 2.68 | 5.40 |
| rc_AA945149_at   | O | T | 4 |  | 1900.5 | 347.908 | OT | 1.27E-03 |          | 9.15E-05 | 7.71E-05 | 2.86 |      | 7.69 | 1.88 |
| rc_AA945149_at   | Y | C | 5 |  | 247.2  | 13.514  | YC | 1.79E-01 | 9.15E-05 |          | 9.68E-09 | 2.68 | 7.69 |      | ###  |
| rc_AA945149_at   | Y | T | 5 |  | 3582.1 | 283.908 | YT | 5.72E-08 | 7.71E-05 | 9.68E-09 |          | 5.40 | 1.88 | ###  |      |
| rc_AA946029_at   | O | C | 5 |  | 289.7  | 17.971  | OC |          | 7.49E-06 | 1.27E-01 | 6.15E-09 |      | 1.81 | 1.23 | 2.34 |
| rc_AA946029_at   | O | T | 4 |  | 523.8  | 42.895  | OT | 7.49E-06 |          | 6.41E-07 | 5.64E-04 | 1.81 |      | 2.22 | 1.29 |
| rc_AA946029_at   | Y | C | 5 |  | 236.2  | 19.549  | YC | 1.27E-01 | 6.41E-07 |          | 1.04E-09 | 1.23 | 2.22 |      | 2.86 |
| rc_AA946029_at   | Y | T | 5 |  | 676.7  | 15.622  | YT | 6.15E-09 | 5.64E-04 | 1.04E-09 |          | 2.34 | 1.29 | 2.86 |      |
| rc_AA955741_at   | O | C | 5 |  | 593.1  | 13.605  | OC |          | 3.64E-03 | 1.16E-03 | 5.75E-04 |      | 1.25 | 1.22 | 1.31 |
| rc_AA955741_at   | O | T | 4 |  | 475.9  | 11.938  | OT | 3.64E-03 |          | 3.01E-06 | 5.21E-01 | 1.25 |      | 1.52 | 1.05 |
| rc_AA955741_at   | Y | C | 5 |  | 721.6  | 30.621  | YC | 1.16E-03 | 3.01E-06 |          | 5.07E-07 | 1.22 | 1.52 |      | 1.59 |
| rc_AA955741_at   | Y | T | 5 |  | 453.5  | 26.930  | YT | 5.75E-04 | 5.21E-01 | 5.07E-07 |          | 1.31 | 1.05 | 1.59 |      |
| rc_AA956871_at   | O | C | 5 |  | 401.3  | 20.139  | OC |          | 9.80E-03 | 3.01E-02 | 2.53E-09 |      | 1.21 | 1.19 | 1.84 |
| rc_AA956871_at   | O | T | 4 |  | 486.5  | 20.833  | OT | 9.80E-03 |          | 1.05E-04 | 2.59E-07 | 1.21 |      | 1.45 | 1.52 |
| rc_AA956871_at   | Y | C | 5 |  | 336.3  | 14.579  | YC | 3.01E-02 | 1.05E-04 |          | 2.19E-10 | 1.19 | 1.45 |      | 2.20 |
| rc_AA956871_at   | Y | T | 5 |  | 740.0  | 22.433  | YT | 2.53E-09 | 2.59E-07 | 2.19E-10 |          | 1.84 | 1.52 | 2.20 |      |
| rc_AA957244_i_at | O | C | 5 |  | 244.5  | 16.951  | OC |          | 1.01E-03 | 1.37E-02 | 1.51E-05 |      | 1.60 | 1.24 | 2.19 |
| rc_AA957244_i_at | O | T | 4 |  | 153.0  | 17.956  | OT | 1.01E-03 |          | 7.13E-06 | 8.57E-02 | 1.60 |      | 1.99 | 1.37 |
| rc_AA957244_i_at | Y | C | 5 |  | 303.7  | 15.276  | YC | 1.37E-02 | 7.13E-06 |          | 1.81E-07 | 1.24 | 1.99 |      | 2.72 |
| rc_AA957244_i_at | Y | T | 5 |  | 111.6  | 11.403  | YT | 1.51E-05 | 8.57E-02 | 1.81E-07 |          | 2.19 | 1.37 | 2.72 |      |
| rc_AA957501_at   | O | C | 5 |  | 341.9  | 17.492  | OC |          | 5.37E-01 | 9.01E-05 | 7.22E-02 |      | 1.05 | 1.39 | 1.16 |
| rc_AA957501_at   | O | T | 4 |  | 325.2  | 18.017  | OT | 5.37E-01 |          | 4.85E-05 | 2.52E-01 | 1.05 |      | 1.46 | 1.11 |
| rc_AA957501_at   | Y | C | 5 |  | 473.8  | 24.177  | YC | 9.01E-05 | 4.85E-05 |          | 2.94E-06 | 1.39 | 1.46 |      | 1.61 |
| rc_AA957501_at   | Y | T | 5 |  | 293.7  | 8.919   | YT | 7.22E-02 | 2.52E-01 | 2.94E-06 |          | 1.16 | 1.11 | 1.61 |      |

|                |   |   |   |  |        |         |    |          |          |          |          |      |      |      |      |
|----------------|---|---|---|--|--------|---------|----|----------|----------|----------|----------|------|------|------|------|
| rc_AA957596_at | O | C | 5 |  | 280.0  | 35.529  | OC |          | 4.66E-01 | 1.26E-07 | 6.76E-02 |      | 1.17 | 2.97 | 1.42 |
| rc_AA957596_at | O | T | 4 |  | 326.9  | 47.491  | OT | 4.66E-01 |          | 8.17E-07 | 2.85E-01 | 1.17 |      | 2.54 | 1.21 |
| rc_AA957596_at | Y | C | 5 |  | 830.7  | 55.088  | YC | 1.26E-07 | 8.17E-07 |          | 2.43E-06 | 2.97 | 2.54 |      | 2.10 |
| rc_AA957596_at | Y | T | 5 |  | 396.4  | 30.046  | YT | 6.76E-02 | 2.85E-01 | 2.43E-06 |          | 1.42 | 1.21 | 2.10 |      |
| rc_AA957653_at | O | C | 5 |  | 2663.7 | 201.900 | OC |          | 2.34E-09 | 5.12E-08 | 1.71E-10 |      | 5.67 | 2.61 | ###  |
| rc_AA957653_at | O | T | 4 |  | 470.2  | 54.022  | OT | 2.34E-09 |          | 6.76E-03 | 1.06E-01 | 5.67 |      | 2.17 | 2.78 |
| rc_AA957653_at | Y | C | 5 |  | 1018.8 | 90.403  | YC | 5.12E-08 | 6.76E-03 |          | 1.18E-04 | 2.61 | 2.17 |      | 6.02 |
| rc_AA957653_at | Y | T | 5 |  | 169.4  | 15.052  | YT | 1.71E-10 | 1.06E-01 | 1.18E-04 |          | ###  | 2.78 | 6.02 |      |
| rc_AA957835_at | O | C | 5 |  | 107.5  | 7.292   | OC |          | 2.67E-03 | 4.90E-07 | 3.32E-01 |      | 1.98 | 2.09 | 1.15 |
| rc_AA957835_at | O | T | 4 |  | 54.2   | 6.188   | OT | 2.67E-03 |          | 7.86E-09 | 1.83E-02 | 1.98 |      | 4.15 | 1.73 |
| rc_AA957835_at | Y | C | 5 |  | 224.7  | 14.510  | YC | 4.90E-07 | 7.86E-09 |          | 1.16E-07 | 2.09 | 4.15 |      | 2.40 |
| rc_AA957835_at | Y | T | 5 |  | 93.5   | 8.982   | YT | 3.32E-01 | 1.83E-02 | 1.16E-07 |          | 1.15 | 1.73 | 2.40 |      |
| rc_AA963716_at | O | C | 5 |  | 2490.4 | 65.965  | OC |          | 2.64E-09 | 2.28E-03 | 5.57E-09 |      | 2.45 | 1.20 | 2.12 |
| rc_AA963716_at | O | T | 4 |  | 1018.0 | 169.098 | OT | 2.64E-09 |          | 2.02E-07 | 2.02E-01 | 2.45 |      | 2.04 | 1.16 |
| rc_AA963716_at | Y | C | 5 |  | 2081.0 | 40.748  | YC | 2.28E-03 | 2.02E-07 |          | 7.26E-07 | 1.20 | 2.04 |      | 1.77 |
| rc_AA963716_at | Y | T | 5 |  | 1175.8 | 13.651  | YT | 5.57E-09 | 2.02E-01 | 7.26E-07 |          | 2.12 | 1.16 | 1.77 |      |
| rc_AA963797_at | O | C | 5 |  | 219.5  | 11.342  | OC |          | 4.43E-05 | 3.59E-01 | 2.85E-02 |      | 1.33 | 1.05 | 1.15 |
| rc_AA963797_at | O | T | 4 |  | 292.1  | 7.552   | OT | 4.43E-05 |          | 2.43E-04 | 9.20E-07 | 1.33 |      | 1.27 | 1.54 |
| rc_AA963797_at | Y | C | 5 |  | 230.9  | 8.126   | YC | 3.59E-01 | 2.43E-04 |          | 4.21E-03 | 1.05 | 1.27 |      | 1.21 |
| rc_AA963797_at | Y | T | 5 |  | 190.2  | 6.677   | YT | 2.85E-02 | 9.20E-07 | 4.21E-03 |          | 1.15 | 1.54 | 1.21 |      |
| rc_AA964477_at | O | C | 5 |  | 345.9  | 8.714   | OC |          | 1.49E-01 | 1.70E-01 | 1.02E-05 |      | 1.15 | 1.15 | 1.60 |
| rc_AA964477_at | O | T | 4 |  | 397.6  | 18.285  | OT | 1.49E-01 |          | 1.14E-02 | 3.49E-04 | 1.15 |      | 1.33 | 1.39 |
| rc_AA964477_at | Y | C | 5 |  | 299.8  | 28.497  | YC | 1.70E-01 | 1.14E-02 |          | 9.54E-07 | 1.15 | 1.33 |      | 1.85 |
| rc_AA964477_at | Y | T | 5 |  | 553.5  | 28.791  | YT | 1.02E-05 | 3.49E-04 | 9.54E-07 |          | 1.60 | 1.39 | 1.85 |      |
| rc_AA964777_at | O | C | 5 |  | 375.3  | 20.001  | OC |          | 1.10E-01 | 9.89E-06 | 9.34E-01 |      | 1.15 | 1.46 | 1.01 |
| rc_AA964777_at | O | T | 4 |  | 327.7  | 14.328  | OT | 1.10E-01 |          | 1.11E-06 | 1.27E-01 | 1.15 |      | 1.67 | 1.14 |
| rc_AA964777_at | Y | C | 5 |  | 547.5  | 17.479  | YC | 9.89E-06 | 1.11E-06 |          | 8.54E-06 | 1.46 | 1.67 |      | 1.47 |
| rc_AA964777_at | Y | T | 5 |  | 373.1  | 21.997  | YT | 9.34E-01 | 1.27E-01 | 8.54E-06 |          | 1.01 | 1.14 | 1.47 |      |
| rc_AA997765_at | O | C | 5 |  | 264.7  | 19.272  | OC |          | 4.42E-01 | 2.98E-06 | 8.23E-01 |      | 1.20 | 2.43 | 1.05 |
| rc_AA997765_at | O | T | 4 |  | 220.7  | 10.598  | OT | 4.42E-01 |          | 1.62E-06 | 5.74E-01 | 1.20 |      | 2.92 | 1.15 |
| rc_AA997765_at | Y | C | 5 |  | 644.4  | 66.381  | YC | 2.98E-06 | 1.62E-06 |          | 2.06E-06 | 2.43 | 2.92 |      | 2.55 |
| rc_AA997765_at | Y | T | 5 |  | 252.8  | 18.455  | YT | 8.23E-01 | 5.74E-01 | 2.06E-06 |          | 1.05 | 1.15 | 2.55 |      |
| rc_AA998128_at | O | C | 5 |  | 222.3  | 7.871   | OC |          | 1.07E-02 | 5.45E-08 | 5.88E-05 |      | 1.25 | 1.65 | 1.57 |
| rc_AA998128_at | O | T | 4 |  | 177.1  | 13.522  | OT | 1.07E-02 |          | 3.16E-09 | 3.67E-02 | 1.25 |      | 2.08 | 1.25 |
| rc_AA998128_at | Y | C | 5 |  | 367.5  | 13.149  | YC | 5.45E-08 | 3.16E-09 |          | 1.27E-10 | 1.65 | 2.08 |      | 2.60 |
| rc_AA998128_at | Y | T | 5 |  | 141.6  | 7.505   | YT | 5.88E-05 | 3.67E-02 | 1.27E-10 |          | 1.57 | 1.25 | 2.60 |      |
| rc_AA998174_at | O | C | 5 |  | 576.3  | 20.543  | OC |          | 1.49E-08 | 9.36E-04 | 7.94E-01 |      | 2.02 | 1.57 | 1.02 |
| rc_AA998174_at | O | T | 4 |  | 1165.6 | 80.764  | OT | 1.49E-08 |          | 2.30E-10 | 1.10E-08 | 2.02 |      | 3.17 | 2.07 |
| rc_AA998174_at | Y | C | 5 |  | 368.0  | 18.820  | YC | 9.36E-04 | 2.30E-10 |          | 1.61E-03 | 1.57 | 3.17 |      | 1.53 |
| rc_AA998174_at | Y | T | 5 |  | 562.9  | 11.647  | YT | 7.94E-01 | 1.10E-08 | 1.61E-03 |          | 1.02 | 2.07 | 1.53 |      |
| rc_AA999183_at | O | C | 5 |  | 167.2  | 5.822   | OC |          | 4.52E-05 | 1.39E-01 | 2.03E-01 |      | 1.25 | 1.07 | 1.06 |
| rc_AA999183_at | O | T | 4 |  | 208.5  | 4.983   | OT | 4.52E-05 |          | 3.42E-06 | 4.92E-06 | 1.25 |      | 1.33 | 1.32 |
| rc_AA999183_at | Y | C | 5 |  | 156.4  | 3.789   | YC | 1.39E-01 | 3.42E-06 |          | 8.19E-01 | 1.07 | 1.33 |      | 1.01 |
| rc_AA999183_at | Y | T | 5 |  | 158.0  | 5.065   | YT | 2.03E-01 | 4.92E-06 | 8.19E-01 |          | 1.06 | 1.32 | 1.01 |      |

|                  |   |   |   |  |        |         |    |          |          |          |          |      |      |      |      |
|------------------|---|---|---|--|--------|---------|----|----------|----------|----------|----------|------|------|------|------|
| rc_AI008066_at   | O | C | 5 |  | 5981.1 | 125.236 | OC |          | 2.33E-04 | 2.40E-02 | 2.98E-07 |      | 1.27 | 1.11 | 1.58 |
| rc_AI008066_at   | O | T | 4 |  | 4692.7 | 183.573 | OT | 2.33E-04 |          | 3.24E-06 | 3.88E-03 | 1.27 |      | 1.41 | 1.24 |
| rc_AI008066_at   | Y | C | 5 |  | 6616.1 | 164.463 | YC | 2.40E-02 | 3.24E-06 |          | 1.08E-08 | 1.11 | 1.41 |      | 1.75 |
| rc_AI008066_at   | Y | T | 5 |  | 3777.7 | 238.906 | YT | 2.98E-07 | 3.88E-03 | 1.08E-08 |          | 1.58 | 1.24 | 1.75 |      |
| rc_AI008504_at   | O | C | 5 |  | 259.8  | 9.279   | OC |          | 1.60E-03 | 1.40E-01 | 4.33E-06 |      | 1.20 | 1.08 | 1.53 |
| rc_AI008504_at   | O | T | 4 |  | 312.4  | 7.616   | OT | 1.60E-03 |          | 3.15E-02 | 2.84E-08 | 1.20 |      | 1.12 | 1.84 |
| rc_AI008504_at   | Y | C | 5 |  | 279.9  | 6.147   | YC | 1.40E-01 | 3.15E-02 |          | 3.75E-07 | 1.08 | 1.12 |      | 1.65 |
| rc_AI008504_at   | Y | T | 5 |  | 169.7  | 12.368  | YT | 4.33E-06 | 2.84E-08 | 3.75E-07 |          | 1.53 | 1.84 | 1.65 |      |
| rc_AI009131_at   | O | C | 5 |  | 614.4  | 23.273  | OC |          | 4.10E-01 | 3.80E-07 | 7.42E-01 |      | 1.08 | 1.67 | 1.03 |
| rc_AI009131_at   | O | T | 4 |  | 570.9  | 44.618  | OT | 4.10E-01 |          | 2.25E-07 | 6.03E-01 | 1.08 |      | 1.80 | 1.05 |
| rc_AI009131_at   | Y | C | 5 |  | 1027.5 | 47.917  | YC | 3.80E-07 | 2.25E-07 |          | 2.33E-07 | 1.67 | 1.80 |      | 1.72 |
| rc_AI009131_at   | Y | T | 5 |  | 598.2  | 18.762  | YT | 7.42E-01 | 6.03E-01 | 2.33E-07 |          | 1.03 | 1.05 | 1.72 |      |
| rc_AI009197_at   | O | C | 5 |  | 548.7  | 31.673  | OC |          | 6.26E-04 | 1.57E-06 | 1.68E-04 |      | 1.50 | 1.84 | 1.55 |
| rc_AI009197_at   | O | T | 4 |  | 825.7  | 28.482  | OT | 6.26E-04 |          | 1.15E-02 | 7.09E-01 | 1.50 |      | 1.22 | 1.03 |
| rc_AI009197_at   | Y | C | 5 |  | 1010.8 | 65.672  | YC | 1.57E-06 | 1.15E-02 |          | 1.83E-02 | 1.84 | 1.22 |      | 1.19 |
| rc_AI009197_at   | Y | T | 5 |  | 850.2  | 33.135  | YT | 1.68E-04 | 7.09E-01 | 1.83E-02 |          | 1.55 | 1.03 | 1.19 |      |
| rc_AI009490_at   | O | C | 5 |  | 8674.3 | 353.320 | OC |          | 7.67E-02 | 1.45E-02 | 4.69E-05 |      | 1.10 | 1.13 | 1.36 |
| rc_AI009490_at   | O | T | 4 |  | 7852.8 | 229.368 | OT | 7.67E-02 |          | 4.18E-04 | 3.82E-03 | 1.10 |      | 1.25 | 1.23 |
| rc_AI009490_at   | Y | C | 5 |  | 9800.3 | 220.680 | YC | 1.45E-02 | 4.18E-04 |          | 4.67E-07 | 1.13 | 1.25 |      | 1.54 |
| rc_AI009490_at   | Y | T | 5 |  | 6375.6 | 325.968 | YT | 4.69E-05 | 3.82E-03 | 4.67E-07 |          | 1.36 | 1.23 | 1.54 |      |
| rc_AI010326_at   | O | C | 5 |  | 222.3  | 3.533   | OC |          | 4.41E-03 | 4.35E-04 | 1.11E-04 |      | 1.55 | 1.45 | 2.07 |
| rc_AI010326_at   | O | T | 4 |  | 143.7  | 8.721   | OT | 4.41E-03 |          | 1.67E-06 | 1.44E-01 | 1.55 |      | 2.24 | 1.34 |
| rc_AI010326_at   | Y | C | 5 |  | 321.6  | 27.856  | YC | 4.35E-04 | 1.67E-06 |          | 7.75E-08 | 1.45 | 2.24 |      | 2.99 |
| rc_AI010326_at   | Y | T | 5 |  | 107.5  | 9.239   | YT | 1.11E-04 | 1.44E-01 | 7.75E-08 |          | 2.07 | 1.34 | 2.99 |      |
| rc_AI010449_at   | O | C | 5 |  | 385.6  | 15.314  | OC |          | 5.86E-03 | 5.75E-06 | 3.38E-02 |      | 1.53 | 1.69 | 1.31 |
| rc_AI010449_at   | O | T | 4 |  | 252.4  | 22.631  | OT | 5.86E-03 |          | 8.05E-08 | 3.30E-01 | 1.53 |      | 2.59 | 1.17 |
| rc_AI010449_at   | Y | C | 5 |  | 652.7  | 38.679  | YC | 5.75E-06 | 8.05E-08 |          | 1.57E-07 | 1.69 | 2.59 |      | 2.22 |
| rc_AI010449_at   | Y | T | 5 |  | 294.2  | 28.885  | YT | 3.38E-02 | 3.30E-01 | 1.57E-07 |          | 1.31 | 1.17 | 2.22 |      |
| rc_AI011457_at   | O | C | 5 |  | 416.0  | 22.701  | OC |          | 2.64E-04 | 2.31E-01 | 5.59E-07 |      | 1.77 | 1.24 | 2.27 |
| rc_AI011457_at   | O | T | 4 |  | 737.2  | 75.069  | OT | 2.64E-04 |          | 2.83E-05 | 7.77E-03 | 1.77 |      | 2.19 | 1.28 |
| rc_AI011457_at   | Y | C | 5 |  | 336.2  | 27.737  | YC | 2.31E-01 | 2.83E-05 |          | 9.35E-08 | 1.24 | 2.19 |      | 2.81 |
| rc_AI011457_at   | Y | T | 5 |  | 945.3  | 54.675  | YT | 5.59E-07 | 7.77E-03 | 9.35E-08 |          | 2.27 | 1.28 | 2.81 |      |
| rc_AI011678_at   | O | C | 5 |  | 510.6  | 11.856  | OC |          | 1.93E-01 | 4.80E-02 | 1.65E-05 |      | 1.09 | 1.15 | 1.61 |
| rc_AI011678_at   | O | T | 4 |  | 555.7  | 16.176  | OT | 1.93E-01 |          | 4.03E-03 | 2.96E-06 | 1.09 |      | 1.25 | 1.76 |
| rc_AI011678_at   | Y | C | 5 |  | 443.3  | 31.990  | YC | 4.80E-02 | 4.03E-03 |          | 1.02E-03 | 1.15 | 1.25 |      | 1.40 |
| rc_AI011678_at   | Y | T | 5 |  | 316.3  | 22.565  | YT | 1.65E-05 | 2.96E-06 | 1.02E-03 |          | 1.61 | 1.76 | 1.40 |      |
| rc_AI011738_at   | O | C | 5 |  | 1952.4 | 57.491  | OC |          | 2.33E-05 | 1.02E-02 | 1.23E-06 |      | 1.80 | 1.21 | 2.19 |
| rc_AI011738_at   | O | T | 4 |  | 1081.7 | 73.367  | OT | 2.33E-05 |          | 2.64E-07 | 2.12E-01 | 1.80 |      | 2.18 | 1.21 |
| rc_AI011738_at   | Y | C | 5 |  | 2352.9 | 164.035 | YC | 1.02E-02 | 2.64E-07 |          | 2.01E-08 | 1.21 | 2.18 |      | 2.63 |
| rc_AI011738_at   | Y | T | 5 |  | 893.1  | 37.242  | YT | 1.23E-06 | 2.12E-01 | 2.01E-08 |          | 2.19 | 1.21 | 2.63 |      |
| rc_AI012145_s_at | O | C | 5 |  | 3877.1 | 173.461 | OC |          | 4.98E-02 | 3.95E-04 | 8.15E-05 |      | 1.17 | 1.29 | 1.53 |
| rc_AI012145_s_at | O | T | 4 |  | 3307.7 | 290.094 | OT | 4.98E-02 |          | 1.18E-05 | 1.08E-02 | 1.17 |      | 1.52 | 1.31 |
| rc_AI012145_s_at | Y | C | 5 |  | 5018.5 | 185.204 | YC | 3.95E-04 | 1.18E-05 |          | 5.84E-08 | 1.29 | 1.52 |      | 1.98 |
| rc_AI012145_s_at | Y | T | 5 |  | 2531.6 | 62.257  | YT | 8.15E-05 | 1.08E-02 | 5.84E-08 |          | 1.53 | 1.31 | 1.98 |      |

|                  |   |   |   |   |        |         |    |          |          |          |          |      |      |      |      |
|------------------|---|---|---|---|--------|---------|----|----------|----------|----------|----------|------|------|------|------|
| rc_AI013250_s_at | O | C | 5 |   | 938.3  | 18.270  | OC |          | 9.11E-04 | 1.38E-02 | 3.28E-06 |      | 1.33 | 1.16 | 1.67 |
| rc_AI013250_s_at | O | T | 4 |   | 707.8  | 22.327  | OT | 9.11E-04 |          | 6.56E-06 | 1.89E-02 | 1.33 |      | 1.53 | 1.26 |
| rc_AI013250_s_at | Y | C | 5 |   | 1085.4 | 44.074  | YC | 1.38E-02 | 6.56E-06 |          | 5.35E-08 | 1.16 | 1.53 |      | 1.94 |
| rc_AI013250_s_at | Y | T | 5 |   | 560.5  | 51.424  | YT | 3.28E-06 | 1.89E-02 | 5.35E-08 |          | 1.67 | 1.26 | 1.94 |      |
| rc_AI014132_at   | O | C | 5 |   | 1271.7 | 65.452  | OC |          | 3.18E-04 | 8.48E-07 | 3.86E-04 |      | 1.93 | 1.78 | 1.80 |
| rc_AI014132_at   | O | T | 4 |   | 660.4  | 44.831  | OT | 3.18E-04 |          | 3.47E-09 | 7.26E-01 | 1.93 |      | 3.43 | 1.07 |
| rc_AI014132_at   | Y | C | 5 |   | 2265.9 | 137.065 | YC | 8.48E-07 | 3.47E-09 |          | 2.32E-09 | 1.78 | 3.43 |      | 3.20 |
| rc_AI014132_at   | Y | T | 5 |   | 707.4  | 67.881  | YT | 3.86E-04 | 7.26E-01 | 2.32E-09 |          | 1.80 | 1.07 | 3.20 |      |
| rc_AI029702_at   | O | C | 5 |   | 1346.3 | 51.089  | OC |          | 1.97E-06 | 8.29E-05 | 2.56E-08 |      | 1.87 | 1.31 | 2.62 |
| rc_AI029702_at   | O | T | 4 |   | 718.7  | 47.252  | OT | 1.97E-06 |          | 2.45E-09 | 2.73E-02 | 1.87 |      | 2.46 | 1.40 |
| rc_AI029702_at   | Y | C | 5 |   | 1769.0 | 81.421  | YC | 8.29E-05 | 2.45E-09 |          | 8.84E-11 | 1.31 | 2.46 |      | 3.45 |
| rc_AI029702_at   | Y | T | 5 |   | 513.4  | 34.302  | YT | 2.56E-08 | 2.73E-02 | 8.84E-11 |          | 2.62 | 1.40 | 3.45 |      |
| rc_AI029745_at   | O | C | 5 |   | 198.5  | 11.584  | OC |          | 7.22E-01 | 2.97E-07 | 2.66E-02 |      | 1.07 | 2.67 | 1.47 |
| rc_AI029745_at   | O | T | 4 |   | 213.1  | 21.735  | OT | 7.22E-01 |          | 1.08E-06 | 6.95E-02 | 1.07 |      | 2.48 | 1.37 |
| rc_AI029745_at   | Y | C | 5 |   | 529.3  | 41.215  | YC | 2.97E-07 | 1.08E-06 |          | 1.54E-05 | 2.67 | 2.48 |      | 1.81 |
| rc_AI029745_at   | Y | T | 5 |   | 291.8  | 24.203  | YT | 2.66E-02 | 6.95E-02 | 1.54E-05 |          | 1.47 | 1.37 | 1.81 |      |
| rc_AI045040_at   | O | C | 5 |   | 450.2  | 43.808  | OC |          | 1.65E-03 | 1.39E-02 | 5.74E-09 |      | 2.38 | 1.95 | 4.99 |
| rc_AI045040_at   | O | T | 4 |   | 1071.4 | 97.541  | OT | 1.65E-03 |          | 2.48E-01 | 2.82E-06 | 2.38 |      | 1.22 | 2.10 |
| rc_AI045040_at   | Y | C | 5 |   | 876.4  | 136.973 | YC | 1.39E-02 | 2.48E-01 |          | 2.06E-07 | 1.95 | 1.22 |      | 2.57 |
| rc_AI045040_at   | Y | T | 5 |   | 2248.5 | 132.335 | YT | 5.74E-09 | 2.82E-06 | 2.06E-07 |          | 4.99 | 2.10 | 2.57 |      |
| rc_AI045107_at   | O | C | 5 |   | 5641.0 | 230.297 | OC |          | 3.42E-01 | 1.92E-04 | 2.30E-04 |      | 1.07 | 1.30 | 1.42 |
| rc_AI045107_at   | O | T | 4 |   | 5282.4 | 226.792 | OT | 3.42E-01 |          | 5.03E-05 | 2.90E-03 | 1.07 |      | 1.39 | 1.33 |
| rc_AI045107_at   | Y | C | 5 |   | 7328.4 | 307.954 | YC | 1.92E-04 | 5.03E-05 |          | 7.34E-08 | 1.30 | 1.39 |      | 1.84 |
| rc_AI045107_at   | Y | T | 5 |   | 3985.5 | 208.428 | YT | 2.30E-04 | 2.90E-03 | 7.34E-08 |          | 1.42 | 1.33 | 1.84 |      |
| rc_AI045368_at   | O | C | 5 |   | 948.3  | 18.927  | OC |          | 1.30E-07 | 9.06E-04 | 3.25E-08 |      | 2.47 | 1.25 | 2.66 |
| rc_AI045368_at   | O | T | 4 |   | 383.8  | 54.017  | OT | 1.30E-07 |          | 1.19E-09 | 6.60E-01 | 2.47 |      | 3.09 | 1.08 |
| rc_AI045368_at   | Y | C | 5 |   | 1184.5 | 55.832  | YC | 9.06E-04 | 1.19E-09 |          | 3.28E-10 | 1.25 | 3.09 |      | 3.32 |
| rc_AI045368_at   | Y | T | 5 |   | 356.5  | 30.468  | YT | 3.25E-08 | 6.60E-01 | 3.28E-10 |          | 2.66 | 1.08 | 3.32 |      |
| rc_AI058656_at   | O | C | 5 |   | 255.6  | 15.566  | OC |          | 5.41E-02 | 8.87E-01 | 3.92E-07 |      | 1.32 | 1.02 | 2.24 |
| rc_AI058656_at   | O | T | 4 |   | 338.3  | 35.717  | OT | 5.41E-02 |          | 4.18E-02 | 2.69E-05 | 1.32 |      | 1.35 | 1.70 |
| rc_AI058656_at   | Y | C | 5 |   | 250.3  | 13.428  | YC | 8.87E-01 | 4.18E-02 |          | 3.17E-07 | 1.02 | 1.35 |      | 2.29 |
| rc_AI058656_at   | Y | T | 5 |   | 573.4  | 37.666  | YT | 3.92E-07 | 2.69E-05 | 3.17E-07 |          | 2.24 | 1.70 | 2.29 |      |
| rc_AI058957_s_at | O | C | 5 |   | 163.4  | 7.327   | OC |          | 1.84E-07 | 4.57E-08 | 1.04E-08 |      | 2.44 | 1.62 | 3.26 |
| rc_AI058957_s_at | O | T | 4 |   | 66.8   | 6.649   | OT | 1.84E-07 |          | 9.45E-12 | 1.39E-01 | 2.44 |      | 3.96 | 1.33 |
| rc_AI058957_s_at | Y | C | 5 |   | 264.7  | 8.905   | YC | 4.57E-08 | 9.45E-12 |          | 1.25E-12 | 1.62 | 3.96 |      | 5.28 |
| rc_AI058957_s_at | Y | T | 5 |   | 50.2   | 5.513   | YT | 1.04E-08 | 1.39E-01 | 1.25E-12 |          | 3.26 | 1.33 | 5.28 |      |
| rc_AI060224_at   | O | C | 5 |   | 202.5  | 8.108   | OC |          | 3.14E-02 | 1.42E-03 | 1.44E-03 |      | 1.75 | 1.66 | 2.97 |
| rc_AI060224_at   | O | T | 4 |   | 115.7  | 14.692  | OT | 3.14E-02 |          | 2.22E-05 | 2.14E-01 | 1.75 |      | 2.91 | 1.70 |
| rc_AI060224_at   | Y | C | 5 |   | 336.9  | 43.930  | YC | 1.42E-03 | 2.22E-05 |          | 1.18E-06 | 1.66 | 2.91 |      | 4.94 |
| rc_AI060224_at   | Y | T | 5 |   | 68.2   | 10.144  | YT | 1.44E-03 | 2.14E-01 | 1.18E-06 |          | 2.97 | 1.70 | 4.94 |      |
| rc_AI105417_at   | O | C | 5 |   | 67.1   | 3.656   | OC |          | 5.89E-01 | 5.64E-06 | 8.13E-01 |      | 1.33 | 3.97 | 1.11 |
| rc_AI105417_at   | O | T | 4 | 1 | 50.6   | 4.767   | OT | 5.89E-01 |          | 2.13E-06 | 4.40E-01 | 1.33 |      | 5.27 | 1.47 |
| rc_AI105417_at   | Y | C | 5 |   | 266.2  | 40.826  | YC | 5.64E-06 | 2.13E-06 |          | 8.74E-06 | 3.97 | 5.27 |      | 3.58 |
| rc_AI105417_at   | Y | T | 5 |   | 74.3   | 9.709   | YT | 8.13E-01 | 4.40E-01 | 8.74E-06 |          | 1.11 | 1.47 | 3.58 |      |



|                  |   |   |   |   |       |        |    |          |          |          |          |      |      |      |      |
|------------------|---|---|---|---|-------|--------|----|----------|----------|----------|----------|------|------|------|------|
| rc_H31479_at     | O | C |   | 5 | 9.9   | 0.929  | OC |          | 7.64E-06 | 2.03E-01 | 9.63E-01 |      | 2.37 | 1.39 | 1.01 |
| rc_H31479_at     | O | T | 5 |   | 23.6  | 1.862  | OT | 7.64E-06 |          | 7.64E-07 | 7.01E-06 | 2.37 |      | 3.31 | 2.40 |
| rc_H31479_at     | Y | C |   | 5 | 7.1   | 0.966  | YC | 2.03E-01 | 7.64E-07 |          | 2.19E-01 | 1.39 | 3.31 |      | 1.38 |
| rc_H31479_at     | Y | T |   | 5 | 9.8   | 1.906  | YT | 9.63E-01 | 7.01E-06 | 2.19E-01 |          | 1.01 | 2.40 | 1.38 |      |
| rc_AA819129_at   | O | C |   | 5 | 143.2 | 11.664 | OC |          | 2.65E-02 | 1.82E-01 | 2.94E-05 |      | 1.95 | 2.18 | 3.23 |
| rc_AA819129_at   | O | T | 5 |   | 278.9 | 38.889 | OT | 2.65E-02 |          | 1.45E-03 | 4.39E-03 | 1.95 |      | 4.24 | 1.66 |
| rc_AA819129_at   | Y | C |   | 5 | 65.8  | 6.850  | YC | 1.82E-01 | 1.45E-03 |          | 2.30E-06 | 2.18 | 4.24 |      | 7.03 |
| rc_AA819129_at   | Y | T | 5 |   | 462.9 | 66.866 | YT | 2.94E-05 | 4.39E-03 | 2.30E-06 |          | 3.23 | 1.66 | 7.03 |      |
| rc_AI171103_at   | O | C |   | 5 | 113.5 | 9.571  | OC |          | 7.03E-02 | 4.97E-01 | 2.26E-06 |      | 1.31 | 1.12 | 2.14 |
| rc_AI171103_at   | O | T | 5 |   | 148.4 | 12.590 | OT | 7.03E-02 |          | 1.80E-02 | 8.40E-05 | 1.31 |      | 1.47 | 1.63 |
| rc_AI171103_at   | Y | C | 4 | 1 | 100.9 | 9.876  | YC | 4.97E-01 | 1.80E-02 |          | 7.01E-07 | 1.12 | 1.47 |      | 2.40 |
| rc_AI171103_at   | Y | T | 5 |   | 242.5 | 17.360 | YT | 2.26E-06 | 8.40E-05 | 7.01E-07 |          | 2.14 | 1.63 | 2.40 |      |
| rc_AI104675_at   | O | C | 1 | 4 | 125.3 | 9.109  | OC |          | 2.90E-05 | 1.25E-01 | 2.15E-01 |      | 1.78 | 1.28 | 1.21 |
| rc_AI104675_at   | O | T | 5 |   | 223.5 | 18.493 | OT | 2.90E-05 |          | 1.55E-06 | 2.72E-06 | 1.78 |      | 2.29 | 2.16 |
| rc_AI104675_at   | Y | C |   | 5 | 97.7  | 9.218  | YC | 1.25E-01 | 1.55E-06 |          | 7.49E-01 | 1.28 | 2.29 |      | 1.06 |
| rc_AI104675_at   | Y | T | 2 | 3 | 103.3 | 8.439  | YT | 2.15E-01 | 2.72E-06 | 7.49E-01 |          | 1.21 | 2.16 | 1.06 |      |
| M77694_at        | O | C | 1 | 4 | 30.4  | 1.649  | OC |          | 1.26E-03 | 7.47E-01 | 8.81E-07 |      | 2.24 | 1.12 | 3.46 |
| M77694_at        | O | T | 5 |   | 68.2  | 5.823  | OT | 1.26E-03 |          | 6.34E-04 | 1.53E-03 | 2.24 |      | 2.51 | 1.54 |
| M77694_at        | Y | C | 1 | 4 | 27.2  | 3.646  | YC | 7.47E-01 | 6.34E-04 |          | 5.15E-07 | 1.12 | 2.51 |      | 3.86 |
| M77694_at        | Y | T | 5 |   | 105.2 | 11.737 | YT | 8.81E-07 | 1.53E-03 | 5.15E-07 |          | 3.46 | 1.54 | 3.86 |      |
| rc_AI169075_at   | O | C | 1 | 4 | 169.2 | 16.881 | OC |          | 1.76E-03 | 4.31E-01 | 1.86E-11 |      | 2.11 | 1.24 | 5.88 |
| rc_AI169075_at   | O | T | 5 |   | 357.2 | 6.652  | OT | 1.76E-03 |          | 9.60E-03 | 8.78E-10 | 2.11 |      | 1.70 | 2.79 |
| rc_AI169075_at   | Y | C | 3 | 2 | 209.7 | 14.156 | YC | 4.31E-01 | 9.60E-03 |          | 3.99E-11 | 1.24 | 1.70 |      | 4.75 |
| rc_AI169075_at   | Y | T | 5 |   | 995.2 | 67.079 | YT | 1.86E-11 | 8.78E-10 | 3.99E-11 |          | 5.88 | 2.79 | 4.75 |      |
| rc_AI072992_at   | O | C | 4 | 1 | 78.1  | 5.521  | OC |          | 3.02E-02 | 2.33E-02 | 2.17E-04 |      | 1.23 | 1.20 | 1.61 |
| rc_AI072992_at   | O | T | 5 |   | 63.3  | 3.553  | OT | 3.02E-02 |          | 1.65E-04 | 3.05E-02 | 1.23 |      | 1.48 | 1.30 |
| rc_AI072992_at   | Y | C | 5 |   | 93.7  | 5.478  | YC | 2.33E-02 | 1.65E-04 |          | 1.91E-06 | 1.20 | 1.48 |      | 1.93 |
| rc_AI072992_at   | Y | T | 3 | 2 | 48.6  | 2.070  | YT | 2.17E-04 | 3.05E-02 | 1.91E-06 |          | 1.61 | 1.30 | 1.93 |      |
| rc_AI104483_at   | O | C | 4 | 1 | 155.0 | 16.230 | OC |          | 3.88E-01 | 2.50E-03 | 2.15E-03 |      | 1.09 | 1.35 | 1.55 |
| rc_AI104483_at   | O | T | 5 |   | 141.6 | 3.075  | OT | 3.88E-01 |          | 3.89E-04 | 1.38E-02 | 1.09 |      | 1.47 | 1.41 |
| rc_AI104483_at   | Y | C | 5 |   | 208.7 | 8.163  | YC | 2.50E-03 | 3.89E-04 |          | 2.00E-06 | 1.35 | 1.47 |      | 2.08 |
| rc_AI104483_at   | Y | T | 4 | 1 | 100.1 | 10.570 | YT | 2.15E-03 | 1.38E-02 | 2.00E-06 |          | 1.55 | 1.41 | 2.08 |      |
| rc_AA800168_at   | O | C | 4 | 1 | 49.8  | 5.566  | OC |          | 4.28E-02 | 3.62E-01 | 2.98E-06 |      | 1.30 | 1.15 | 1.96 |
| rc_AA800168_at   | O | T | 5 |   | 64.8  | 4.699  | OT | 4.28E-02 |          | 6.36E-03 | 1.95E-04 | 1.30 |      | 1.50 | 1.51 |
| rc_AA800168_at   | Y | C | 3 | 2 | 43.4  | 2.728  | YC | 3.62E-01 | 6.36E-03 |          | 6.10E-07 | 1.15 | 1.50 |      | 2.25 |
| rc_AA800168_at   | Y | T | 5 |   | 97.7  | 5.764  | YT | 2.98E-06 | 1.95E-04 | 6.10E-07 |          | 1.96 | 1.51 | 2.25 |      |
| rc_AA892380_at   | O | C | 4 | 1 | 159.8 | 6.165  | OC |          | 1.38E-02 | 9.37E-01 | 1.83E-06 |      | 1.25 | 1.01 | 1.66 |
| rc_AA892380_at   | O | T | 5 |   | 199.7 | 11.040 | OT | 1.38E-02 |          | 1.17E-02 | 3.49E-04 | 1.25 |      | 1.26 | 1.33 |
| rc_AA892380_at   | Y | C | 4 | 1 | 158.6 | 7.332  | YC | 9.37E-01 | 1.17E-02 |          | 1.59E-06 | 1.01 | 1.26 |      | 1.67 |
| rc_AA892380_at   | Y | T | 5 |   | 265.0 | 14.274 | YT | 1.83E-06 | 3.49E-04 | 1.59E-06 |          | 1.66 | 1.33 | 1.67 |      |
| rc_AI102083_s_at | O | C | 4 | 1 | 124.6 | 3.915  | OC |          | 6.88E-06 | 1.74E-06 | 1.14E-07 |      | 1.63 | 1.71 | 1.87 |
| rc_AI102083_s_at | O | T | 5 |   | 203.2 | 9.417  | OT | 6.88E-06 |          | 4.47E-01 | 2.47E-02 | 1.63 |      | 1.05 | 1.15 |
| rc_AI102083_s_at | Y | C | 5 |   | 212.6 | 3.036  | YC | 1.74E-06 | 4.47E-01 |          | 1.09E-01 | 1.71 | 1.05 |      | 1.10 |
| rc_AI102083_s_at | Y | T | 5 |   | 233.1 | 13.296 | YT | 1.14E-07 | 2.47E-02 | 1.09E-01 |          | 1.87 | 1.15 | 1.10 |      |

|                  |   |   |   |   |        |         |    |          |          |          |          |       |      |      |       |
|------------------|---|---|---|---|--------|---------|----|----------|----------|----------|----------|-------|------|------|-------|
| rc_AI171772_at   | O | C | 4 | 1 | 51.3   | 4.862   | OC |          | 2.36E-01 | 5.27E-01 | 1.21E-09 |       | 1.68 | 1.36 | 7.90  |
| rc_AI171772_at   | O | T | 5 |   | 86.3   | 10.910  | OT | 2.36E-01 |          | 5.67E-01 | 5.47E-09 | 1.68  |      | 1.24 | 4.69  |
| rc_AI171772_at   | Y | C | 5 |   | 69.7   | 4.037   | YC | 5.27E-01 | 5.67E-01 |          | 2.64E-09 | 1.36  | 1.24 |      | 5.81  |
| rc_AI171772_at   | Y | T | 5 |   | 404.9  | 38.159  | YT | 1.21E-09 | 5.47E-09 | 2.64E-09 |          | 7.90  | 4.69 | 5.81 |       |
| rc_AI227690_at   | O | C | 4 | 1 | 179.6  | 8.087   | OC |          | 2.38E-03 | 8.17E-01 | 1.17E-09 |       | 2.26 | 1.08 | 5.36  |
| rc_AI227690_at   | O | T | 5 |   | 405.7  | 46.947  | OT | 2.38E-03 |          | 3.91E-03 | 1.42E-07 | 2.26  |      | 2.09 | 2.37  |
| rc_AI227690_at   | Y | C | 5 |   | 194.3  | 8.087   | YC | 8.17E-01 | 3.91E-03 |          | 1.55E-09 | 1.08  | 2.09 |      | 4.95  |
| rc_AI227690_at   | Y | T | 5 |   | 962.3  | 74.425  | YT | 1.17E-09 | 1.42E-07 | 1.55E-09 |          | 5.36  | 2.37 | 4.95 |       |
| U75929UTR#1_f_at | O | C | 4 | 1 | 146.0  | 12.314  | OC |          | 8.64E-01 | 5.23E-09 | 2.99E-03 |       | 1.05 | 4.06 | 1.95  |
| U75929UTR#1_f_at | O | T | 5 |   | 139.1  | 14.616  | OT | 8.64E-01 |          | 4.20E-09 | 2.07E-03 | 1.05  |      | 4.26 | 2.05  |
| U75929UTR#1_f_at | Y | C | 5 |   | 593.2  | 36.274  | YC | 5.23E-09 | 4.20E-09 |          | 8.33E-07 | 4.06  | 4.26 |      | 2.08  |
| U75929UTR#1_f_at | Y | T | 5 |   | 285.0  | 38.485  | YT | 2.99E-03 | 2.07E-03 | 8.33E-07 |          | 1.95  | 2.05 | 2.08 |       |
| X65747_at        | O | C | 5 |   | 81.6   | 5.850   | OC |          | 9.28E-07 | 2.75E-08 | 3.95E-10 |       | 2.09 | 3.11 | 11.36 |
| X65747_at        | O | T | 5 |   | 39.0   | 2.610   | OT | 9.28E-07 |          | 3.44E-02 | 3.00E-05 | 2.09  |      | 1.49 | 5.43  |
| X65747_at        | Y | C | 2 | 3 | 26.2   | 3.910   | YC | 2.75E-08 | 3.44E-02 |          | 3.40E-03 | 3.11  | 1.49 |      | 3.65  |
| X65747_at        | Y | T |   | 5 | 7.2    | 2.235   | YT | 3.95E-10 | 3.00E-05 | 3.40E-03 |          | 11.36 | 5.43 | 3.65 |       |
| rc_AA817993_at   | O | C | 5 |   | 1531.0 | 191.704 | OC |          | 2.93E-05 | 9.48E-07 | 7.92E-08 |       | 2.53 | 5.17 | ###   |
| rc_AA817993_at   | O | T | 5 |   | 604.1  | 114.486 | OT | 2.93E-05 |          | 7.37E-02 | 2.96E-03 | 2.53  |      | 2.04 | ###   |
| rc_AA817993_at   | Y | C | 5 |   | 296.1  | 42.311  | YC | 9.48E-07 | 7.37E-02 |          | 1.32E-01 | 5.17  | 2.04 |      | 7.25  |
| rc_AA817993_at   | Y | T |   | 5 | 40.8   | 12.450  | YT | 7.92E-08 | 2.96E-03 | 1.32E-01 |          | ###   | ###  | 7.25 |       |
| rc_AA818604_s_at | O | C | 5 |   | 264.8  | 29.934  | OC |          | 5.44E-07 | 1.80E-05 | 4.47E-08 |       | 4.36 | 2.37 | ###   |
| rc_AA818604_s_at | O | T | 5 |   | 60.7   | 7.483   | OT | 5.44E-07 |          | 6.31E-02 | 1.20E-01 | 4.36  |      | 1.84 | 3.21  |
| rc_AA818604_s_at | Y | C | 5 |   | 111.6  | 17.902  | YC | 1.80E-05 | 6.31E-02 |          | 2.21E-03 | 2.37  | 1.84 |      | 5.90  |
| rc_AA818604_s_at | Y | T | 1 | 4 | 18.9   | 5.032   | YT | 4.47E-08 | 1.20E-01 | 2.21E-03 |          | ###   | 3.21 | 5.90 |       |
| AA684537_at      | O | C | 5 |   | 413.3  | 25.764  | OC |          | 3.79E-05 | 5.70E-03 | 7.71E-07 |       | 1.79 | 1.25 | 2.57  |
| AA684537_at      | O | T | 5 |   | 231.0  | 14.493  | OT | 3.79E-05 |          | 1.54E-07 | 4.52E-02 | 1.79  |      | 2.24 | 1.44  |
| AA684537_at      | Y | C | 5 |   | 516.7  | 31.724  | YC | 5.70E-03 | 1.54E-07 |          | 7.29E-09 | 1.25  | 2.24 |      | 3.22  |
| AA684537_at      | Y | T | 3 | 2 | 160.5  | 14.875  | YT | 7.71E-07 | 4.52E-02 | 7.29E-09 |          | 2.57  | 1.44 | 3.22 |       |
| AB000362_at      | O | C | 5 |   | 65.1   | 14.446  | OC |          | 4.04E-06 | 1.16E-01 | 3.20E-01 |       | 2.89 | 1.85 | 1.28  |
| AB000362_at      | O | T | 5 |   | 188.2  | 14.569  | OT | 4.04E-06 |          | 2.54E-07 | 2.69E-05 | 2.89  |      | 5.35 | 2.25  |
| AB000362_at      | Y | C | 5 |   | 35.2   | 3.114   | YC | 1.16E-01 | 2.54E-07 |          | 1.62E-02 | 1.85  | 5.35 |      | 2.38  |
| AB000362_at      | Y | T | 4 | 1 | 83.6   | 14.801  | YT | 3.20E-01 | 2.69E-05 | 1.62E-02 |          | 1.28  | 2.25 | 2.38 |       |
| M22253_at        | O | C | 5 |   | 106.2  | 10.713  | OC |          | 6.40E-07 | 5.58E-06 | 3.45E-08 |       | 3.48 | 2.49 | 8.79  |
| M22253_at        | O | T | 5 |   | 30.5   | 1.720   | OT | 6.40E-07 |          | 2.25E-01 | 7.22E-02 | 3.48  |      | 1.40 | 2.52  |
| M22253_at        | Y | C | 5 |   | 42.6   | 7.632   | YC | 5.58E-06 | 2.25E-01 |          | 5.73E-03 | 2.49  | 1.40 |      | 3.52  |
| M22253_at        | Y | T | 4 | 1 | 12.1   | 2.684   | YT | 3.45E-08 | 7.22E-02 | 5.73E-03 |          | 8.79  | 2.52 | 3.52 |       |
| rc_AI237589_at   | O | C | 5 |   | 217.5  | 16.291  | OC |          | 9.03E-01 | 1.66E-05 | 1.66E-02 |       | 1.02 | 1.73 | 1.47  |
| rc_AI237589_at   | O | T | 5 |   | 214.3  | 18.200  | OT | 9.03E-01 |          | 1.32E-05 | 2.13E-02 | 1.02  |      | 1.75 | 1.45  |
| rc_AI237589_at   | Y | C | 5 |   | 375.4  | 26.786  | YC | 1.66E-05 | 1.32E-05 |          | 1.74E-07 | 1.73  | 1.75 |      | 2.54  |
| rc_AI237589_at   | Y | T | 4 | 1 | 147.7  | 6.677   | YT | 1.66E-02 | 2.13E-02 | 1.74E-07 |          | 1.47  | 1.45 | 2.54 |       |
| rc_AI171193_at   | O | C | 5 |   | 81.4   | 6.204   | OC |          | 1.82E-03 | 3.13E-01 | 2.92E-06 |       | 1.70 | 1.24 | 2.32  |
| rc_AI171193_at   | O | T | 5 |   | 138.5  | 18.550  | OT | 1.82E-03 |          | 2.08E-04 | 4.66E-03 | 1.70  |      | 2.12 | 1.36  |
| rc_AI171193_at   | Y | C | 2 | 3 | 65.5   | 4.075   | YC | 3.13E-01 | 2.08E-04 |          | 5.05E-07 | 1.24  | 2.12 |      | 2.89  |
| rc_AI171193_at   | Y | T | 5 |   | 188.9  | 8.360   | YT | 2.92E-06 | 4.66E-03 | 5.05E-07 |          | 2.32  | 1.36 | 2.89 |       |

|                 |   |   |   |   |        |         |    |          |          |          |          |      |      |      |      |
|-----------------|---|---|---|---|--------|---------|----|----------|----------|----------|----------|------|------|------|------|
| H31125_f_at     | O | C | 5 |   | 254.3  | 23.152  | OC |          | 3.81E-07 | 3.74E-01 | 1.09E-02 |      | 2.80 | 1.25 | 1.63 |
| H31125_f_at     | O | T | 5 |   | 712.4  | 65.696  | OT | 3.81E-07 |          | 9.35E-08 | 6.47E-05 | 2.80 |      | 3.50 | 1.72 |
| H31125_f_at     | Y | C | 3 | 2 | 203.4  | 29.208  | YC | 3.74E-01 | 9.35E-08 |          | 1.59E-03 | 1.25 | 3.50 |      | 2.04 |
| H31125_f_at     | Y | T | 5 |   | 414.5  | 22.043  | YT | 1.09E-02 | 6.47E-05 | 1.59E-03 |          | 1.63 | 1.72 | 2.04 |      |
| AB002086_at     | O | C | 5 |   | 554.2  | 40.424  | OC |          | 1.03E-04 | 8.81E-05 | 1.01E-06 |      | 1.36 | 1.58 | 1.54 |
| AB002086_at     | O | T | 5 |   | 755.0  | 22.485  | OT | 1.03E-04 |          | 1.78E-08 | 2.30E-02 | 1.36 |      | 2.15 | 1.13 |
| AB002086_at     | Y | C | 5 |   | 350.4  | 18.927  | YC | 8.81E-05 | 1.78E-08 |          | 7.75E-10 | 1.58 | 2.15 |      | 2.44 |
| AB002086_at     | Y | T | 5 |   | 853.5  | 24.016  | YT | 1.01E-06 | 2.30E-02 | 7.75E-10 |          | 1.54 | 1.13 | 2.44 |      |
| AF034237_s_at   | O | C | 5 |   | 141.8  | 5.054   | OC |          | 2.54E-01 | 3.21E-06 | 2.74E-01 |      | 1.10 | 1.59 | 1.10 |
| AF034237_s_at   | O | T | 5 |   | 156.0  | 4.264   | OT | 2.54E-01 |          | 2.83E-05 | 9.61E-01 | 1.10 |      | 1.45 | 1.00 |
| AF034237_s_at   | Y | C | 5 |   | 225.5  | 13.363  | YC | 3.21E-06 | 2.83E-05 |          | 2.57E-05 | 1.59 | 1.45 |      | 1.45 |
| AF034237_s_at   | Y | T | 5 |   | 155.4  | 8.182   | YT | 2.74E-01 | 9.61E-01 | 2.57E-05 |          | 1.10 | 1.00 | 1.45 |      |
| D13123_s_at     | O | C | 5 |   | 3494.4 | 111.153 | OC |          | 3.29E-07 | 3.61E-05 | 2.24E-09 |      | 1.58 | 1.25 | 2.11 |
| D13123_s_at     | O | T | 5 |   | 2213.7 | 102.905 | OT | 3.29E-07 |          | 2.19E-10 | 2.38E-03 | 1.58 |      | 1.97 | 1.33 |
| D13123_s_at     | Y | C | 5 |   | 4363.8 | 140.594 | YC | 3.61E-05 | 2.19E-10 |          | 6.91E-12 | 1.25 | 1.97 |      | 2.63 |
| D13123_s_at     | Y | T | 5 |   | 1659.4 | 67.883  | YT | 2.24E-09 | 2.38E-03 | 6.91E-12 |          | 2.11 | 1.33 | 2.63 |      |
| D14014_at       | O | C | 5 |   | 108.0  | 7.813   | OC |          | 1.49E-01 | 3.82E-04 | 2.83E-02 |      | 1.22 | 1.53 | 1.40 |
| D14014_at       | O | T | 5 |   | 88.5   | 2.863   | OT | 1.49E-01 |          | 1.88E-05 | 3.83E-01 | 1.22 |      | 1.87 | 1.15 |
| D14014_at       | Y | C | 5 |   | 165.5  | 14.445  | YC | 3.82E-04 | 1.88E-05 |          | 3.65E-06 | 1.53 | 1.87 |      | 2.15 |
| D14014_at       | Y | T | 5 |   | 77.0   | 7.257   | YT | 2.83E-02 | 3.83E-01 | 3.65E-06 |          | 1.40 | 1.15 | 2.15 |      |
| D16478_g_at     | O | C | 5 |   | 1564.4 | 32.376  | OC |          | 9.42E-03 | 3.45E-03 | 4.64E-04 |      | 1.22 | 1.21 | 1.36 |
| D16478_g_at     | O | T | 5 |   | 1286.6 | 75.035  | OT | 9.42E-03 |          | 9.17E-06 | 1.71E-01 | 1.22 |      | 1.47 | 1.12 |
| D16478_g_at     | Y | C | 5 |   | 1887.2 | 97.377  | YC | 3.45E-03 | 9.17E-06 |          | 7.56E-07 | 1.21 | 1.47 |      | 1.64 |
| D16478_g_at     | Y | T | 5 |   | 1151.7 | 39.727  | YT | 4.64E-04 | 1.71E-01 | 7.56E-07 |          | 1.36 | 1.12 | 1.64 |      |
| D42137exon_s_at | O | C | 5 |   | 747.7  | 30.827  | OC |          | 3.73E-03 | 2.79E-04 | 2.16E-05 |      | 1.31 | 1.32 | 1.70 |
| D42137exon_s_at | O | T | 5 |   | 571.5  | 26.343  | OT | 3.73E-03 |          | 5.38E-07 | 2.24E-02 | 1.31 |      | 1.73 | 1.30 |
| D42137exon_s_at | Y | C | 5 |   | 988.3  | 58.861  | YC | 2.79E-04 | 5.38E-07 |          | 1.30E-08 | 1.32 | 1.73 |      | 2.25 |
| D42137exon_s_at | Y | T | 5 |   | 440.1  | 17.138  | YT | 2.16E-05 | 2.24E-02 | 1.30E-08 |          | 1.70 | 1.30 | 2.25 |      |
| D44495_s_at     | O | C | 5 |   | 279.2  | 13.065  | OC |          | 3.05E-07 | 4.60E-01 | 1.57E-03 |      | 1.77 | 1.07 | 1.35 |
| D44495_s_at     | O | T | 5 |   | 494.1  | 10.536  | OT | 3.05E-07 |          | 1.04E-06 | 3.14E-04 | 1.77 |      | 1.65 | 1.31 |
| D44495_s_at     | Y | C | 5 |   | 298.6  | 22.084  | YC | 4.60E-01 | 1.04E-06 |          | 7.71E-03 | 1.07 | 1.65 |      | 1.26 |
| D44495_s_at     | Y | T | 5 |   | 376.8  | 23.417  | YT | 1.57E-03 | 3.14E-04 | 7.71E-03 |          | 1.35 | 1.31 | 1.26 |      |
| D50694_at       | O | C | 5 |   | 673.7  | 20.456  | OC |          | 4.55E-02 | 1.36E-01 | 2.63E-05 |      | 1.23 | 1.20 | 1.62 |
| D50694_at       | O | T | 5 |   | 828.9  | 38.195  | OT | 4.55E-02 |          | 1.78E-03 | 2.18E-03 | 1.23 |      | 1.48 | 1.31 |
| D50694_at       | Y | C | 5 |   | 561.3  | 31.181  | YC | 1.36E-01 | 1.78E-03 |          | 1.53E-06 | 1.20 | 1.48 |      | 1.94 |
| D50694_at       | Y | T | 5 |   | 1089.7 | 85.924  | YT | 2.63E-05 | 2.18E-03 | 1.53E-06 |          | 1.62 | 1.31 | 1.94 |      |
| D50695_at       | O | C | 5 |   | 374.0  | 3.853   | OC |          | 5.62E-03 | 7.52E-02 | 6.78E-07 |      | 1.23 | 1.16 | 1.56 |
| D50695_at       | O | T | 5 |   | 459.2  | 20.503  | OT | 5.62E-03 |          | 1.07E-04 | 2.51E-04 | 1.23 |      | 1.42 | 1.27 |
| D50695_at       | Y | C | 5 |   | 323.2  | 9.230   | YC | 7.52E-02 | 1.07E-04 |          | 3.74E-08 | 1.16 | 1.42 |      | 1.81 |
| D50695_at       | Y | T | 5 |   | 584.0  | 30.022  | YT | 6.78E-07 | 2.51E-04 | 3.74E-08 |          | 1.56 | 1.27 | 1.81 |      |
| D50696_at       | O | C | 5 |   | 650.4  | 20.260  | OC |          | 7.33E-04 | 6.34E-01 | 7.05E-07 |      | 1.44 | 1.05 | 1.82 |
| D50696_at       | O | T | 5 |   | 934.8  | 41.359  | OT | 7.33E-04 |          | 2.68E-04 | 1.99E-03 | 1.44 |      | 1.51 | 1.27 |
| D50696_at       | Y | C | 5 |   | 617.3  | 38.009  | YC | 6.34E-01 | 2.68E-04 |          | 3.23E-07 | 1.05 | 1.51 |      | 1.92 |
| D50696_at       | Y | T | 5 |   | 1186.7 | 75.922  | YT | 7.05E-07 | 1.99E-03 | 3.23E-07 |          | 1.82 | 1.27 | 1.92 |      |

|             |   |   |   |  |        |         |    |          |          |          |          |       |      |      |       |
|-------------|---|---|---|--|--------|---------|----|----------|----------|----------|----------|-------|------|------|-------|
| D85189_at   | O | C | 5 |  | 44.4   | 3.139   | OC |          | 1.28E-03 | 1.98E-03 | 4.92E-04 |       | 1.52 | 1.95 | 1.58  |
| D85189_at   | O | T | 5 |  | 67.2   | 5.399   | OT | 1.28E-03 |          | 1.09E-06 | 6.54E-01 | 1.52  |      | 2.96 | 1.04  |
| D85189_at   | Y | C | 5 |  | 22.7   | 1.959   | YC | 1.98E-03 | 1.09E-06 |          | 5.16E-07 | 1.95  | 2.96 |      | 3.08  |
| D85189_at   | Y | T | 5 |  | 69.9   | 5.106   | YT | 4.92E-04 | 6.54E-01 | 5.16E-07 |          | 1.58  | 1.04 | 3.08 |       |
| D86039_at   | O | C | 5 |  | 799.5  | 61.562  | OC |          | 2.96E-02 | 1.23E-02 | 7.93E-04 |       | 1.20 | 1.20 | 1.42  |
| D86039_at   | O | T | 5 |  | 663.6  | 23.652  | OT | 2.96E-02 |          | 8.60E-05 | 1.02E-01 | 1.20  |      | 1.45 | 1.17  |
| D86039_at   | Y | C | 5 |  | 960.1  | 37.284  | YC | 1.23E-02 | 8.60E-05 |          | 3.29E-06 | 1.20  | 1.45 |      | 1.70  |
| D86039_at   | Y | T | 5 |  | 564.8  | 27.150  | YT | 7.93E-04 | 1.02E-01 | 3.29E-06 |          | 1.42  | 1.17 | 1.70 |       |
| J02773_at   | O | C | 5 |  | 4535.0 | 204.585 | OC |          | 5.24E-03 | 1.10E-03 | 4.18E-06 |       | 1.36 | 1.33 | 2.27  |
| J02773_at   | O | T | 5 |  | 3330.9 | 370.647 | OT | 5.24E-03 |          | 2.11E-06 | 2.49E-03 | 1.36  |      | 1.81 | 1.67  |
| J02773_at   | Y | C | 5 |  | 6015.5 | 300.342 | YC | 1.10E-03 | 2.11E-06 |          | 9.53E-09 | 1.33  | 1.81 |      | 3.01  |
| J02773_at   | Y | T | 5 |  | 1995.4 | 92.466  | YT | 4.18E-06 | 2.49E-03 | 9.53E-09 |          | 2.27  | 1.67 | 3.01 |       |
| J03190_g_at | O | C | 5 |  | 142.4  | 14.393  | OC |          | 1.22E-02 | 6.57E-05 | 4.33E-03 |       | 1.58 | 1.69 | 1.75  |
| J03190_g_at | O | T | 5 |  | 90.4   | 9.449   | OT | 1.22E-02 |          | 4.21E-07 | 6.28E-01 | 1.58  |      | 2.67 | 1.11  |
| J03190_g_at | Y | C | 5 |  | 240.9  | 12.893  | YC | 6.57E-05 | 4.21E-07 |          | 1.94E-07 | 1.69  | 2.67 |      | 2.96  |
| J03190_g_at | Y | T | 5 |  | 81.3   | 14.706  | YT | 4.33E-03 | 6.28E-01 | 1.94E-07 |          | 1.75  | 1.11 | 2.96 |       |
| J05167_at   | O | C | 5 |  | 627.7  | 28.166  | OC |          | 2.31E-05 | 2.77E-02 | 1.48E-07 |       | 1.63 | 1.16 | 2.38  |
| J05167_at   | O | T | 5 |  | 385.9  | 33.294  | OT | 2.31E-05 |          | 3.40E-07 | 9.22E-03 | 1.63  |      | 1.88 | 1.46  |
| J05167_at   | Y | C | 5 |  | 727.3  | 35.463  | YC | 2.77E-02 | 3.40E-07 |          | 5.11E-09 | 1.16  | 1.88 |      | 2.75  |
| J05167_at   | Y | T | 5 |  | 264.3  | 14.789  | YT | 1.48E-07 | 9.22E-03 | 5.11E-09 |          | 2.38  | 1.46 | 2.75 |       |
| J05592_at   | O | C | 5 |  | 338.7  | 18.975  | OC |          | 8.68E-03 | 2.39E-07 | 7.61E-01 |       | 1.66 | 2.14 | 1.04  |
| J05592_at   | O | T | 5 |  | 203.9  | 18.202  | OT | 8.68E-03 |          | 3.71E-09 | 4.53E-03 | 1.66  |      | 3.55 | 1.73  |
| J05592_at   | Y | C | 5 |  | 723.5  | 55.594  | YC | 2.39E-07 | 3.71E-09 |          | 3.89E-07 | 2.14  | 3.55 |      | 2.05  |
| J05592_at   | Y | T | 5 |  | 352.7  | 16.961  | YT | 7.61E-01 | 4.53E-03 | 3.89E-07 |          | 1.04  | 1.73 | 2.05 |       |
| J05592_g_at | O | C | 5 |  | 600.1  | 37.698  | OC |          | 5.19E-02 | 3.59E-08 | 3.16E-01 |       | 1.27 | 1.99 | 1.10  |
| J05592_g_at | O | T | 5 |  | 472.4  | 39.110  | OT | 5.19E-02 |          | 2.29E-09 | 6.37E-03 | 1.27  |      | 2.53 | 1.40  |
| J05592_g_at | Y | C | 5 |  | 1196.6 | 49.973  | YC | 3.59E-08 | 2.29E-09 |          | 1.64E-07 | 1.99  | 2.53 |      | 1.80  |
| J05592_g_at | Y | T | 5 |  | 663.1  | 44.133  | YT | 3.16E-01 | 6.37E-03 | 1.64E-07 |          | 1.10  | 1.40 | 1.80 |       |
| L01624_at   | O | C | 5 |  | 71.6   | 15.598  | OC |          | 2.48E-02 | 1.68E-01 | 3.43E-05 |       | 1.68 | 1.65 | 2.55  |
| L01624_at   | O | T | 5 |  | 120.2  | 17.760  | OT | 2.48E-02 |          | 1.22E-03 | 5.57E-03 | 1.68  |      | 2.77 | 1.52  |
| L01624_at   | Y | C | 5 |  | 43.3   | 4.222   | YC | 1.68E-01 | 1.22E-03 |          | 2.42E-06 | 1.65  | 2.77 |      | 4.22  |
| L01624_at   | Y | T | 5 |  | 182.9  | 13.853  | YT | 3.43E-05 | 5.57E-03 | 2.42E-06 |          | 2.55  | 1.52 | 4.22 |       |
| L03294_g_at | O | C | 5 |  | 1507.0 | 92.073  | OC |          | 5.81E-03 | 6.61E-04 | 2.55E-04 |       | 1.33 | 1.33 | 1.57  |
| L03294_g_at | O | T | 5 |  | 1136.3 | 60.885  | OT | 5.81E-03 |          | 1.52E-06 | 1.55E-01 | 1.33  |      | 1.76 | 1.18  |
| L03294_g_at | Y | C | 5 |  | 1997.9 | 103.325 | YC | 6.61E-04 | 1.52E-06 |          | 1.39E-07 | 1.33  | 1.76 |      | 2.08  |
| L03294_g_at | Y | T | 5 |  | 962.5  | 65.620  | YT | 2.55E-04 | 1.55E-01 | 1.39E-07 |          | 1.57  | 1.18 | 2.08 |       |
| L24897_s_at | O | C | 5 |  | 204.5  | 105.207 | OC |          | 3.35E-01 | 9.63E-01 | 3.01E-09 |       | 2.37 | 1.07 | 17.13 |
| L24897_s_at | O | T | 5 |  | 485.0  | 158.928 | OT | 3.35E-01 |          | 3.58E-01 | 1.07E-08 | 2.37  |      | 2.23 | 7.22  |
| L24897_s_at | Y | C | 5 |  | 217.9  | 155.507 | YC | 9.63E-01 | 3.58E-01 |          | 3.19E-09 | 1.07  | 2.23 |      | ###   |
| L24897_s_at | Y | T | 5 |  | 3503.7 | 314.356 | YT | 3.01E-09 | 1.07E-08 | 3.19E-09 |          | 17.13 | 7.22 | ###  |       |
| L26268_at   | O | C | 5 |  | 268.9  | 15.265  | OC |          | 1.08E-03 | 3.50E-01 | 3.95E-07 |       | 1.33 | 1.09 | 1.68  |
| L26268_at   | O | T | 5 |  | 357.5  | 9.368   | OT | 1.08E-03 |          | 1.47E-04 | 6.35E-04 | 1.33  |      | 1.44 | 1.26  |
| L26268_at   | Y | C | 5 |  | 247.4  | 17.353  | YC | 3.50E-01 | 1.47E-04 |          | 8.98E-08 | 1.09  | 1.44 |      | 1.83  |
| L26268_at   | Y | T | 5 |  | 451.8  | 19.245  | YT | 3.95E-07 | 6.35E-04 | 8.98E-08 |          | 1.68  | 1.26 | 1.83 |       |

## SUPPLEMENTARY MATERIAL -CONTINUED

|                         |   |   |   |  |        |         |    |          |          |          |          |      |      |      |      |
|-------------------------|---|---|---|--|--------|---------|----|----------|----------|----------|----------|------|------|------|------|
| M27207mRNA_s_at         | O | C | 5 |  | 731.4  | 53.716  | OC |          | 2.80E-01 | 8.66E-13 | 1.58E-07 |      | 1.27 | 4.86 | 2.69 |
| M27207mRNA_s_at         | O | T | 5 |  | 574.4  | 112.480 | OT | 2.80E-01 |          | 3.76E-13 | 3.08E-08 | 1.27 |      | 6.19 | 3.42 |
| M27207mRNA_s_at         | Y | C | 5 |  | 3558.1 | 123.617 | YC | 8.66E-13 | 3.76E-13 |          | 4.70E-09 | 4.86 | 6.19 |      | 1.81 |
| M27207mRNA_s_at         | Y | T | 5 |  | 1967.0 | 92.840  | YT | 1.58E-07 | 3.08E-08 | 4.70E-09 |          | 2.69 | 3.42 | 1.81 |      |
| M38566mRNA_s_at         | O | C | 5 |  | 137.7  | 7.889   | OC |          | 7.57E-02 | 2.24E-01 | 2.96E-09 |      | 1.51 | 1.34 | 4.13 |
| M38566mRNA_s_at         | O | T | 5 |  | 207.6  | 22.937  | OT | 7.57E-02 |          | 5.35E-01 | 3.62E-08 | 1.51 |      | 1.13 | 2.74 |
| M38566mRNA_s_at         | Y | C | 5 |  | 184.3  | 11.370  | YC | 2.24E-01 | 5.35E-01 |          | 1.51E-08 | 1.34 | 1.13 |      | 3.08 |
| M38566mRNA_s_at         | Y | T | 5 |  | 568.4  | 44.626  | YT | 2.96E-09 | 3.62E-08 | 1.51E-08 |          | 4.13 | 2.74 | 3.08 |      |
| M54926_at               | O | C | 5 |  | 1444.2 | 45.239  | OC |          | 4.37E-02 | 3.15E-02 | 3.24E-05 |      | 1.17 | 1.22 | 1.43 |
| M54926_at               | O | T | 5 |  | 1685.0 | 50.618  | OT | 4.37E-02 |          | 3.31E-04 | 2.85E-03 | 1.17 |      | 1.42 | 1.23 |
| M54926_at               | Y | C | 5 |  | 1185.0 | 97.708  | YC | 3.15E-02 | 3.31E-04 |          | 5.00E-07 | 1.22 | 1.42 |      | 1.75 |
| M54926_at               | Y | T | 5 |  | 2071.9 | 100.183 | YT | 3.24E-05 | 2.85E-03 | 5.00E-07 |          | 1.43 | 1.23 | 1.75 |      |
| M91597_s_at             | O | C | 5 |  | 3021.6 | 106.301 | OC |          | 1.63E-02 | 1.10E-01 | 1.30E-07 |      | 1.13 | 1.08 | 1.64 |
| M91597_s_at             | O | T | 5 |  | 2667.1 | 121.421 | OT | 1.63E-02 |          | 3.35E-01 | 1.18E-05 | 1.13 |      | 1.05 | 1.45 |
| M91597_s_at             | Y | C | 5 |  | 2798.4 | 77.428  | YC | 1.10E-01 | 3.35E-01 |          | 1.99E-06 | 1.08 | 1.05 |      | 1.52 |
| M91597_s_at             | Y | T | 5 |  | 1843.0 | 53.194  | YT | 1.30E-07 | 1.18E-05 | 1.99E-06 |          | 1.64 | 1.45 | 1.52 |      |
| M91652complete_seq_at   | O | C | 5 |  | 467.6  | 50.025  | OC |          | 1.77E-03 | 5.19E-01 | 6.58E-08 |      | 1.95 | 1.17 | 3.39 |
| M91652complete_seq_at   | O | T | 5 |  | 914.0  | 24.994  | OT | 1.77E-03 |          | 7.13E-03 | 3.66E-05 | 1.95 |      | 1.67 | 1.74 |
| M91652complete_seq_at   | Y | C | 5 |  | 546.4  | 52.473  | YC | 5.19E-01 | 7.13E-03 |          | 1.76E-07 | 1.17 | 1.67 |      | 2.90 |
| M91652complete_seq_at   | Y | T | 5 |  | 1587.1 | 150.211 | YT | 6.58E-08 | 3.66E-05 | 1.76E-07 |          | 3.39 | 1.74 | 2.90 |      |
| M91652complete_seq_g_at | O | C | 5 |  | 805.1  | 84.827  | OC |          | 1.52E-04 | 7.65E-01 | 6.97E-09 |      | 1.88 | 1.06 | 2.97 |
| M91652complete_seq_g_at | O | T | 5 |  | 1512.6 | 92.195  | OT | 1.52E-04 |          | 8.26E-05 | 1.54E-05 | 1.88 |      | 1.99 | 1.58 |
| M91652complete_seq_g_at | Y | C | 5 |  | 761.5  | 44.475  | YC | 7.65E-01 | 8.26E-05 |          | 4.73E-09 | 1.06 | 1.99 |      | 3.14 |
| M91652complete_seq_g_at | Y | T | 5 |  | 2388.3 | 153.575 | YT | 6.97E-09 | 1.54E-05 | 4.73E-09 |          | 2.97 | 1.58 | 3.14 |      |
| R46953_f_at             | O | C | 5 |  | 267.3  | 10.531  | OC |          | 8.45E-01 | 6.48E-08 | 8.48E-02 |      | 1.07 | 4.17 | 1.62 |
| R46953_f_at             | O | T | 5 |  | 285.2  | 42.687  | OT | 8.45E-01 |          | 8.67E-08 | 1.21E-01 | 1.07 |      | 3.91 | 1.52 |
| R46953_f_at             | Y | C | 5 |  | 1114.7 | 113.775 | YC | 6.48E-08 | 8.67E-08 |          | 1.15E-06 | 4.17 | 3.91 |      | 2.57 |
| R46953_f_at             | Y | T | 5 |  | 433.0  | 37.256  | YT | 8.48E-02 | 1.21E-01 | 1.15E-06 |          | 1.62 | 1.52 | 2.57 |      |
| R47128_f_at             | O | C | 5 |  | 134.1  | 17.005  | OC |          | 7.34E-01 | 7.19E-09 | 1.89E-03 |      | 1.17 | 6.38 | 2.81 |
| R47128_f_at             | O | T | 5 |  | 156.7  | 29.047  | OT | 7.34E-01 |          | 1.13E-08 | 3.93E-03 | 1.17 |      | 5.46 | 2.41 |
| R47128_f_at             | Y | C | 5 |  | 855.0  | 53.794  | YC | 7.19E-09 | 1.13E-08 |          | 1.82E-06 | 6.38 | 5.46 |      | 2.27 |
| R47128_f_at             | Y | T | 5 |  | 377.4  | 67.561  | YT | 1.89E-03 | 3.93E-03 | 1.82E-06 |          | 2.81 | 2.41 | 2.27 |      |
| R47150_f_at             | O | C | 5 |  | 179.3  | 14.394  | OC |          | 8.31E-01 | 9.74E-08 | 1.42E-01 |      | 1.08 | 4.23 | 1.55 |
| R47150_f_at             | O | T | 5 |  | 165.5  | 9.407   | OT | 8.31E-01 |          | 7.07E-08 | 9.74E-02 | 1.08 |      | 4.59 | 1.68 |
| R47150_f_at             | Y | C | 5 |  | 758.9  | 68.667  | YC | 9.74E-08 | 7.07E-08 |          | 1.11E-06 | 4.23 | 4.59 |      | 2.74 |
| R47150_f_at             | Y | T | 5 |  | 277.4  | 55.389  | YT | 1.42E-01 | 9.74E-02 | 1.11E-06 |          | 1.55 | 1.68 | 2.74 |      |
| rc_AA799479_g_at        | O | C | 5 |  | 1070.9 | 21.159  | OC |          | 4.29E-04 | 1.48E-05 | 3.29E-05 |      | 1.46 | 1.44 | 1.68 |
| rc_AA799479_g_at        | O | T | 5 |  | 734.0  | 33.031  | OT | 4.29E-04 |          | 1.32E-08 | 2.19E-01 | 1.46 |      | 2.09 | 1.15 |
| rc_AA799479_g_at        | Y | C | 5 |  | 1537.4 | 98.419  | YC | 1.48E-05 | 1.32E-08 |          | 2.57E-09 | 1.44 | 2.09 |      | 2.42 |
| rc_AA799479_g_at        | Y | T | 5 |  | 636.5  | 19.941  | YT | 3.29E-05 | 2.19E-01 | 2.57E-09 |          | 1.68 | 1.15 | 2.42 |      |

|                  |   |   |   |  |        |        |    |          |          |          |          |      |      |      |      |
|------------------|---|---|---|--|--------|--------|----|----------|----------|----------|----------|------|------|------|------|
| rc_AA799518_at   | O | C | 5 |  | 245.9  | 5.453  | OC |          | 2.38E-05 | 1.18E-05 | 9.51E-06 |      | 1.90 | 1.50 | 2.06 |
| rc_AA799518_at   | O | T | 5 |  | 129.3  | 7.557  | OT | 2.38E-05 |          | 1.81E-09 | 6.31E-01 | 1.90 |      | 2.86 | 1.08 |
| rc_AA799518_at   | Y | C | 5 |  | 370.0  | 25.500 | YC | 1.18E-05 | 1.81E-09 |          | 1.01E-09 | 1.50 | 2.86 |      | 3.09 |
| rc_AA799518_at   | Y | T | 5 |  | 119.6  | 7.303  | YT | 9.51E-06 | 6.31E-01 | 1.01E-09 |          | 2.06 | 1.08 | 3.09 |      |
| rc_AA799518_g_at | O | C | 5 |  | 666.9  | 24.526 | OC |          | 3.61E-05 | 1.65E-05 | 1.25E-05 |      | 2.05 | 1.55 | 2.29 |
| rc_AA799518_g_at | O | T | 5 |  | 325.4  | 31.626 | OT | 3.61E-05 |          | 2.92E-09 | 5.85E-01 | 2.05 |      | 3.18 | 1.12 |
| rc_AA799518_g_at | Y | C | 5 |  | 1033.4 | 74.769 | YC | 1.65E-05 | 2.92E-09 |          | 1.49E-09 | 1.55 | 3.18 |      | 3.54 |
| rc_AA799518_g_at | Y | T | 5 |  | 291.7  | 10.633 | YT | 1.25E-05 | 5.85E-01 | 1.49E-09 |          | 2.29 | 1.12 | 3.54 |      |
| rc_AA799539_at   | O | C | 5 |  | 69.2   | 4.697  | OC |          | 3.18E-02 | 7.28E-04 | 3.46E-09 |      | 1.23 | 1.40 | 2.12 |
| rc_AA799539_at   | O | T | 5 |  | 84.9   | 4.029  | OT | 3.18E-02 |          | 8.85E-02 | 8.35E-08 | 1.23 |      | 1.14 | 1.73 |
| rc_AA799539_at   | Y | C | 5 |  | 97.0   | 3.469  | YC | 7.28E-04 | 8.85E-02 |          | 1.48E-06 | 1.40 | 1.14 |      | 1.51 |
| rc_AA799539_at   | Y | T | 5 |  | 146.5  | 6.243  | YT | 3.46E-09 | 8.35E-08 | 1.48E-06 |          | 2.12 | 1.73 | 1.51 |      |
| rc_AA799645_at   | O | C | 5 |  | 2137.8 | 82.027 | OC |          | 4.16E-06 | 5.35E-06 | 1.72E-08 |      | 1.48 | 1.32 | 1.96 |
| rc_AA799645_at   | O | T | 5 |  | 1449.3 | 38.847 | OT | 4.16E-06 |          | 3.72E-10 | 2.80E-03 | 1.48 |      | 1.94 | 1.33 |
| rc_AA799645_at   | Y | C | 5 |  | 2812.2 | 83.250 | YC | 5.35E-06 | 3.72E-10 |          | 1.14E-11 | 1.32 | 1.94 |      | 2.57 |
| rc_AA799645_at   | Y | T | 5 |  | 1092.8 | 72.488 | YT | 1.72E-08 | 2.80E-03 | 1.14E-11 |          | 1.96 | 1.33 | 2.57 |      |
| rc_AA799645_g_at | O | C | 5 |  | 966.8  | 56.974 | OC |          | 7.01E-06 | 1.46E-05 | 5.04E-07 |      | 1.73 | 1.40 | 2.10 |
| rc_AA799645_g_at | O | T | 5 |  | 557.5  | 37.938 | OT | 7.01E-06 |          | 9.52E-10 | 1.44E-01 | 1.73 |      | 2.42 | 1.21 |
| rc_AA799645_g_at | Y | C | 5 |  | 1351.2 | 53.429 | YC | 1.46E-05 | 9.52E-10 |          | 1.76E-10 | 1.40 | 2.42 |      | 2.93 |
| rc_AA799645_g_at | Y | T | 5 |  | 461.2  | 18.203 | YT | 5.04E-07 | 1.44E-01 | 1.76E-10 |          | 2.10 | 1.21 | 2.93 |      |
| rc_AA799766_at   | O | C | 5 |  | 241.6  | 11.132 | OC |          | 5.02E-01 | 3.59E-06 | 1.13E-01 |      | 1.04 | 1.38 | 1.09 |
| rc_AA799766_at   | O | T | 5 |  | 250.7  | 9.147  | OT | 5.02E-01 |          | 1.25E-05 | 3.37E-01 | 1.04 |      | 1.33 | 1.05 |
| rc_AA799766_at   | Y | C | 5 |  | 333.0  | 10.063 | YC | 3.59E-06 | 1.25E-05 |          | 8.40E-05 | 1.38 | 1.33 |      | 1.26 |
| rc_AA799766_at   | Y | T | 5 |  | 263.8  | 6.549  | YT | 1.13E-01 | 3.37E-01 | 8.40E-05 |          | 1.09 | 1.05 | 1.26 |      |
| rc_AA800221_at   | O | C | 5 |  | 2113.9 | 77.263 | OC |          | 1.89E-05 | 7.43E-01 | 1.41E-08 |      | 1.37 | 1.01 | 1.89 |
| rc_AA800221_at   | O | T | 5 |  | 1546.9 | 76.168 | OT | 1.89E-05 |          | 1.01E-05 | 3.64E-04 | 1.37 |      | 1.39 | 1.38 |
| rc_AA800221_at   | Y | C | 5 |  | 2145.5 | 51.490 | YC | 7.43E-01 | 1.01E-05 |          | 9.05E-09 | 1.01 | 1.39 |      | 1.91 |
| rc_AA800221_at   | Y | T | 5 |  | 1120.9 | 59.191 | YT | 1.41E-08 | 3.64E-04 | 9.05E-09 |          | 1.89 | 1.38 | 1.91 |      |
| rc_AA800298_at   | O | C | 5 |  | 53.7   | 2.307  | OC |          | 8.80E-01 | 9.02E-07 | 1.03E-02 |      | 1.03 | 2.42 | 1.53 |
| rc_AA800298_at   | O | T | 5 |  | 52.2   | 6.321  | OT | 8.80E-01 |          | 7.00E-07 | 7.44E-03 | 1.03 |      | 2.49 | 1.58 |
| rc_AA800298_at   | Y | C | 5 |  | 129.7  | 11.996 | YC | 9.02E-07 | 7.00E-07 |          | 1.98E-04 | 2.42 | 2.49 |      | 1.57 |
| rc_AA800298_at   | Y | T | 5 |  | 82.4   | 2.360  | YT | 1.03E-02 | 7.44E-03 | 1.98E-04 |          | 1.53 | 1.58 | 1.57 |      |
| rc_AA800686_at   | O | C | 5 |  | 288.1  | 12.705 | OC |          | 2.54E-02 | 2.67E-09 | 1.80E-03 |      | 1.18 | 1.86 | 1.27 |
| rc_AA800686_at   | O | T | 5 |  | 339.8  | 11.301 | OT | 2.54E-02 |          | 7.22E-08 | 2.22E-01 | 1.18 |      | 1.58 | 1.08 |
| rc_AA800686_at   | Y | C | 5 |  | 535.3  | 19.722 | YC | 2.67E-09 | 7.22E-08 |          | 5.11E-07 | 1.86 | 1.58 |      | 1.46 |
| rc_AA800686_at   | Y | T | 5 |  | 366.4  | 14.187 | YT | 1.80E-03 | 2.22E-01 | 5.11E-07 |          | 1.27 | 1.08 | 1.46 |      |
| rc_AA817861_at   | O | C | 5 |  | 154.9  | 4.760  | OC |          | 8.00E-04 | 3.00E-04 | 3.07E-04 |      | 1.34 | 1.28 | 1.39 |
| rc_AA817861_at   | O | T | 5 |  | 115.8  | 1.963  | OT | 8.00E-04 |          | 1.80E-07 | 6.51E-01 | 1.34 |      | 1.71 | 1.04 |
| rc_AA817861_at   | Y | C | 5 |  | 198.4  | 10.298 | YC | 3.00E-04 | 1.80E-07 |          | 8.99E-08 | 1.28 | 1.71 |      | 1.78 |
| rc_AA817861_at   | Y | T | 5 |  | 111.5  | 6.846  | YT | 3.07E-04 | 6.51E-01 | 8.99E-08 |          | 1.39 | 1.04 | 1.78 |      |
| rc_AA818123_at   | O | C | 5 |  | 257.5  | 12.297 | OC |          | 5.96E-03 | 7.93E-01 | 1.85E-07 |      | 1.29 | 1.03 | 1.80 |
| rc_AA818123_at   | O | T | 5 |  | 332.4  | 12.630 | OT | 5.96E-03 |          | 3.40E-03 | 4.60E-05 | 1.29 |      | 1.32 | 1.39 |
| rc_AA818123_at   | Y | C | 5 |  | 251.2  | 11.121 | YC | 7.93E-01 | 3.40E-03 |          | 1.23E-07 | 1.03 | 1.32 |      | 1.84 |
| rc_AA818123_at   | Y | T | 5 |  | 463.2  | 26.167 | YT | 1.85E-07 | 4.60E-05 | 1.23E-07 |          | 1.80 | 1.39 | 1.84 |      |
| rc_AA818271_at   | O | C | 5 |  | 109.8  | 5.197  | OC |          | 7.87E-10 | 1.39E-01 | 1.23E-13 |      | 2.39 | 1.20 | 3.48 |

|                  |   |   |   |  |        |         |    |          |          |          |          |      |      |      |      |
|------------------|---|---|---|--|--------|---------|----|----------|----------|----------|----------|------|------|------|------|
| rc_AA818271_at   | O | T | 5 |  | 262.8  | 10.023  | OT | 7.87E-10 |          | 1.44E-10 | 2.67E-08 | 2.39 |      | 2.88 | 1.46 |
| rc_AA818271_at   | Y | C | 5 |  | 91.2   | 6.033   | YC | 1.39E-01 | 1.44E-10 |          | 4.39E-14 | 1.20 | 2.88 |      | 4.19 |
| rc_AA818271_at   | Y | T | 5 |  | 382.3  | 11.001  | YT | 1.23E-13 | 2.67E-08 | 4.39E-14 |          | 3.48 | 1.46 | 4.19 |      |
| rc_AA818639_at   | O | C | 5 |  | 352.2  | 12.401  | OC |          | 2.62E-04 | 2.08E-05 | 1.25E-03 |      | 1.43 | 1.39 | 1.34 |
| rc_AA818639_at   | O | T | 5 |  | 245.7  | 5.588   | OT | 2.62E-04 |          | 1.21E-08 | 4.65E-01 | 1.43 |      | 1.99 | 1.07 |
| rc_AA818639_at   | Y | C | 5 |  | 487.9  | 25.364  | YC | 2.08E-05 | 1.21E-08 |          | 3.39E-08 | 1.39 | 1.99 |      | 1.86 |
| rc_AA818639_at   | Y | T | 5 |  | 262.8  | 14.699  | YT | 1.25E-03 | 4.65E-01 | 3.39E-08 |          | 1.34 | 1.07 | 1.86 |      |
| rc_AA818804_at   | O | C | 5 |  | 747.7  | 51.190  | OC |          | 1.23E-03 | 3.40E-01 | 2.79E-08 |      | 1.47 | 1.13 | 2.20 |
| rc_AA818804_at   | O | T | 5 |  | 1100.5 | 46.485  | OT | 1.23E-03 |          | 1.61E-04 | 1.61E-05 | 1.47 |      | 1.67 | 1.50 |
| rc_AA818804_at   | Y | C | 5 |  | 659.2  | 54.876  | YC | 3.40E-01 | 1.61E-04 |          | 7.44E-09 | 1.13 | 1.67 |      | 2.50 |
| rc_AA818804_at   | Y | T | 5 |  | 1647.6 | 91.849  | YT | 2.79E-08 | 1.61E-05 | 7.44E-09 |          | 2.20 | 1.50 | 2.50 |      |
| rc_AA818952_at   | O | C | 5 |  | 3662.0 | 113.715 | OC |          | 1.07E-04 | 1.21E-01 | 2.21E-07 |      | 1.41 | 1.15 | 1.69 |
| rc_AA818952_at   | O | T | 5 |  | 5171.3 | 279.734 | OT | 1.07E-04 |          | 4.78E-06 | 3.10E-03 | 1.41 |      | 1.63 | 1.20 |
| rc_AA818952_at   | Y | C | 5 |  | 3178.0 | 162.894 | YC | 1.21E-01 | 4.78E-06 |          | 2.04E-08 | 1.15 | 1.63 |      | 1.95 |
| rc_AA818952_at   | Y | T | 5 |  | 6200.8 | 239.591 | YT | 2.21E-07 | 3.10E-03 | 2.04E-08 |          | 1.69 | 1.20 | 1.95 |      |
| rc_AA818971_at   | O | C | 5 |  | 2015.5 | 107.108 | OC |          | 2.48E-02 | 8.09E-03 | 2.89E-04 |      | 1.22 | 1.22 | 1.51 |
| rc_AA818971_at   | O | T | 5 |  | 1648.4 | 140.857 | OT | 2.48E-02 |          | 4.86E-05 | 4.86E-02 | 1.22 |      | 1.49 | 1.24 |
| rc_AA818971_at   | Y | C | 5 |  | 2463.7 | 42.631  | YC | 8.09E-03 | 4.86E-05 |          | 1.01E-06 | 1.22 | 1.49 |      | 1.85 |
| rc_AA818971_at   | Y | T | 5 |  | 1331.9 | 104.155 | YT | 2.89E-04 | 4.86E-02 | 1.01E-06 |          | 1.51 | 1.24 | 1.85 |      |
| rc_AA819207_at   | O | C | 5 |  | 1348.3 | 171.113 | OC |          | 6.51E-01 | 7.94E-10 | 1.31E-04 |      | 1.22 | 5.95 | 2.93 |
| rc_AA819207_at   | O | T | 5 |  | 1108.2 | 199.762 | OT | 6.51E-01 |          | 4.72E-10 | 5.24E-05 | 1.22 |      | 7.24 | 3.57 |
| rc_AA819207_at   | Y | C | 5 |  | 8025.4 | 486.354 | YC | 7.94E-10 | 4.72E-10 |          | 7.54E-07 | 5.95 | 7.24 |      | 2.03 |
| rc_AA819207_at   | Y | T | 5 |  | 3953.9 | 487.448 | YT | 1.31E-04 | 5.24E-05 | 7.54E-07 |          | 2.93 | 3.57 | 2.03 |      |
| rc_AA819398_at   | O | C | 5 |  | 434.3  | 20.554  | OC |          | 1.69E-02 | 7.15E-05 | 2.69E-03 |      | 1.20 | 1.33 | 1.28 |
| rc_AA819398_at   | O | T | 5 |  | 363.2  | 13.551  | OT | 1.69E-02 |          | 5.84E-07 | 3.92E-01 | 1.20 |      | 1.59 | 1.07 |
| rc_AA819398_at   | Y | C | 5 |  | 575.8  | 25.620  | YC | 7.15E-05 | 5.84E-07 |          | 1.47E-07 | 1.33 | 1.59 |      | 1.69 |
| rc_AA819398_at   | Y | T | 5 |  | 339.8  | 12.657  | YT | 2.69E-03 | 3.92E-01 | 1.47E-07 |          | 1.28 | 1.07 | 1.69 |      |
| rc_AA819709_at   | O | C | 5 |  | 962.4  | 52.742  | OC |          | 6.40E-03 | 9.65E-05 | 1.17E-02 |      | 1.21 | 1.52 | 1.19 |
| rc_AA819709_at   | O | T | 5 |  | 1163.8 | 55.908  | OT | 6.40E-03 |          | 3.51E-07 | 7.76E-01 | 1.21 |      | 1.84 | 1.02 |
| rc_AA819709_at   | Y | C | 5 |  | 631.3  | 23.832  | YC | 9.65E-05 | 3.51E-07 |          | 5.58E-07 | 1.52 | 1.84 |      | 1.81 |
| rc_AA819709_at   | Y | T | 5 |  | 1145.2 | 42.237  | YT | 1.17E-02 | 7.76E-01 | 5.58E-07 |          | 1.19 | 1.02 | 1.81 |      |
| rc_AA849769_g_at | O | C | 5 |  | 462.3  | 18.046  | OC |          | 4.11E-02 | 1.78E-05 | 1.01E-01 |      | 1.48 | 1.88 | 1.34 |
| rc_AA849769_g_at | O | T | 5 |  | 312.0  | 25.201  | OT | 4.11E-02 |          | 3.77E-07 | 6.37E-01 | 1.48 |      | 2.79 | 1.10 |
| rc_AA849769_g_at | Y | C | 5 |  | 869.5  | 76.332  | YC | 1.78E-05 | 3.77E-07 |          | 8.21E-07 | 1.88 | 2.79 |      | 2.52 |
| rc_AA849769_g_at | Y | T | 5 |  | 344.5  | 48.661  | YT | 1.01E-01 | 6.37E-01 | 8.21E-07 |          | 1.34 | 1.10 | 2.52 |      |
| rc_AA851403_g_at | O | C | 5 |  | 3202.9 | 122.242 | OC |          | 2.54E-03 | 2.22E-02 | 1.74E-05 |      | 1.33 | 1.18 | 1.72 |
| rc_AA851403_g_at | O | T | 5 |  | 2407.0 | 135.196 | OT | 2.54E-03 |          | 1.52E-05 | 2.56E-02 | 1.33 |      | 1.56 | 1.29 |
| rc_AA851403_g_at | Y | C | 5 |  | 3766.8 | 248.990 | YC | 2.22E-02 | 1.52E-05 |          | 2.26E-07 | 1.18 | 1.56 |      | 2.03 |
| rc_AA851403_g_at | Y | T | 5 |  | 1858.8 | 63.344  | YT | 1.74E-05 | 2.56E-02 | 2.26E-07 |          | 1.72 | 1.29 | 2.03 |      |
| rc_AA852004_s_at | O | C | 5 |  | 206.7  | 13.634  | OC |          | 4.66E-03 | 8.00E-01 | 2.46E-07 |      | 2.11 | 1.09 | 3.86 |
| rc_AA852004_s_at | O | T | 5 |  | 435.3  | 21.764  | OT | 4.66E-03 |          | 2.71E-03 | 8.31E-05 | 2.11 |      | 2.31 | 1.84 |
| rc_AA852004_s_at | Y | C | 5 |  | 188.8  | 27.293  | YC | 8.00E-01 | 2.71E-03 |          | 1.65E-07 | 1.09 | 2.31 |      | 4.23 |
| rc_AA852004_s_at | Y | T | 5 |  | 798.8  | 90.958  | YT | 2.46E-07 | 8.31E-05 | 1.65E-07 |          | 3.86 | 1.84 | 4.23 |      |
| rc_AA858817_at   | O | C | 5 |  | 343.3  | 32.885  | OC |          | 2.29E-01 | 8.51E-01 | 1.02E-06 |      | 1.88 | 1.13 | 6.36 |
| rc_AA858817_at   | O | T | 5 |  | 644.6  | 136.752 | OT | 2.29E-01 |          | 3.05E-01 | 9.14E-06 | 1.88 |      | 1.66 | 3.39 |

|                  |   |   |   |  |        |         |    |          |          |          |          |       |      |      |       |
|------------------|---|---|---|--|--------|---------|----|----------|----------|----------|----------|-------|------|------|-------|
| rc_AA858817_at   | Y | C | 5 |  | 389.3  | 27.961  | YC | 8.51E-01 | 3.05E-01 |          | 1.41E-06 | 1.13  | 1.66 |      | 5.61  |
| rc_AA858817_at   | Y | T | 5 |  | 2182.6 | 309.356 | YT | 1.02E-06 | 9.14E-06 | 1.41E-06 |          | 6.36  | 3.39 | 5.61 |       |
| rc_AA858875_at   | O | C | 5 |  | 761.2  | 44.866  | OC |          | 1.81E-01 | 3.28E-08 | 6.50E-03 |       | 1.24 | 2.39 | 1.78  |
| rc_AA858875_at   | O | T | 5 |  | 611.7  | 93.978  | OT | 1.81E-01 |          | 5.06E-09 | 1.03E-01 | 1.24  |      | 2.97 | 1.43  |
| rc_AA858875_at   | Y | C | 5 |  | 1816.6 | 108.492 | YC | 3.28E-08 | 5.06E-09 |          | 6.39E-10 | 2.39  | 2.97 |      | 4.25  |
| rc_AA858875_at   | Y | T | 5 |  | 427.0  | 15.299  | YT | 6.50E-03 | 1.03E-01 | 6.39E-10 |          | 1.78  | 1.43 | 4.25 |       |
| rc_AA859284_at   | O | C | 5 |  | 432.6  | 51.265  | OC |          | 8.72E-01 | 3.99E-10 | 1.59E-03 |       | 1.12 | 9.50 | 3.40  |
| rc_AA859284_at   | O | T | 5 |  | 387.6  | 75.696  | OT | 8.72E-01 |          | 3.34E-10 | 1.12E-03 | 1.12  |      | ###  | 3.80  |
| rc_AA859284_at   | Y | C | 5 |  | 4109.3 | 309.114 | YC | 3.99E-10 | 3.34E-10 |          | 4.65E-08 | 9.50  | ###  |      | 2.79  |
| rc_AA859284_at   | Y | T | 5 |  | 1472.2 | 214.815 | YT | 1.59E-03 | 1.12E-03 | 4.65E-08 |          | 3.40  | 3.80 | 2.79 |       |
| rc_AA859325_at   | O | C | 5 |  | 777.6  | 26.958  | OC |          | 2.39E-04 | 3.31E-04 | 1.30E-05 |       | 1.32 | 1.24 | 1.47  |
| rc_AA859325_at   | O | T | 5 |  | 588.1  | 37.148  | OT | 2.39E-04 |          | 8.06E-08 | 1.57E-01 | 1.32  |      | 1.63 | 1.11  |
| rc_AA859325_at   | Y | C | 5 |  | 960.7  | 13.528  | YC | 3.31E-04 | 8.06E-08 |          | 1.02E-08 | 1.24  | 1.63 |      | 1.82  |
| rc_AA859325_at   | Y | T | 5 |  | 528.2  | 30.943  | YT | 1.30E-05 | 1.57E-01 | 1.02E-08 |          | 1.47  | 1.11 | 1.82 |       |
| rc_AA859352_at   | O | C | 5 |  | 227.6  | 18.566  | OC |          | 1.75E-07 | 6.34E-11 | 4.30E-07 |       | 2.45 | 2.03 | 2.24  |
| rc_AA859352_at   | O | T | 5 |  | 92.9   | 7.779   | OT | 1.75E-07 |          | 5.96E-14 | 5.74E-01 | 2.45  |      | 4.97 | 1.10  |
| rc_AA859352_at   | Y | C | 5 |  | 461.7  | 5.009   | YC | 6.34E-11 | 5.96E-14 |          | 8.72E-14 | 2.03  | 4.97 |      | 4.54  |
| rc_AA859352_at   | Y | T | 5 |  | 101.8  | 6.719   | YT | 4.30E-07 | 5.74E-01 | 8.72E-14 |          | 2.24  | 1.10 | 4.54 |       |
| rc_AA859444_at   | O | C | 5 |  | 199.0  | 23.947  | OC |          | 1.17E-01 | 1.36E-05 | 2.78E-01 |       | 1.27 | 1.79 | 1.17  |
| rc_AA859444_at   | O | T | 5 |  | 156.7  | 5.555   | OT | 1.17E-01 |          | 7.39E-07 | 5.99E-01 | 1.27  |      | 2.27 | 1.09  |
| rc_AA859444_at   | Y | C | 5 |  | 355.8  | 22.122  | YC | 1.36E-05 | 7.39E-07 |          | 1.82E-06 | 1.79  | 2.27 |      | 2.09  |
| rc_AA859444_at   | Y | T | 5 |  | 170.4  | 14.183  | YT | 2.78E-01 | 5.99E-01 | 1.82E-06 |          | 1.17  | 1.09 | 2.09 |       |
| rc_AA859519_g_at | O | C | 5 |  | 92.7   | 6.406   | OC |          | 1.02E-06 | 9.52E-02 | 1.06E-04 |       | 1.85 | 1.20 | 1.57  |
| rc_AA859519_g_at | O | T | 5 |  | 171.5  | 9.739   | OT | 1.02E-06 |          | 2.44E-05 | 2.27E-02 | 1.85  |      | 1.54 | 1.18  |
| rc_AA859519_g_at | Y | C | 5 |  | 111.1  | 7.458   | YC | 9.52E-02 | 2.44E-05 |          | 4.21E-03 | 1.20  | 1.54 |      | 1.31  |
| rc_AA859519_g_at | Y | T | 5 |  | 145.5  | 4.688   | YT | 1.06E-04 | 2.27E-02 | 4.21E-03 |          | 1.57  | 1.18 | 1.31 |       |
| rc_AA859885_at   | O | C | 5 |  | 293.0  | 14.812  | OC |          | 6.54E-02 | 3.72E-06 | 7.41E-02 |       | 1.28 | 1.77 | 1.27  |
| rc_AA859885_at   | O | T | 5 |  | 228.1  | 22.389  | OT | 6.54E-02 |          | 1.45E-07 | 9.47E-01 | 1.28  |      | 2.27 | 1.01  |
| rc_AA859885_at   | Y | C | 5 |  | 518.6  | 27.038  | YC | 3.72E-06 | 1.45E-07 |          | 1.60E-07 | 1.77  | 2.27 |      | 2.25  |
| rc_AA859885_at   | Y | T | 5 |  | 230.3  | 26.451  | YT | 7.41E-02 | 9.47E-01 | 1.60E-07 |          | 1.27  | 1.01 | 2.25 |       |
| rc_AA859942_at   | O | C | 5 |  | 262.8  | 3.140   | OC |          | 3.44E-02 | 1.24E-01 | 7.12E-05 |       | 1.17 | 1.14 | 1.39  |
| rc_AA859942_at   | O | T | 5 |  | 307.9  | 17.660  | OT | 3.44E-02 |          | 1.18E-03 | 8.62E-03 | 1.17  |      | 1.33 | 1.19  |
| rc_AA859942_at   | Y | C | 5 |  | 231.1  | 15.854  | YC | 1.24E-01 | 1.18E-03 |          | 3.40E-06 | 1.14  | 1.33 |      | 1.58  |
| rc_AA859942_at   | Y | T | 5 |  | 366.2  | 13.702  | YT | 7.12E-05 | 8.62E-03 | 3.40E-06 |          | 1.39  | 1.19 | 1.58 |       |
| rc_AA866452_s_at | O | C | 5 |  | 2951.1 | 283.997 | OC |          | 1.56E-09 | 6.51E-07 | 9.55E-10 |       | 9.55 | 2.37 | 13.51 |
| rc_AA866452_s_at | O | T | 5 |  | 309.0  | 54.631  | OT | 1.56E-09 |          | 5.18E-04 | 6.81E-01 | 9.55  |      | 4.03 | 1.41  |
| rc_AA866452_s_at | Y | C | 5 |  | 1244.3 | 95.110  | YC | 6.51E-07 | 5.18E-04 |          | 2.18E-04 | 2.37  | 4.03 |      | 5.69  |
| rc_AA866452_s_at | Y | T | 5 |  | 218.5  | 25.522  | YT | 9.55E-10 | 6.81E-01 | 2.18E-04 |          | 13.51 | 1.41 | 5.69 |       |
| rc_AA866477_at   | O | C | 5 |  | 1734.7 | 123.517 | OC |          | 1.53E-01 | 2.31E-03 | 3.73E-03 |       | 1.15 | 1.32 | 1.43  |
| rc_AA866477_at   | O | T | 5 |  | 1503.7 | 92.301  | OT | 1.53E-01 |          | 1.03E-04 | 7.71E-02 | 1.15  |      | 1.52 | 1.24  |
| rc_AA866477_at   | Y | C | 5 |  | 2291.2 | 149.110 | YC | 2.31E-03 | 1.03E-04 |          | 2.96E-06 | 1.32  | 1.52 |      | 1.89  |
| rc_AA866477_at   | Y | T | 5 |  | 1213.0 | 36.490  | YT | 3.73E-03 | 7.71E-02 | 2.96E-06 |          | 1.43  | 1.24 | 1.89 |       |
| rc_AA874803_g_at | O | C | 5 |  | 231.1  | 20.306  | OC |          | 8.04E-01 | 5.35E-01 | 6.40E-08 |       | 1.04 | 1.10 | 2.50  |
| rc_AA874803_g_at | O | T | 5 |  | 240.3  | 13.994  | OT | 8.04E-01 |          | 7.08E-01 | 9.27E-08 | 1.04  |      | 1.06 | 2.40  |
| rc_AA874803_g_at | Y | C | 5 |  | 254.4  | 11.703  | YC | 5.35E-01 | 7.08E-01 |          | 1.65E-07 | 1.10  | 1.06 |      | 2.27  |



|                  |   |   |   |  |        |         |    |          |          |          |          |      |      |      |      |
|------------------|---|---|---|--|--------|---------|----|----------|----------|----------|----------|------|------|------|------|
| rc_AA874803_g_at | Y | T | 5 |  | 576.9  | 44.262  | YT | 6.40E-08 | 9.27E-08 | 1.65E-07 |          | 2.50 | 2.40 | 2.27 |      |
| rc_AA875032_at   | O | C | 5 |  | 86.7   | 7.766   | OC |          | 2.20E-01 | 2.50E-02 | 2.51E-04 |      | 1.13 | 1.34 | 1.48 |
| rc_AA875032_at   | O | T | 5 |  | 98.2   | 6.550   | OT | 2.20E-01 |          | 1.75E-03 | 3.63E-03 | 1.13 |      | 1.52 | 1.31 |
| rc_AA875032_at   | Y | C | 5 |  | 64.5   | 3.669   | YC | 2.50E-02 | 1.75E-03 |          | 2.29E-06 | 1.34 | 1.52 |      | 1.99 |
| rc_AA875032_at   | Y | T | 5 |  | 128.7  | 6.642   | YT | 2.51E-04 | 3.63E-03 | 2.29E-06 |          | 1.48 | 1.31 | 1.99 |      |
| rc_AA875084_at   | O | C | 5 |  | 79.3   | 9.492   | OC |          | 1.08E-01 | 6.58E-01 | 5.77E-06 |      | 1.68 | 1.22 | 3.66 |
| rc_AA875084_at   | O | T | 5 |  | 133.4  | 12.570  | OT | 1.08E-01 |          | 4.70E-02 | 1.51E-04 | 1.68 |      | 2.06 | 2.18 |
| rc_AA875084_at   | Y | C | 5 |  | 64.9   | 5.372   | YC | 6.58E-01 | 4.70E-02 |          | 2.60E-06 | 1.22 | 2.06 |      | 4.47 |
| rc_AA875084_at   | Y | T | 5 |  | 290.3  | 41.827  | YT | 5.77E-06 | 1.51E-04 | 2.60E-06 |          | 3.66 | 2.18 | 4.47 |      |
| rc_AA875531_s_at | O | C | 5 |  | 470.4  | 36.905  | OC |          | 8.94E-01 | 4.16E-09 | 1.56E-03 |      | 1.08 | 7.41 | 3.13 |
| rc_AA875531_s_at | O | T | 5 |  | 434.9  | 71.595  | OT | 8.94E-01 |          | 3.52E-09 | 1.17E-03 | 1.08 |      | 8.01 | 3.39 |
| rc_AA875531_s_at | Y | C | 5 |  | 3483.6 | 328.341 | YC | 4.16E-09 | 3.52E-09 |          | 1.03E-06 | 7.41 | 8.01 |      | 2.36 |
| rc_AA875531_s_at | Y | T | 5 |  | 1473.7 | 157.369 | YT | 1.56E-03 | 1.17E-03 | 1.03E-06 |          | 3.13 | 3.39 | 2.36 |      |
| rc_AA891314_at   | O | C | 5 |  | 584.0  | 22.062  | OC |          | 3.42E-02 | 1.01E-04 | 4.55E-02 |      | 1.28 | 1.48 | 1.25 |
| rc_AA891314_at   | O | T | 5 |  | 457.6  | 15.562  | OT | 3.42E-02 |          | 1.39E-06 | 8.85E-01 | 1.28 |      | 1.89 | 1.02 |
| rc_AA891314_at   | Y | C | 5 |  | 864.0  | 69.297  | YC | 1.01E-04 | 1.39E-06 |          | 1.79E-06 | 1.48 | 1.89 |      | 1.86 |
| rc_AA891314_at   | Y | T | 5 |  | 465.6  | 20.731  | YT | 4.55E-02 | 8.85E-01 | 1.79E-06 |          | 1.25 | 1.02 | 1.86 |      |
| rc_AA891790_at   | O | C | 5 |  | 71.3   | 3.318   | OC |          | 2.85E-03 | 7.95E-02 | 2.99E-08 |      | 1.44 | 1.23 | 2.24 |
| rc_AA891790_at   | O | T | 5 |  | 102.5  | 6.089   | OT | 2.85E-03 |          | 1.19E-01 | 8.45E-06 | 1.44 |      | 1.17 | 1.56 |
| rc_AA891790_at   | Y | C | 5 |  | 87.9   | 9.203   | YC | 7.95E-02 | 1.19E-01 |          | 4.98E-07 | 1.23 | 1.17 |      | 1.81 |
| rc_AA891790_at   | Y | T | 5 |  | 159.5  | 4.970   | YT | 2.99E-08 | 8.45E-06 | 4.98E-07 |          | 2.24 | 1.56 | 1.81 |      |
| rc_AA892234_at   | O | C | 5 |  | 2618.0 | 147.643 | OC |          | 1.42E-03 | 9.55E-04 | 3.94E-05 |      | 1.58 | 1.39 | 2.16 |
| rc_AA892234_at   | O | T | 5 |  | 1651.8 | 184.959 | OT | 1.42E-03 |          | 6.68E-07 | 9.80E-02 | 1.58 |      | 2.20 | 1.36 |
| rc_AA892234_at   | Y | C | 5 |  | 3631.4 | 235.672 | YC | 9.55E-04 | 6.68E-07 |          | 4.54E-08 | 1.39 | 2.20 |      | 3.00 |
| rc_AA892234_at   | Y | T | 5 |  | 1210.7 | 120.374 | YT | 3.94E-05 | 9.80E-02 | 4.54E-08 |          | 2.16 | 1.36 | 3.00 |      |
| rc_AA892314_at   | O | C | 5 |  | 126.1  | 12.960  | OC |          | 1.23E-01 | 5.59E-01 | 1.12E-05 |      | 1.30 | 1.12 | 2.15 |
| rc_AA892314_at   | O | T | 5 |  | 163.8  | 15.972  | OT | 1.23E-01 |          | 4.10E-02 | 2.70E-04 | 1.30 |      | 1.46 | 1.66 |
| rc_AA892314_at   | Y | C | 5 |  | 112.3  | 11.479  | YC | 5.59E-01 | 4.10E-02 |          | 3.79E-06 | 1.12 | 1.46 |      | 2.42 |
| rc_AA892314_at   | Y | T | 5 |  | 271.5  | 22.809  | YT | 1.12E-05 | 2.70E-04 | 3.79E-06 |          | 2.15 | 1.66 | 2.42 |      |
| rc_AA893185_at   | O | C | 5 |  | 1016.8 | 26.278  | OC |          | 1.78E-06 | 5.59E-07 | 4.90E-08 |      | 1.57 | 1.40 | 1.91 |
| rc_AA893185_at   | O | T | 5 |  | 647.2  | 24.359  | OT | 1.78E-06 |          | 5.70E-11 | 3.60E-02 | 1.57 |      | 2.20 | 1.22 |
| rc_AA893185_at   | Y | C | 5 |  | 1421.6 | 57.480  | YC | 5.59E-07 | 5.70E-11 |          | 6.89E-12 | 1.40 | 2.20 |      | 2.68 |
| rc_AA893185_at   | Y | T | 5 |  | 531.4  | 23.183  | YT | 4.90E-08 | 3.60E-02 | 6.89E-12 |          | 1.91 | 1.22 | 2.68 |      |
| rc_AA900199_s_at | O | C | 5 |  | 500.6  | 43.267  | OC |          | 6.97E-01 | 3.42E-05 | 1.44E-01 |      | 1.03 | 1.48 | 1.15 |
| rc_AA900199_s_at | O | T | 5 |  | 483.9  | 19.480  | OT | 6.97E-01 |          | 1.61E-05 | 2.71E-01 | 1.03 |      | 1.53 | 1.11 |
| rc_AA900199_s_at | Y | C | 5 |  | 741.2  | 24.071  | YC | 3.42E-05 | 1.61E-05 |          | 2.06E-06 | 1.48 | 1.53 |      | 1.70 |
| rc_AA900199_s_at | Y | T | 5 |  | 435.6  | 27.500  | YT | 1.44E-01 | 2.71E-01 | 2.06E-06 |          | 1.15 | 1.11 | 1.70 |      |
| rc_AA924326_s_at | O | C | 5 |  | 5306.1 | 160.595 | OC |          | 4.69E-01 | 6.68E-03 | 1.42E-04 |      | 1.06 | 1.31 | 1.38 |
| rc_AA924326_s_at | O | T | 5 |  | 5607.0 | 178.300 | OT | 4.69E-01 |          | 1.40E-03 | 6.53E-04 | 1.06 |      | 1.39 | 1.31 |
| rc_AA924326_s_at | Y | C | 5 |  | 4042.8 | 74.103  | YC | 6.68E-03 | 1.40E-03 |          | 4.92E-07 | 1.31 | 1.39 |      | 1.81 |
| rc_AA924326_s_at | Y | T | 5 |  | 7318.2 | 515.846 | YT | 1.42E-04 | 6.53E-04 | 4.92E-07 |          | 1.38 | 1.31 | 1.81 |      |
| rc_AA946040_at   | O | C | 5 |  | 1187.1 | 63.384  | OC |          | 3.00E-02 | 8.80E-04 | 2.61E-05 |      | 1.15 | 1.22 | 1.46 |
| rc_AA946040_at   | O | T | 5 |  | 1034.8 | 22.235  | OT | 3.00E-02 |          | 7.91E-06 | 3.38E-03 | 1.15 |      | 1.40 | 1.27 |
| rc_AA946040_at   | Y | C | 5 |  | 1447.7 | 52.445  | YC | 8.80E-04 | 7.91E-06 |          | 3.18E-08 | 1.22 | 1.40 |      | 1.78 |
| rc_AA946040_at   | Y | T | 5 |  | 815.1  | 30.168  | YT | 2.61E-05 | 3.38E-03 | 3.18E-08 |          | 1.46 | 1.27 | 1.78 |      |

|                  |   |   |   |  |        |         |    |          |          |          |          |      |      |      |      |
|------------------|---|---|---|--|--------|---------|----|----------|----------|----------|----------|------|------|------|------|
| rc_AA946313_s_at | O | C | 5 |  | 177.5  | 9.449   | OC |          | 8.17E-01 | 3.68E-07 | 7.47E-03 |      | 1.13 | 5.56 | 2.69 |
| rc_AA946313_s_at | O | T | 5 |  | 200.5  | 19.825  | OT | 8.17E-01 |          | 5.37E-07 | 1.22E-02 | 1.13 |      | 4.92 | 2.38 |
| rc_AA946313_s_at | Y | C | 5 |  | 986.2  | 135.012 | YC | 3.68E-07 | 5.37E-07 |          | 8.86E-05 | 5.56 | 4.92 |      | 2.07 |
| rc_AA946313_s_at | Y | T | 5 |  | 477.4  | 21.976  | YT | 7.47E-03 | 1.22E-02 | 8.86E-05 |          | 2.69 | 2.38 | 2.07 |      |
| rc_AA963839_s_at | O | C | 5 |  | 300.1  | 14.734  | OC |          | 1.45E-05 | 1.89E-02 | 1.44E-01 |      | 1.53 | 1.29 | 1.15 |
| rc_AA963839_s_at | O | T | 5 |  | 460.5  | 21.935  | OT | 1.45E-05 |          | 1.72E-07 | 9.59E-07 | 1.53 |      | 1.99 | 1.77 |
| rc_AA963839_s_at | Y | C | 5 |  | 231.8  | 22.662  | YC | 1.89E-02 | 1.72E-07 |          | 2.98E-01 | 1.29 | 1.99 |      | 1.12 |
| rc_AA963839_s_at | Y | T | 5 |  | 259.9  | 12.503  | YT | 1.44E-01 | 9.59E-07 | 2.98E-01 |          | 1.15 | 1.77 | 1.12 |      |
| rc_AA964320_at   | O | C | 5 |  | 6040.2 | 163.786 | OC |          | 3.30E-04 | 2.38E-01 | 6.80E-08 |      | 1.24 | 1.05 | 1.68 |
| rc_AA964320_at   | O | T | 5 |  | 4858.0 | 227.362 | OT | 3.30E-04 |          | 2.86E-05 | 1.90E-04 | 1.24 |      | 1.31 | 1.35 |
| rc_AA964320_at   | Y | C | 5 |  | 6358.6 | 136.766 | YC | 2.38E-01 | 2.86E-05 |          | 1.23E-08 | 1.05 | 1.31 |      | 1.76 |
| rc_AA964320_at   | Y | T | 5 |  | 3605.8 | 194.822 | YT | 6.80E-08 | 1.90E-04 | 1.23E-08 |          | 1.68 | 1.35 | 1.76 |      |
| rc_AI010581_at   | O | C | 5 |  | 519.7  | 18.223  | OC |          | 1.08E-02 | 1.96E-01 | 1.25E-08 |      | 1.19 | 1.08 | 2.49 |
| rc_AI010581_at   | O | T | 5 |  | 435.1  | 26.424  | OT | 1.08E-02 |          | 6.34E-04 | 9.13E-07 | 1.19 |      | 1.29 | 2.08 |
| rc_AI010581_at   | Y | C | 5 |  | 559.4  | 24.559  | YC | 1.96E-01 | 6.34E-04 |          | 2.24E-09 | 1.08 | 1.29 |      | 2.68 |
| rc_AI010581_at   | Y | T | 5 |  | 209.0  | 9.573   | YT | 1.25E-08 | 9.13E-07 | 2.24E-09 |          | 2.49 | 2.08 | 2.68 |      |
| rc_AI071578_at   | O | C | 5 |  | 576.8  | 76.007  | OC |          | 3.92E-01 | 8.12E-09 | 7.30E-02 |      | 1.35 | 4.18 | 1.56 |
| rc_AI071578_at   | O | T | 5 |  | 428.6  | 68.728  | OT | 3.92E-01 |          | 2.67E-09 | 1.29E-02 | 1.35 |      | 5.63 | 2.10 |
| rc_AI071578_at   | Y | C | 5 |  | 2413.2 | 188.835 | YC | 8.12E-09 | 2.67E-09 |          | 1.19E-07 | 4.18 | 5.63 |      | 2.68 |
| rc_AI071578_at   | Y | T | 5 |  | 900.0  | 102.730 | YT | 7.30E-02 | 1.29E-02 | 1.19E-07 |          | 1.56 | 2.10 | 2.68 |      |
| rc_AI071578_g_at | O | C | 5 |  | 138.3  | 16.319  | OC |          | 4.59E-01 | 4.20E-07 | 1.01E-01 |      | 1.41 | 4.15 | 1.67 |
| rc_AI071578_g_at | O | T | 5 |  | 97.8   | 14.800  | OT | 4.59E-01 |          | 1.29E-07 | 2.36E-02 | 1.41 |      | 5.87 | 2.36 |
| rc_AI071578_g_at | Y | C | 5 |  | 574.4  | 66.495  | YC | 4.20E-07 | 1.29E-07 |          | 8.33E-06 | 4.15 | 5.87 |      | 2.48 |
| rc_AI071578_g_at | Y | T | 5 |  | 231.3  | 28.089  | YT | 1.01E-01 | 2.36E-02 | 8.33E-06 |          | 1.67 | 2.36 | 2.48 |      |
| rc_AI073178_at   | O | C | 5 |  | 3312.9 | 120.076 | OC |          | 2.79E-03 | 1.33E-02 | 1.32E-05 |      | 1.24 | 1.23 | 1.41 |
| rc_AI073178_at   | O | T | 5 |  | 4092.7 | 198.692 | OT | 2.79E-03 |          | 1.04E-05 | 1.74E-02 | 1.24 |      | 1.52 | 1.14 |
| rc_AI073178_at   | Y | C | 5 |  | 2697.9 | 117.542 | YC | 1.33E-02 | 1.04E-05 |          | 1.23E-07 | 1.23 | 1.52 |      | 1.73 |
| rc_AI073178_at   | Y | T | 5 |  | 4679.0 | 173.242 | YT | 1.32E-05 | 1.74E-02 | 1.23E-07 |          | 1.41 | 1.14 | 1.73 |      |
| rc_AI101157_at   | O | C | 5 |  | 4217.6 | 147.846 | OC |          | 3.05E-02 | 2.65E-02 | 4.08E-04 |      | 1.19 | 1.17 | 1.44 |
| rc_AI101157_at   | O | T | 5 |  | 3532.8 | 123.069 | OT | 3.05E-02 |          | 1.90E-04 | 5.49E-02 | 1.19 |      | 1.39 | 1.20 |
| rc_AI101157_at   | Y | C | 5 |  | 4922.7 | 291.902 | YC | 2.65E-02 | 1.90E-04 |          | 3.65E-06 | 1.17 | 1.39 |      | 1.68 |
| rc_AI101157_at   | Y | T | 5 |  | 2935.3 | 210.441 | YT | 4.08E-04 | 5.49E-02 | 3.65E-06 |          | 1.44 | 1.20 | 1.68 |      |
| rc_AI101343_at   | O | C | 5 |  | 180.6  | 6.468   | OC |          | 1.54E-01 | 6.54E-02 | 1.01E-04 |      | 1.08 | 1.09 | 1.32 |
| rc_AI101343_at   | O | T | 5 |  | 168.0  | 4.996   | OT | 1.54E-01 |          | 3.13E-03 | 2.24E-03 | 1.08 |      | 1.18 | 1.22 |
| rc_AI101343_at   | Y | C | 5 |  | 197.4  | 5.999   | YC | 6.54E-02 | 3.13E-03 |          | 2.49E-06 | 1.09 | 1.18 |      | 1.44 |
| rc_AI101343_at   | Y | T | 5 |  | 137.2  | 6.362   | YT | 1.01E-04 | 2.24E-03 | 2.49E-06 |          | 1.32 | 1.22 | 1.44 |      |
| rc_AI101443_i_at | O | C | 5 |  | 352.8  | 16.292  | OC |          | 7.64E-01 | 4.24E-07 | 2.31E-01 |      | 1.33 | 7.56 | 2.00 |
| rc_AI101443_i_at | O | T | 5 |  | 266.2  | 33.431  | OT | 7.64E-01 |          | 2.62E-07 | 1.41E-01 | 1.33 |      | ###  | 2.65 |
| rc_AI101443_i_at | Y | C | 5 |  | 2667.9 | 386.911 | YC | 4.24E-07 | 2.62E-07 |          | 3.44E-06 | 7.56 | ###  |      | 3.78 |
| rc_AI101443_i_at | Y | T | 5 |  | 705.6  | 98.199  | YT | 2.31E-01 | 1.41E-01 | 3.44E-06 |          | 2.00 | 2.65 | 3.78 |      |
| rc_AI101443_r_at | O | C | 5 |  | 1098.3 | 68.065  | OC |          | 7.57E-01 | 2.58E-07 | 6.24E-02 |      | 1.23 | 6.09 | 2.20 |
| rc_AI101443_r_at | O | T | 5 |  | 891.0  | 117.334 | OT | 7.57E-01 |          | 1.59E-07 | 3.41E-02 | 1.23 |      | 7.50 | 2.71 |
| rc_AI101443_r_at | Y | C | 5 |  | 6685.6 | 867.664 | YC | 2.58E-07 | 1.59E-07 |          | 7.64E-06 | 6.09 | 7.50 |      | 2.76 |
| rc_AI101443_r_at | Y | T | 5 |  | 2418.0 | 311.550 | YT | 6.24E-02 | 3.41E-02 | 7.64E-06 |          | 2.20 | 2.71 | 2.76 |      |
| rc_AI101443_s_at | O | C | 5 |  | 2654.5 | 146.311 | OC |          | 2.80E-01 | 9.05E-10 | 2.46E-03 |      | 1.39 | 4.17 | 1.90 |

|                  |   |   |   |  |         |         |    |          |          |          |          |      |      |      |      |
|------------------|---|---|---|--|---------|---------|----|----------|----------|----------|----------|------|------|------|------|
| rc_AI101443_s_at | O | T | 5 |  | 1913.9  | 330.797 | OT | 2.80E-01 |          | 2.61E-10 | 2.38E-04 | 1.39 |      | 5.78 | 2.63 |
| rc_AI101443_s_at | Y | C | 5 |  | 11070.4 | 733.332 | YC | 9.05E-10 | 2.61E-10 |          | 9.91E-08 | 4.17 | 5.78 |      | 2.20 |
| rc_AI101443_s_at | Y | T | 5 |  | 5032.7  | 458.498 | YT | 2.46E-03 | 2.38E-04 | 9.91E-08 |          | 1.90 | 2.63 | 2.20 |      |
| rc_AI102715_at   | O | C | 5 |  | 629.4   | 21.386  | OC |          | 4.30E-07 | 3.29E-03 | 1.08E-08 |      | 1.45 | 1.13 | 1.69 |
| rc_AI102715_at   | O | T | 5 |  | 432.7   | 13.594  | OT | 4.30E-07 |          | 3.32E-09 | 2.21E-02 | 1.45 |      | 1.65 | 1.16 |
| rc_AI102715_at   | Y | C | 5 |  | 712.6   | 20.352  | YC | 3.29E-03 | 3.32E-09 |          | 1.84E-10 | 1.13 | 1.65 |      | 1.92 |
| rc_AI102715_at   | Y | T | 5 |  | 371.6   | 10.323  | YT | 1.08E-08 | 2.21E-02 | 1.84E-10 |          | 1.69 | 1.16 | 1.92 |      |
| rc_AI103500_f_at | O | C | 5 |  | 963.9   | 37.328  | OC |          | 7.58E-04 | 4.81E-07 | 8.01E-06 |      | 1.29 | 1.80 | 1.55 |
| rc_AI103500_f_at | O | T | 5 |  | 744.8   | 54.014  | OT | 7.58E-04 |          | 1.17E-03 | 3.50E-02 | 1.29 |      | 1.39 | 1.20 |
| rc_AI103500_f_at | Y | C | 5 |  | 536.6   | 29.007  | YC | 4.81E-07 | 1.17E-03 |          | 1.21E-01 | 1.80 | 1.39 |      | 1.16 |
| rc_AI103500_f_at | Y | T | 5 |  | 623.0   | 20.778  | YT | 8.01E-06 | 3.50E-02 | 1.21E-01 |          | 1.55 | 1.20 | 1.16 |      |
| rc_AI103774_at   | O | C | 5 |  | 288.4   | 10.840  | OC |          | 8.41E-09 | 4.05E-04 | 8.63E-09 |      | 1.73 | 1.21 | 1.73 |
| rc_AI103774_at   | O | T | 5 |  | 166.8   | 4.391   | OT | 8.41E-09 |          | 8.31E-06 | 9.85E-01 | 1.73 |      | 1.43 | 1.00 |
| rc_AI103774_at   | Y | C | 5 |  | 238.7   | 5.330   | YC | 4.05E-04 | 8.31E-06 |          | 8.62E-06 | 1.21 | 1.43 |      | 1.43 |
| rc_AI103774_at   | Y | T | 5 |  | 167.1   | 9.195   | YT | 8.63E-09 | 9.85E-01 | 8.62E-06 |          | 1.73 | 1.00 | 1.43 |      |
| rc_AI103851_at   | O | C | 5 |  | 2794.0  | 125.806 | OC |          | 3.82E-04 | 1.33E-03 | 7.57E-05 |      | 1.46 | 1.27 | 1.59 |
| rc_AI103851_at   | O | T | 5 |  | 1910.8  | 98.800  | OT | 3.82E-04 |          | 3.14E-07 | 4.37E-01 | 1.46 |      | 1.86 | 1.09 |
| rc_AI103851_at   | Y | C | 5 |  | 3559.7  | 214.916 | YC | 1.33E-03 | 3.14E-07 |          | 9.27E-08 | 1.27 | 1.86 |      | 2.03 |
| rc_AI103851_at   | Y | T | 5 |  | 1753.3  | 78.192  | YT | 7.57E-05 | 4.37E-01 | 9.27E-08 |          | 1.59 | 1.09 | 2.03 |      |
| rc_AI104035_s_at | O | C | 5 |  | 4297.4  | 152.403 | OC |          | 5.88E-04 | 1.03E-02 | 6.32E-06 |      | 1.30 | 1.16 | 1.56 |
| rc_AI104035_s_at | O | T | 5 |  | 3300.2  | 120.967 | OT | 5.88E-04 |          | 2.20E-06 | 3.44E-02 | 1.30 |      | 1.51 | 1.20 |
| rc_AI104035_s_at | Y | C | 5 |  | 4976.6  | 190.957 | YC | 1.03E-02 | 2.20E-06 |          | 5.68E-08 | 1.16 | 1.51 |      | 1.80 |
| rc_AI104035_s_at | Y | T | 5 |  | 2760.0  | 186.600 | YT | 6.32E-06 | 3.44E-02 | 5.68E-08 |          | 1.56 | 1.20 | 1.80 |      |
| rc_AI104244_s_at | O | C | 5 |  | 2278.6  | 58.623  | OC |          | 1.46E-01 | 7.51E-07 | 8.31E-04 |      | 1.06 | 1.30 | 1.19 |
| rc_AI104244_s_at | O | T | 5 |  | 2143.6  | 60.328  | OT | 1.46E-01 |          | 7.01E-08 | 2.04E-02 | 1.06 |      | 1.39 | 1.12 |
| rc_AI104244_s_at | Y | C | 5 |  | 2969.1  | 76.263  | YC | 7.51E-07 | 7.01E-08 |          | 2.27E-09 | 1.30 | 1.39 |      | 1.55 |
| rc_AI104244_s_at | Y | T | 5 |  | 1916.1  | 52.157  | YT | 8.31E-04 | 2.04E-02 | 2.27E-09 |          | 1.19 | 1.12 | 1.55 |      |
| rc_AI104393_at   | O | C | 5 |  | 1367.1  | 81.413  | OC |          | 2.71E-04 | 5.91E-01 | 2.41E-08 |      | 1.69 | 1.08 | 2.50 |
| rc_AI104393_at   | O | T | 5 |  | 2308.0  | 125.833 | OT | 2.71E-04 |          | 8.47E-04 | 5.31E-05 | 1.69 |      | 1.56 | 1.48 |
| rc_AI104393_at   | Y | C | 5 |  | 1478.1  | 120.772 | YC | 5.91E-01 | 8.47E-04 |          | 5.21E-08 | 1.08 | 1.56 |      | 2.31 |
| rc_AI104393_at   | Y | T | 5 |  | 3413.5  | 212.453 | YT | 2.41E-08 | 5.31E-05 | 5.21E-08 |          | 2.50 | 1.48 | 2.31 |      |
| rc_AI104567_g_at | O | C | 5 |  | 1538.6  | 89.168  | OC |          | 1.27E-10 | 2.00E-07 | 5.27E-11 |      | 6.27 | 2.00 | 9.21 |
| rc_AI104567_g_at | O | T | 5 |  | 245.2   | 31.602  | OT | 1.27E-10 |          | 2.44E-05 | 3.94E-01 | 6.27 |      | 3.13 | 1.47 |
| rc_AI104567_g_at | Y | C | 5 |  | 767.5   | 81.818  | YC | 2.00E-07 | 2.44E-05 |          | 4.82E-06 | 2.00 | 3.13 |      | 4.59 |
| rc_AI104567_g_at | Y | T | 5 |  | 167.1   | 16.386  | YT | 5.27E-11 | 3.94E-01 | 4.82E-06 |          | 9.21 | 1.47 | 4.59 |      |
| rc_AI104913_at   | O | C | 5 |  | 396.9   | 39.687  | OC |          | 7.40E-02 | 6.32E-02 | 6.54E-06 |      | 1.23 | 1.32 | 1.79 |
| rc_AI104913_at   | O | T | 5 |  | 488.2   | 41.894  | OT | 7.40E-02 |          | 1.25E-03 | 2.67E-04 | 1.23 |      | 1.62 | 1.46 |
| rc_AI104913_at   | Y | C | 5 |  | 301.5   | 11.295  | YC | 6.32E-02 | 1.25E-03 |          | 2.29E-07 | 1.32 | 1.62 |      | 2.36 |
| rc_AI104913_at   | Y | T | 5 |  | 710.4   | 33.269  | YT | 6.54E-06 | 2.67E-04 | 2.29E-07 |          | 1.79 | 1.46 | 2.36 |      |
| rc_AI104953_s_at | O | C | 5 |  | 2677.9  | 96.155  | OC |          | 1.03E-03 | 1.29E-01 | 6.35E-06 |      | 1.50 | 1.13 | 2.20 |
| rc_AI104953_s_at | O | T | 5 |  | 1789.1  | 104.193 | OT | 1.03E-03 |          | 3.97E-05 | 2.03E-02 | 1.50 |      | 1.70 | 1.47 |
| rc_AI104953_s_at | Y | C | 5 |  | 3033.0  | 234.490 | YC | 1.29E-01 | 3.97E-05 |          | 4.17E-07 | 1.13 | 1.70 |      | 2.49 |
| rc_AI104953_s_at | Y | T | 5 |  | 1217.2  | 153.433 | YT | 6.35E-06 | 2.03E-02 | 4.17E-07 |          | 2.20 | 1.47 | 2.49 |      |
| rc_AI105149_at   | O | C | 5 |  | 1314.3  | 23.903  | OC |          | 5.51E-04 | 2.08E-01 | 8.34E-07 |      | 1.22 | 1.05 | 1.48 |
| rc_AI105149_at   | O | T | 5 |  | 1078.4  | 16.204  | OT | 5.51E-04 |          | 3.90E-05 | 3.29E-03 | 1.22 |      | 1.29 | 1.21 |

|                |   |   |   |  |        |        |    |          |          |          |          |      |      |      |      |
|----------------|---|---|---|--|--------|--------|----|----------|----------|----------|----------|------|------|------|------|
| rc_AI105149_at | Y | C | 5 |  | 1386.2 | 53.469 | YC | 2.08E-01 | 3.90E-05 |          | 1.06E-07 | 1.05 | 1.29 |      | 1.56 |
| rc_AI105149_at | Y | T | 5 |  | 889.0  | 48.242 | YT | 8.34E-07 | 3.29E-03 | 1.06E-07 |          | 1.48 | 1.21 | 1.56 |      |
| rc_AI105188_at | O | C | 5 |  | 222.6  | 6.290  | OC |          | 5.08E-02 | 2.56E-02 | 6.40E-04 |      | 1.18 | 1.26 | 1.35 |
| rc_AI105188_at | O | T | 5 |  | 261.9  | 20.841 | OT | 5.08E-02 |          | 3.13E-04 | 5.03E-02 | 1.18 |      | 1.48 | 1.15 |
| rc_AI105188_at | Y | C | 5 |  | 176.9  | 9.289  | YC | 2.56E-02 | 3.13E-04 |          | 5.21E-06 | 1.26 | 1.48 |      | 1.70 |
| rc_AI105188_at | Y | T | 5 |  | 301.3  | 11.473 | YT | 6.40E-04 | 5.03E-02 | 5.21E-06 |          | 1.35 | 1.15 | 1.70 |      |
| rc_AI105435_at | O | C | 5 |  | 284.4  | 5.198  | OC |          | 3.11E-01 | 4.69E-07 | 8.10E-12 |      | 1.06 | 1.50 | 2.07 |
| rc_AI105435_at | O | T | 5 |  | 302.8  | 18.463 | OT | 3.11E-01 |          | 2.71E-06 | 2.08E-11 | 1.06 |      | 1.41 | 1.95 |
| rc_AI105435_at | Y | C | 5 |  | 426.7  | 12.560 | YC | 4.69E-07 | 2.71E-06 |          | 7.52E-08 | 1.50 | 1.41 |      | 1.38 |
| rc_AI105435_at | Y | T | 5 |  | 590.0  | 9.550  | YT | 8.10E-12 | 2.08E-11 | 7.52E-08 |          | 2.07 | 1.95 | 1.38 |      |
| rc_AI105451_at | O | C | 5 |  | 100.8  | 5.656  | OC |          | 3.70E-04 | 5.88E-02 | 7.14E-08 |      | 1.67 | 1.44 | 2.39 |
| rc_AI105451_at | O | T | 5 |  | 168.5  | 10.044 | OT | 3.70E-04 |          | 6.99E-06 | 1.81E-04 | 1.67 |      | 2.40 | 1.43 |
| rc_AI105451_at | Y | C | 5 |  | 70.2   | 9.207  | YC | 5.88E-02 | 6.99E-06 |          | 4.50E-09 | 1.44 | 2.40 |      | 3.44 |
| rc_AI105451_at | Y | T | 5 |  | 241.4  | 15.361 | YT | 7.14E-08 | 1.81E-04 | 4.50E-09 |          | 2.39 | 1.43 | 3.44 |      |
| rc_AI137210_at | O | C | 5 |  | 688.3  | 33.850 | OC |          | 1.26E-03 | 4.28E-02 | 4.09E-06 |      | 1.25 | 1.11 | 1.53 |
| rc_AI137210_at | O | T | 5 |  | 551.6  | 25.421 | OT | 1.26E-03 |          | 1.51E-05 | 1.01E-02 | 1.25 |      | 1.39 | 1.23 |
| rc_AI137210_at | Y | C | 5 |  | 765.4  | 22.045 | YC | 4.28E-02 | 1.51E-05 |          | 1.12E-07 | 1.11 | 1.39 |      | 1.70 |
| rc_AI137210_at | Y | T | 5 |  | 449.5  | 13.123 | YT | 4.09E-06 | 1.01E-02 | 1.12E-07 |          | 1.53 | 1.23 | 1.70 |      |
| rc_AI137344_at | O | C | 5 |  | 124.1  | 16.371 | OC |          | 5.05E-04 | 9.03E-01 | 8.82E-10 |      | 1.92 | 1.03 | 3.70 |
| rc_AI137344_at | O | T | 5 |  | 238.6  | 21.775 | OT | 5.05E-04 |          | 3.90E-04 | 3.03E-07 | 1.92 |      | 1.97 | 1.93 |
| rc_AI137344_at | Y | C | 5 |  | 120.8  | 8.153  | YC | 9.03E-01 | 3.90E-04 |          | 7.64E-10 | 1.03 | 1.97 |      | 3.80 |
| rc_AI137344_at | Y | T | 5 |  | 459.5  | 24.123 | YT | 8.82E-10 | 3.03E-07 | 7.64E-10 |          | 3.70 | 1.93 | 3.80 |      |
| rc_AI137553_at | O | C | 5 |  | 348.3  | 24.943 | OC |          | 2.77E-10 | 8.08E-07 | 2.76E-11 |      | 4.78 | 1.81 | ###  |
| rc_AI137553_at | O | T | 5 |  | 72.9   | 12.540 | OT | 2.77E-10 |          | 1.89E-05 | 3.59E-02 | 4.78 |      | 2.64 | 2.69 |
| rc_AI137553_at | Y | C | 5 |  | 192.8  | 4.134  | YC | 8.08E-07 | 1.89E-05 |          | 3.54E-07 | 1.81 | 2.64 |      | 7.12 |
| rc_AI137553_at | Y | T | 5 |  | 27.1   | 2.131  | YT | 2.76E-11 | 3.59E-02 | 3.54E-07 |          | ###  | 2.69 | 7.12 |      |
| rc_AI137579_at | O | C | 5 |  | 125.1  | 12.150 | OC |          | 3.55E-03 | 5.22E-02 | 3.21E-09 |      | 1.79 | 1.49 | 3.70 |
| rc_AI137579_at | O | T | 5 |  | 224.1  | 18.267 | OT | 3.55E-03 |          | 2.06E-01 | 3.88E-07 | 1.79 |      | 1.21 | 2.06 |
| rc_AI137579_at | Y | C | 5 |  | 185.9  | 10.382 | YC | 5.22E-02 | 2.06E-01 |          | 5.27E-08 | 1.49 | 1.21 |      | 2.49 |
| rc_AI137579_at | Y | T | 5 |  | 462.6  | 33.063 | YT | 3.21E-09 | 3.88E-07 | 5.27E-08 |          | 3.70 | 2.06 | 2.49 |      |
| rc_AI144692_at | O | C | 5 |  | 130.0  | 18.951 | OC |          | 5.38E-02 | 1.50E-01 | 1.22E-07 |      | 1.56 | 1.41 | 3.42 |
| rc_AI144692_at | O | T | 5 |  | 203.1  | 21.904 | OT | 5.38E-02 |          | 5.78E-01 | 3.64E-06 | 1.56 |      | 1.11 | 2.19 |
| rc_AI144692_at | Y | C | 5 |  | 183.1  | 26.481 | YC | 1.50E-01 | 5.78E-01 |          | 1.36E-06 | 1.41 | 1.11 |      | 2.43 |
| rc_AI144692_at | Y | T | 5 |  | 444.8  | 30.357 | YT | 1.22E-07 | 3.64E-06 | 1.36E-06 |          | 3.42 | 2.19 | 2.43 |      |
| rc_AI168941_at | O | C | 5 |  | 178.5  | 12.925 | OC |          | 3.57E-04 | 5.33E-07 | 2.27E-05 |      | 1.87 | 1.83 | 2.55 |
| rc_AI168941_at | O | T | 5 |  | 95.4   | 7.597  | OT | 3.57E-04 |          | 1.09E-09 | 1.86E-01 | 1.87 |      | 3.42 | 1.36 |
| rc_AI168941_at | Y | C | 5 |  | 326.2  | 18.646 | YC | 5.33E-07 | 1.09E-09 |          | 2.34E-10 | 1.83 | 3.42 |      | 4.66 |
| rc_AI168941_at | Y | T | 5 |  | 70.0   | 10.275 | YT | 2.27E-05 | 1.86E-01 | 2.34E-10 |          | 2.55 | 1.36 | 4.66 |      |
| rc_AI169053_at | O | C | 5 |  | 460.0  | 25.242 | OC |          | 2.84E-03 | 5.22E-02 | 2.87E-08 |      | 1.51 | 1.30 | 2.45 |
| rc_AI169053_at | O | T | 5 |  | 695.4  | 33.637 | OT | 2.84E-03 |          | 1.74E-01 | 8.04E-06 | 1.51 |      | 1.16 | 1.62 |
| rc_AI169053_at | Y | C | 5 |  | 600.2  | 32.587 | YC | 5.22E-02 | 1.74E-01 |          | 6.83E-07 | 1.30 | 1.16 |      | 1.88 |
| rc_AI169053_at | Y | T | 5 |  | 1126.5 | 78.164 | YT | 2.87E-08 | 8.04E-06 | 6.83E-07 |          | 2.45 | 1.62 | 1.88 |      |
| rc_AI169228_at | O | C | 5 |  | 157.2  | 6.656  | OC |          | 2.98E-02 | 1.39E-03 | 1.09E-03 |      | 1.13 | 1.18 | 1.23 |
| rc_AI169228_at | O | T | 5 |  | 139.4  | 5.906  | OT | 2.98E-02 |          | 1.17E-05 | 1.32E-01 | 1.13 |      | 1.33 | 1.09 |
| rc_AI169228_at | Y | C | 5 |  | 185.8  | 3.365  | YC | 1.39E-03 | 1.17E-05 |          | 7.30E-07 | 1.18 | 1.33 |      | 1.46 |

|                  |   |   |   |  |        |         |    |          |          |          |          |       |      |      |       |
|------------------|---|---|---|--|--------|---------|----|----------|----------|----------|----------|-------|------|------|-------|
| rc_AI169228_at   | Y | T | 5 |  | 127.6  | 4.465   | YT | 1.09E-03 | 1.32E-01 | 7.30E-07 |          | 1.23  | 1.09 | 1.46 |       |
| rc_AI169831_at   | O | C | 5 |  | 299.7  | 13.590  | OC |          | 2.78E-06 | 6.35E-04 | 2.66E-06 |       | 2.92 | 1.65 | 2.94  |
| rc_AI169831_at   | O | T | 5 |  | 102.7  | 11.237  | OT | 2.78E-06 |          | 1.26E-02 | 9.80E-01 | 2.92  |      | 1.77 | 1.01  |
| rc_AI169831_at   | Y | C | 5 |  | 181.3  | 34.572  | YC | 6.35E-04 | 1.26E-02 |          | 1.19E-02 | 1.65  | 1.77 |      | 1.78  |
| rc_AI169831_at   | Y | T | 5 |  | 102.0  | 7.586   | YT | 2.66E-06 | 9.80E-01 | 1.19E-02 |          | 2.94  | 1.01 | 1.78 |       |
| rc_AI170613_g_at | O | C | 5 |  | 668.0  | 28.507  | OC |          | 4.35E-02 | 2.63E-03 | 2.48E-03 |       | 1.13 | 1.18 | 1.22  |
| rc_AI170613_g_at | O | T | 5 |  | 593.7  | 12.995  | OT | 4.35E-02 |          | 2.98E-05 | 1.83E-01 | 1.13  |      | 1.33 | 1.09  |
| rc_AI170613_g_at | Y | C | 5 |  | 788.5  | 32.180  | YC | 2.63E-03 | 2.98E-05 |          | 2.34E-06 | 1.18  | 1.33 |      | 1.44  |
| rc_AI170613_g_at | Y | T | 5 |  | 546.6  | 16.636  | YT | 2.48E-03 | 1.83E-01 | 2.34E-06 |          | 1.22  | 1.09 | 1.44 |       |
| rc_AI170709_at   | O | C | 5 |  | 615.3  | 34.225  | OC |          | 3.24E-02 | 1.30E-02 | 4.56E-04 |       | 1.25 | 1.43 | 1.47  |
| rc_AI170709_at   | O | T | 5 |  | 770.6  | 61.101  | OT | 3.24E-02 |          | 9.93E-05 | 5.73E-02 | 1.25  |      | 1.79 | 1.18  |
| rc_AI170709_at   | Y | C | 5 |  | 429.9  | 33.925  | YC | 1.30E-02 | 9.93E-05 |          | 2.17E-06 | 1.43  | 1.79 |      | 2.11  |
| rc_AI170709_at   | Y | T | 5 |  | 906.4  | 52.354  | YT | 4.56E-04 | 5.73E-02 | 2.17E-06 |          | 1.47  | 1.18 | 2.11 |       |
| rc_AI170770_at   | O | C | 5 |  | 2337.4 | 65.545  | OC |          | 3.03E-05 | 7.55E-02 | 3.14E-08 |       | 1.30 | 1.08 | 1.67  |
| rc_AI170770_at   | O | T | 5 |  | 1793.1 | 88.447  | OT | 3.03E-05 |          | 9.98E-07 | 7.36E-04 | 1.30  |      | 1.40 | 1.28  |
| rc_AI170770_at   | Y | C | 5 |  | 2517.6 | 67.231  | YC | 7.55E-02 | 9.98E-07 |          | 2.61E-09 | 1.08  | 1.40 |      | 1.80  |
| rc_AI170770_at   | Y | T | 5 |  | 1398.7 | 36.510  | YT | 3.14E-08 | 7.36E-04 | 2.61E-09 |          | 1.67  | 1.28 | 1.80 |       |
| rc_AI170775_at   | O | C | 5 |  | 5380.5 | 130.385 | OC |          | 1.64E-09 | 3.43E-03 | 6.86E-12 |       | 2.37 | 1.16 | 6.00  |
| rc_AI170775_at   | O | T | 5 |  | 2273.8 | 247.777 | OT | 1.64E-09 |          | 4.16E-11 | 5.87E-05 | 2.37  |      | 2.75 | 2.54  |
| rc_AI170775_at   | Y | C | 5 |  | 6254.9 | 204.384 | YC | 3.43E-03 | 4.16E-11 |          | 4.44E-13 | 1.16  | 2.75 |      | 6.97  |
| rc_AI170775_at   | Y | T | 5 |  | 896.8  | 98.910  | YT | 6.86E-12 | 5.87E-05 | 4.44E-13 |          | 6.00  | 2.54 | 6.97 |       |
| rc_AI170777_at   | O | C | 5 |  | 5434.3 | 138.750 | OC |          | 3.41E-02 | 4.38E-04 | 7.34E-03 |       | 1.15 | 1.25 | 1.21  |
| rc_AI170777_at   | O | T | 5 |  | 4718.5 | 206.290 | OT | 3.41E-02 |          | 4.87E-06 | 4.62E-01 | 1.15  |      | 1.44 | 1.05  |
| rc_AI170777_at   | Y | C | 5 |  | 6797.2 | 349.369 | YC | 4.38E-04 | 4.87E-06 |          | 1.31E-06 | 1.25  | 1.44 |      | 1.52  |
| rc_AI170777_at   | Y | T | 5 |  | 4485.8 | 84.740  | YT | 7.34E-03 | 4.62E-01 | 1.31E-06 |          | 1.21  | 1.05 | 1.52 |       |
| rc_AI170777_g_at | O | C | 5 |  | 3411.3 | 52.832  | OC |          | 3.22E-03 | 3.07E-05 | 6.73E-03 |       | 1.18 | 1.26 | 1.16  |
| rc_AI170777_g_at | O | T | 5 |  | 2885.6 | 98.367  | OT | 3.22E-03 |          | 8.69E-08 | 7.30E-01 | 1.18  |      | 1.48 | 1.02  |
| rc_AI170777_g_at | Y | C | 5 |  | 4282.5 | 166.649 | YC | 3.07E-05 | 8.69E-08 |          | 1.47E-07 | 1.26  | 1.48 |      | 1.46  |
| rc_AI170777_g_at | Y | T | 5 |  | 2938.9 | 76.812  | YT | 6.73E-03 | 7.30E-01 | 1.47E-07 |          | 1.16  | 1.02 | 1.46 |       |
| rc_AI170847_at   | O | C | 5 |  | 5250.2 | 394.113 | OC |          | 5.38E-07 | 9.10E-02 | 8.08E-09 |       | 3.02 | 1.15 | 11.13 |
| rc_AI170847_at   | O | T | 5 |  | 1737.9 | 415.893 | OT | 5.38E-07 |          | 3.55E-08 | 1.07E-02 | 3.02  |      | 3.47 | 3.68  |
| rc_AI170847_at   | Y | C | 5 |  | 6037.8 | 229.693 | YC | 9.10E-02 | 3.55E-08 |          | 8.94E-10 | 1.15  | 3.47 |      | ###   |
| rc_AI170847_at   | Y | T | 5 |  | 471.9  | 51.888  | YT | 8.08E-09 | 1.07E-02 | 8.94E-10 |          | 11.13 | 3.68 | ###  |       |
| rc_AI170956_at   | O | C | 5 |  | 398.4  | 35.983  | OC |          | 2.15E-03 | 1.54E-04 | 4.53E-04 |       | 1.79 | 1.59 | 2.13  |
| rc_AI170956_at   | O | T | 5 |  | 222.7  | 21.688  | OT | 2.15E-03 |          | 2.24E-07 | 4.68E-01 | 1.79  |      | 2.85 | 1.19  |
| rc_AI170956_at   | Y | C | 5 |  | 635.2  | 53.086  | YC | 1.54E-04 | 2.24E-07 |          | 7.32E-08 | 1.59  | 2.85 |      | 3.40  |
| rc_AI170956_at   | Y | T | 5 |  | 186.9  | 7.122   | YT | 4.53E-04 | 4.68E-01 | 7.32E-08 |          | 2.13  | 1.19 | 3.40 |       |
| rc_AI171350_at   | O | C | 5 |  | 309.9  | 22.952  | OC |          | 4.26E-02 | 7.69E-07 | 2.95E-01 |       | 1.19 | 1.56 | 1.08  |
| rc_AI171350_at   | O | T | 5 |  | 260.8  | 9.856   | OT | 4.26E-02 |          | 2.74E-08 | 2.80E-01 | 1.19  |      | 1.86 | 1.10  |
| rc_AI171350_at   | Y | C | 5 |  | 483.9  | 14.704  | YC | 7.69E-07 | 2.74E-08 |          | 1.39E-07 | 1.56  | 1.86 |      | 1.69  |
| rc_AI171350_at   | Y | T | 5 |  | 285.7  | 12.468  | YT | 2.95E-01 | 2.80E-01 | 1.39E-07 |          | 1.08  | 1.10 | 1.69 |       |
| rc_AI171448_at   | O | C | 5 |  | 979.8  | 69.213  | OC |          | 7.25E-04 | 1.09E-02 | 4.45E-05 |       | 1.50 | 1.23 | 1.81  |
| rc_AI171448_at   | O | T | 5 |  | 651.0  | 30.226  | OT | 7.25E-04 |          | 2.76E-06 | 1.88E-01 | 1.50  |      | 1.85 | 1.20  |
| rc_AI171448_at   | Y | C | 5 |  | 1206.9 | 78.101  | YC | 1.09E-02 | 2.76E-06 |          | 2.82E-07 | 1.23  | 1.85 |      | 2.22  |
| rc_AI171448_at   | Y | T | 5 |  | 542.5  | 25.255  | YT | 4.45E-05 | 1.88E-01 | 2.82E-07 |          | 1.81  | 1.20 | 2.22 |       |

|                |   |   |   |  |        |         |    |          |          |          |          |      |      |      |      |
|----------------|---|---|---|--|--------|---------|----|----------|----------|----------|----------|------|------|------|------|
| rc_AI171452_at | O | C | 5 |  | 1363.7 | 65.181  | OC |          | 2.97E-06 | 8.28E-05 | 4.06E-06 |      | 2.17 | 1.40 | 2.11 |
| rc_AI171452_at | O | T | 5 |  | 629.1  | 52.797  | OT | 2.97E-06 |          | 1.55E-09 | 8.62E-01 | 2.17 |      | 3.04 | 1.03 |
| rc_AI171452_at | Y | C | 5 |  | 1912.0 | 107.994 | YC | 8.28E-05 | 1.55E-09 |          | 1.92E-09 | 1.40 | 3.04 |      | 2.95 |
| rc_AI171452_at | Y | T | 5 |  | 647.7  | 57.370  | YT | 4.06E-06 | 8.62E-01 | 1.92E-09 |          | 2.11 | 1.03 | 2.95 |      |
| rc_AI171587_at | O | C | 5 |  | 407.3  | 15.895  | OC |          | 4.88E-05 | 1.95E-02 | 1.07E-06 |      | 1.55 | 1.35 | 1.77 |
| rc_AI171587_at | O | T | 5 |  | 633.1  | 35.555  | OT | 4.88E-05 |          | 4.79E-07 | 5.16E-02 | 1.55 |      | 2.11 | 1.14 |
| rc_AI171587_at | Y | C | 5 |  | 300.7  | 34.367  | YC | 1.95E-02 | 4.79E-07 |          | 2.10E-08 | 1.35 | 2.11 |      | 2.39 |
| rc_AI171587_at | Y | T | 5 |  | 719.5  | 26.052  | YT | 1.07E-06 | 5.16E-02 | 2.10E-08 |          | 1.77 | 1.14 | 2.39 |      |
| rc_AI171994_at | O | C | 5 |  | 2083.0 | 61.055  | OC |          | 3.60E-03 | 8.97E-01 | 5.33E-07 |      | 1.16 | 1.01 | 1.49 |
| rc_AI171994_at | O | T | 5 |  | 1793.7 | 42.526  | OT | 3.60E-03 |          | 4.74E-03 | 2.86E-04 | 1.16 |      | 1.16 | 1.28 |
| rc_AI171994_at | Y | C | 5 |  | 2071.9 | 41.217  | YC | 8.97E-01 | 4.74E-03 |          | 6.60E-07 | 1.01 | 1.16 |      | 1.48 |
| rc_AI171994_at | Y | T | 5 |  | 1401.7 | 84.748  | YT | 5.33E-07 | 2.86E-04 | 6.60E-07 |          | 1.49 | 1.28 | 1.48 |      |
| rc_AI172057_at | O | C | 5 |  | 477.7  | 22.942  | OC |          | 7.76E-02 | 8.51E-04 | 2.05E-10 |      | 1.16 | 1.36 | 2.23 |
| rc_AI172057_at | O | T | 5 |  | 556.4  | 23.634  | OT | 7.76E-02 |          | 4.24E-02 | 1.70E-09 | 1.16 |      | 1.17 | 1.91 |
| rc_AI172057_at | Y | C | 5 |  | 648.4  | 33.441  | YC | 8.51E-04 | 4.24E-02 |          | 2.94E-08 | 1.36 | 1.17 |      | 1.64 |
| rc_AI172057_at | Y | T | 5 |  | 1063.6 | 35.745  | YT | 2.05E-10 | 1.70E-09 | 2.94E-08 |          | 2.23 | 1.91 | 1.64 |      |
| rc_AI172308_at | O | C | 5 |  | 455.4  | 14.893  | OC |          | 1.85E-04 | 5.99E-01 | 1.15E-07 |      | 1.34 | 1.04 | 1.64 |
| rc_AI172308_at | O | T | 5 |  | 612.3  | 23.419  | OT | 1.85E-04 |          | 6.30E-05 | 7.12E-04 | 1.34 |      | 1.40 | 1.22 |
| rc_AI172308_at | Y | C | 5 |  | 438.0  | 27.432  | YC | 5.99E-01 | 6.30E-05 |          | 5.24E-08 | 1.04 | 1.40 |      | 1.71 |
| rc_AI172308_at | Y | T | 5 |  | 748.0  | 24.252  | YT | 1.15E-07 | 7.12E-04 | 5.24E-08 |          | 1.64 | 1.22 | 1.71 |      |
| rc_AI172335_at | O | C | 5 |  | 374.8  | 33.324  | OC |          | 7.12E-07 | 1.42E-09 | 1.67E-07 |      | 2.45 | 1.93 | 2.94 |
| rc_AI172335_at | O | T | 5 |  | 153.2  | 5.491   | OT | 7.12E-07 |          | 8.47E-13 | 3.74E-01 | 2.45 |      | 4.71 | 1.20 |
| rc_AI172335_at | Y | C | 5 |  | 722.5  | 18.540  | YC | 1.42E-09 | 8.47E-13 |          | 4.27E-13 | 1.93 | 4.71 |      | 5.67 |
| rc_AI172335_at | Y | T | 5 |  | 127.4  | 10.515  | YT | 1.67E-07 | 3.74E-01 | 4.27E-13 |          | 2.94 | 1.20 | 5.67 |      |
| rc_AI172411_at | O | C | 5 |  | 1785.5 | 80.856  | OC |          | 1.99E-07 | 1.59E-03 | 5.48E-08 |      | 1.81 | 1.56 | 1.90 |
| rc_AI172411_at | O | T | 5 |  | 3238.9 | 109.785 | OT | 1.99E-07 |          | 1.22E-09 | 3.99E-01 | 1.81 |      | 2.82 | 1.04 |
| rc_AI172411_at | Y | C | 5 |  | 1147.6 | 113.336 | YC | 1.59E-03 | 1.22E-09 |          | 4.53E-10 | 1.56 | 2.82 |      | 2.95 |
| rc_AI172411_at | Y | T | 5 |  | 3384.5 | 158.342 | YT | 5.48E-08 | 3.99E-01 | 4.53E-10 |          | 1.90 | 1.04 | 2.95 |      |
| rc_AI172417_at | O | C | 5 |  | 184.5  | 6.823   | OC |          | 6.77E-01 | 5.14E-02 | 8.38E-08 |      | 1.06 | 1.28 | 2.21 |
| rc_AI172417_at | O | T | 5 |  | 194.8  | 20.427  | OT | 6.77E-01 |          | 1.12E-01 | 1.58E-07 | 1.06 |      | 1.21 | 2.09 |
| rc_AI172417_at | Y | C | 5 |  | 235.3  | 14.633  | YC | 5.14E-02 | 1.12E-01 |          | 2.45E-06 | 1.28 | 1.21 |      | 1.73 |
| rc_AI172417_at | Y | T | 5 |  | 406.9  | 22.024  | YT | 8.38E-08 | 1.58E-07 | 2.45E-06 |          | 2.21 | 2.09 | 1.73 |      |
| rc_AI172471_at | O | C | 5 |  | 6111.4 | 245.599 | OC |          | 5.47E-08 | 9.16E-04 | 3.79E-08 |      | 1.59 | 1.16 | 1.62 |
| rc_AI172471_at | O | T | 5 |  | 3839.2 | 109.758 | OT | 5.47E-08 |          | 3.40E-10 | 8.00E-01 | 1.59 |      | 1.84 | 1.02 |
| rc_AI172471_at | Y | C | 5 |  | 7080.4 | 190.128 | YC | 9.16E-04 | 3.40E-10 |          | 2.57E-10 | 1.16 | 1.84 |      | 1.87 |
| rc_AI172471_at | Y | T | 5 |  | 3777.6 | 74.731  | YT | 3.79E-08 | 8.00E-01 | 2.57E-10 |          | 1.62 | 1.02 | 1.87 |      |
| rc_AI175100_at | O | C | 5 |  | 626.5  | 19.985  | OC |          | 4.72E-02 | 1.18E-01 | 1.87E-05 |      | 1.29 | 1.29 | 1.81 |
| rc_AI175100_at | O | T | 5 |  | 809.3  | 68.269  | OT | 4.72E-02 |          | 1.57E-03 | 1.43E-03 | 1.29 |      | 1.66 | 1.40 |
| rc_AI175100_at | Y | C | 5 |  | 486.1  | 49.506  | YC | 1.18E-01 | 1.57E-03 |          | 9.94E-07 | 1.29 | 1.66 |      | 2.34 |
| rc_AI175100_at | Y | T | 5 |  | 1136.1 | 83.361  | YT | 1.87E-05 | 1.43E-03 | 9.94E-07 |          | 1.81 | 1.40 | 2.34 |      |
| rc_AI175474_at | O | C | 5 |  | 1262.2 | 54.727  | OC |          | 9.36E-02 | 2.56E-02 | 3.32E-04 |      | 1.17 | 1.30 | 1.43 |
| rc_AI175474_at | O | T | 5 |  | 1474.9 | 100.339 | OT | 9.36E-02 |          | 6.18E-04 | 1.39E-02 | 1.17 |      | 1.52 | 1.22 |
| rc_AI175474_at | Y | C | 5 |  | 968.5  | 87.310  | YC | 2.56E-02 | 6.18E-04 |          | 2.96E-06 | 1.30 | 1.52 |      | 1.86 |
| rc_AI175474_at | Y | T | 5 |  | 1804.4 | 88.258  | YT | 3.32E-04 | 1.39E-02 | 2.96E-06 |          | 1.43 | 1.22 | 1.86 |      |
| rc_AI175529_at | O | C | 5 |  | 2147.9 | 89.194  | OC |          | 2.08E-06 | 1.83E-01 | 3.78E-03 |      | 1.89 | 1.10 | 1.28 |

|                  |   |   |   |  |        |         |    |          |          |          |          |      |      |      |      |
|------------------|---|---|---|--|--------|---------|----|----------|----------|----------|----------|------|------|------|------|
| rc_AI175529_at   | O | T | 5 |  | 1136.8 | 120.485 | OT | 2.08E-06 |          | 2.61E-05 | 1.49E-03 | 1.89 |      | 1.72 | 1.47 |
| rc_AI175529_at   | Y | C | 5 |  | 1952.9 | 73.387  | YC | 1.83E-01 | 2.61E-05 |          | 6.35E-02 | 1.10 | 1.72 |      | 1.17 |
| rc_AI175529_at   | Y | T | 5 |  | 1673.3 | 107.131 | YT | 3.78E-03 | 1.49E-03 | 6.35E-02 |          | 1.28 | 1.47 | 1.17 |      |
| rc_AI175594_at   | O | C | 5 |  | 51.9   | 2.875   | OC |          | 2.32E-03 | 2.39E-01 | 1.00E-06 |      | 1.39 | 1.15 | 1.82 |
| rc_AI175594_at   | O | T | 5 |  | 71.9   | 4.427   | OT | 2.32E-03 |          | 1.81E-04 | 9.81E-04 | 1.39 |      | 1.59 | 1.31 |
| rc_AI175594_at   | Y | C | 5 |  | 45.1   | 2.890   | YC | 2.39E-01 | 1.81E-04 |          | 1.43E-07 | 1.15 | 1.59 |      | 2.09 |
| rc_AI175594_at   | Y | T | 5 |  | 94.2   | 5.020   | YT | 1.00E-06 | 9.81E-04 | 1.43E-07 |          | 1.82 | 1.31 | 2.09 |      |
| rc_AI175875_s_at | O | C | 5 |  | 260.1  | 18.698  | OC |          | 2.53E-01 | 1.30E-06 | 9.94E-01 |      | 1.50 | 3.10 | 1.00 |
| rc_AI175875_s_at | O | T | 5 |  | 173.5  | 23.583  | OT | 2.53E-01 |          | 1.92E-07 | 2.50E-01 | 1.50 |      | 4.65 | 1.50 |
| rc_AI175875_s_at | Y | C | 5 |  | 806.7  | 97.075  | YC | 1.30E-06 | 1.92E-07 |          | 1.32E-06 | 3.10 | 4.65 |      | 3.09 |
| rc_AI175875_s_at | Y | T | 5 |  | 260.6  | 18.277  | YT | 9.94E-01 | 2.50E-01 | 1.32E-06 |          | 1.00 | 1.50 | 3.09 |      |
| rc_AI176362_at   | O | C | 5 |  | 488.1  | 55.343  | OC |          | 2.21E-04 | 2.98E-02 | 6.61E-07 |      | 1.50 | 1.34 | 1.84 |
| rc_AI176362_at   | O | T | 5 |  | 733.2  | 36.399  | OT | 2.21E-04 |          | 2.40E-06 | 6.20E-03 | 1.50 |      | 2.01 | 1.22 |
| rc_AI176362_at   | Y | C | 5 |  | 364.9  | 21.043  | YC | 2.98E-02 | 2.40E-06 |          | 1.88E-08 | 1.34 | 2.01 |      | 2.46 |
| rc_AI176362_at   | Y | T | 5 |  | 896.0  | 22.615  | YT | 6.61E-07 | 6.20E-03 | 1.88E-08 |          | 1.84 | 1.22 | 2.46 |      |
| rc_AI176393_at   | O | C | 5 |  | 294.7  | 19.354  | OC |          | 3.08E-01 | 4.79E-08 | 7.45E-01 |      | 1.14 | 2.10 | 1.04 |
| rc_AI176393_at   | O | T | 5 |  | 259.2  | 3.016   | OT | 3.08E-01 |          | 1.12E-08 | 1.85E-01 | 1.14 |      | 2.39 | 1.18 |
| rc_AI176393_at   | Y | C | 5 |  | 618.5  | 34.739  | YC | 4.79E-08 | 1.12E-08 |          | 7.74E-08 | 2.10 | 2.39 |      | 2.02 |
| rc_AI176393_at   | Y | T | 5 |  | 305.9  | 26.116  | YT | 7.45E-01 | 1.85E-01 | 7.74E-08 |          | 1.04 | 1.18 | 2.02 |      |
| rc_AI176500_at   | O | C | 5 |  | 37.3   | 4.701   | OC |          | 7.77E-02 | 1.63E-06 | 1.84E-01 |      | 1.36 | 2.03 | 1.24 |
| rc_AI176500_at   | O | T | 5 |  | 27.4   | 1.509   | OT | 7.77E-02 |          | 8.18E-08 | 6.27E-01 | 1.36 |      | 2.77 | 1.09 |
| rc_AI176500_at   | Y | C | 5 |  | 75.8   | 4.253   | YC | 1.63E-06 | 8.18E-08 |          | 1.72E-07 | 2.03 | 2.77 |      | 2.53 |
| rc_AI176500_at   | Y | T | 5 |  | 30.0   | 3.533   | YT | 1.84E-01 | 6.27E-01 | 1.72E-07 |          | 1.24 | 1.09 | 2.53 |      |
| rc_AI176540_at   | O | C | 5 |  | 188.2  | 11.241  | OC |          | 2.65E-01 | 6.85E-08 | 7.01E-02 |      | 1.10 | 1.76 | 1.16 |
| rc_AI176540_at   | O | T | 5 |  | 170.4  | 13.684  | OT | 2.65E-01 |          | 1.36E-08 | 6.95E-03 | 1.10 |      | 1.95 | 1.28 |
| rc_AI176540_at   | Y | C | 5 |  | 332.1  | 9.484   | YC | 6.85E-08 | 1.36E-08 |          | 1.46E-06 | 1.76 | 1.95 |      | 1.52 |
| rc_AI176540_at   | Y | T | 5 |  | 218.0  | 8.318   | YT | 7.01E-02 | 6.95E-03 | 1.46E-06 |          | 1.16 | 1.28 | 1.52 |      |
| rc_AI176595_s_at | O | C | 5 |  | 579.1  | 23.208  | OC |          | 3.11E-06 | 7.78E-02 | 1.78E-08 |      | 1.91 | 1.33 | 2.35 |
| rc_AI176595_s_at | O | T | 5 |  | 1106.4 | 90.955  | OT | 3.11E-06 |          | 1.43E-07 | 4.18E-03 | 1.91 |      | 2.53 | 1.23 |
| rc_AI176595_s_at | Y | C | 5 |  | 436.7  | 28.314  | YC | 7.78E-02 | 1.43E-07 |          | 1.62E-09 | 1.33 | 2.53 |      | 3.11 |
| rc_AI176595_s_at | Y | T | 5 |  | 1358.6 | 42.511  | YT | 1.78E-08 | 4.18E-03 | 1.62E-09 |          | 2.35 | 1.23 | 3.11 |      |
| rc_AI176607_at   | O | C | 5 |  | 168.4  | 14.789  | OC |          | 7.19E-01 | 3.87E-02 | 1.04E-04 |      | 1.03 | 1.27 | 1.48 |
| rc_AI176607_at   | O | T | 5 |  | 174.2  | 9.721   | OT | 7.19E-01 |          | 1.86E-02 | 2.19E-04 | 1.03 |      | 1.31 | 1.43 |
| rc_AI176607_at   | Y | C | 5 |  | 132.9  | 7.824   | YC | 3.87E-02 | 1.86E-02 |          | 1.59E-06 | 1.27 | 1.31 |      | 1.87 |
| rc_AI176607_at   | Y | T | 5 |  | 249.0  | 11.088  | YT | 1.04E-04 | 2.19E-04 | 1.59E-06 |          | 1.48 | 1.43 | 1.87 |      |
| rc_AI176621_at   | O | C | 5 |  | 170.3  | 8.726   | OC |          | 2.66E-04 | 9.84E-01 | 8.88E-09 |      | 1.42 | 1.00 | 1.97 |
| rc_AI176621_at   | O | T | 5 |  | 241.3  | 9.826   | OT | 2.66E-04 |          | 2.55E-04 | 1.31E-05 | 1.42 |      | 1.42 | 1.39 |
| rc_AI176621_at   | Y | C | 5 |  | 170.0  | 4.344   | YC | 9.84E-01 | 2.55E-04 |          | 8.64E-09 | 1.00 | 1.42 |      | 1.98 |
| rc_AI176621_at   | Y | T | 5 |  | 335.7  | 16.570  | YT | 8.88E-09 | 1.31E-05 | 8.64E-09 |          | 1.97 | 1.39 | 1.98 |      |
| rc_AI176839_at   | O | C | 5 |  | 577.2  | 41.023  | OC |          | 6.10E-06 | 3.79E-01 | 2.08E-01 |      | 1.84 | 1.13 | 1.17 |
| rc_AI176839_at   | O | T | 5 |  | 1063.0 | 66.190  | OT | 6.10E-06 |          | 1.26E-06 | 7.33E-05 | 1.84 |      | 2.08 | 1.58 |
| rc_AI176839_at   | Y | C | 5 |  | 510.7  | 23.146  | YC | 3.79E-01 | 1.26E-06 |          | 4.16E-02 | 1.13 | 2.08 |      | 1.32 |
| rc_AI176839_at   | Y | T | 5 |  | 673.7  | 65.051  | YT | 2.08E-01 | 7.33E-05 | 4.16E-02 |          | 1.17 | 1.58 | 1.32 |      |
| rc_AI176961_at   | O | C | 5 |  | 763.2  | 14.212  | OC |          | 4.34E-04 | 1.92E-02 | 8.61E-06 |      | 1.56 | 1.21 | 2.08 |
| rc_AI176961_at   | O | T | 5 |  | 490.7  | 27.849  | OT | 4.34E-04 |          | 2.91E-06 | 6.32E-02 | 1.56 |      | 1.88 | 1.34 |

|                  |   |   |   |  |        |         |    |          |          |          |          |      |      |      |      |
|------------------|---|---|---|--|--------|---------|----|----------|----------|----------|----------|------|------|------|------|
| rc_AI176961_at   | Y | C | 5 |  | 923.9  | 79.607  | YC | 1.92E-02 | 2.91E-06 |          | 1.14E-07 | 1.21 | 1.88 |      | 2.51 |
| rc_AI176961_at   | Y | T | 5 |  | 367.4  | 17.519  | YT | 8.61E-06 | 6.32E-02 | 1.14E-07 |          | 2.08 | 1.34 | 2.51 |      |
| rc_AI177543_at   | O | C | 5 |  | 528.5  | 46.016  | OC |          | 2.36E-02 | 1.91E-04 | 8.52E-02 |      | 1.42 | 1.57 | 1.28 |
| rc_AI177543_at   | O | T | 5 |  | 372.9  | 46.486  | OT | 2.36E-02 |          | 1.73E-06 | 5.14E-01 | 1.42 |      | 2.22 | 1.11 |
| rc_AI177543_at   | Y | C | 5 |  | 827.8  | 39.780  | YC | 1.91E-04 | 1.73E-06 |          | 5.60E-06 | 1.57 | 2.22 |      | 2.00 |
| rc_AI177543_at   | Y | T | 5 |  | 414.4  | 43.260  | YT | 8.52E-02 | 5.14E-01 | 5.60E-06 |          | 1.28 | 1.11 | 2.00 |      |
| rc_AI177967_at   | O | C | 5 |  | 398.2  | 24.415  | OC |          | 1.07E-01 | 5.18E-07 | 2.74E-01 |      | 1.15 | 1.70 | 1.10 |
| rc_AI177967_at   | O | T | 5 |  | 457.8  | 34.004  | OT | 1.07E-01 |          | 9.94E-06 | 5.73E-01 | 1.15 |      | 1.48 | 1.05 |
| rc_AI177967_at   | Y | C | 5 |  | 678.6  | 18.518  | YC | 5.18E-07 | 9.94E-06 |          | 3.52E-06 | 1.70 | 1.48 |      | 1.55 |
| rc_AI177967_at   | Y | T | 5 |  | 437.7  | 18.334  | YT | 2.74E-01 | 5.73E-01 | 3.52E-06 |          | 1.10 | 1.05 | 1.55 |      |
| rc_AI178764_at   | O | C | 5 |  | 351.4  | 8.444   | OC |          | 1.25E-02 | 6.01E-03 | 5.54E-04 |      | 1.30 | 1.26 | 1.55 |
| rc_AI178764_at   | O | T | 5 |  | 270.2  | 23.207  | OT | 1.25E-02 |          | 1.93E-05 | 1.58E-01 | 1.30 |      | 1.64 | 1.19 |
| rc_AI178764_at   | Y | C | 5 |  | 442.8  | 27.214  | YC | 6.01E-03 | 1.93E-05 |          | 1.35E-06 | 1.26 | 1.64 |      | 1.95 |
| rc_AI178764_at   | Y | T | 5 |  | 227.4  | 17.784  | YT | 5.54E-04 | 1.58E-01 | 1.35E-06 |          | 1.55 | 1.19 | 1.95 |      |
| rc_AI178785_f_at | O | C | 5 |  | 6551.3 | 229.046 | OC |          | 3.01E-07 | 5.21E-11 | 5.57E-12 |      | 1.63 | 3.42 | 5.55 |
| rc_AI178785_f_at | O | T | 5 |  | 4027.0 | 327.438 | OT | 3.01E-07 |          | 2.98E-06 | 6.01E-08 | 1.63 |      | 2.10 | 3.41 |
| rc_AI178785_f_at | Y | C | 5 |  | 1917.8 | 96.086  | YC | 5.21E-11 | 2.98E-06 |          | 2.64E-02 | 3.42 | 2.10 |      | 1.62 |
| rc_AI178785_f_at | Y | T | 5 |  | 1181.4 | 111.647 | YT | 5.57E-12 | 6.01E-08 | 2.64E-02 |          | 5.55 | 3.41 | 1.62 |      |
| rc_AI179147_at   | O | C | 5 |  | 1587.8 | 72.440  | OC |          | 2.37E-02 | 2.21E-03 | 1.01E-04 |      | 1.23 | 1.27 | 1.61 |
| rc_AI179147_at   | O | T | 5 |  | 1295.2 | 99.358  | OT | 2.37E-02 |          | 1.43E-05 | 1.82E-02 | 1.23 |      | 1.55 | 1.31 |
| rc_AI179147_at   | Y | C | 5 |  | 2014.0 | 92.320  | YC | 2.21E-03 | 1.43E-05 |          | 1.65E-07 | 1.27 | 1.55 |      | 2.04 |
| rc_AI179147_at   | Y | T | 5 |  | 987.2  | 61.467  | YT | 1.01E-04 | 1.82E-02 | 1.65E-07 |          | 1.61 | 1.31 | 2.04 |      |
| rc_AI179840_at   | O | C | 5 |  | 402.1  | 16.692  | OC |          | 1.75E-03 | 4.69E-02 | 6.69E-06 |      | 1.32 | 1.23 | 1.56 |
| rc_AI179840_at   | O | T | 5 |  | 530.9  | 18.475  | OT | 1.75E-03 |          | 2.22E-05 | 1.29E-02 | 1.32 |      | 1.62 | 1.18 |
| rc_AI179840_at   | Y | C | 5 |  | 328.1  | 23.046  | YC | 4.69E-02 | 2.22E-05 |          | 1.83E-07 | 1.23 | 1.62 |      | 1.91 |
| rc_AI179840_at   | Y | T | 5 |  | 627.0  | 34.759  | YT | 6.69E-06 | 1.29E-02 | 1.83E-07 |          | 1.56 | 1.18 | 1.91 |      |
| rc_AI179984_at   | O | C | 5 |  | 559.2  | 42.031  | OC |          | 3.57E-01 | 1.01E-06 | 6.61E-03 |      | 1.15 | 2.22 | 1.50 |
| rc_AI179984_at   | O | T | 5 |  | 643.7  | 40.573  | OT | 3.57E-01 |          | 5.24E-06 | 4.53E-02 | 1.15 |      | 1.93 | 1.30 |
| rc_AI179984_at   | Y | C | 5 |  | 1239.9 | 89.357  | YC | 1.01E-06 | 5.24E-06 |          | 3.53E-04 | 2.22 | 1.93 |      | 1.48 |
| rc_AI179984_at   | Y | T | 5 |  | 837.3  | 67.159  | YT | 6.61E-03 | 4.53E-02 | 3.53E-04 |          | 1.50 | 1.30 | 1.48 |      |
| rc_AI180187_at   | O | C | 5 |  | 290.2  | 34.087  | OC |          | 7.00E-04 | 3.00E-01 | 7.61E-08 |      | 1.70 | 1.22 | 2.54 |
| rc_AI180187_at   | O | T | 5 |  | 492.2  | 44.763  | OT | 7.00E-04 |          | 7.83E-05 | 1.07E-04 | 1.70 |      | 2.06 | 1.50 |
| rc_AI180187_at   | Y | C | 5 |  | 238.5  | 10.954  | YC | 3.00E-01 | 7.83E-05 |          | 1.68E-08 | 1.22 | 2.06 |      | 3.10 |
| rc_AI180187_at   | Y | T | 5 |  | 738.5  | 37.068  | YT | 7.61E-08 | 1.07E-04 | 1.68E-08 |          | 2.54 | 1.50 | 3.10 |      |
| rc_AI227672_at   | O | C | 5 |  | 148.6  | 5.244   | OC |          | 4.76E-02 | 6.92E-01 | 2.96E-07 |      | 1.28 | 1.05 | 2.10 |
| rc_AI227672_at   | O | T | 5 |  | 190.2  | 14.267  | OT | 4.76E-02 |          | 1.01E-01 | 1.16E-05 | 1.28 |      | 1.22 | 1.64 |
| rc_AI227672_at   | Y | C | 5 |  | 156.4  | 12.871  | YC | 6.92E-01 | 1.01E-01 |          | 5.63E-07 | 1.05 | 1.22 |      | 1.99 |
| rc_AI227672_at   | Y | T | 5 |  | 311.5  | 18.872  | YT | 2.96E-07 | 1.16E-05 | 5.63E-07 |          | 2.10 | 1.64 | 1.99 |      |
| rc_AI228301_at   | O | C | 5 |  | 64.4   | 4.939   | OC |          | 6.55E-03 | 3.27E-05 | 7.67E-04 |      | 1.60 | 1.68 | 1.99 |
| rc_AI228301_at   | O | T | 5 |  | 40.2   | 3.491   | OT | 6.55E-03 |          | 1.51E-07 | 3.24E-01 | 1.60 |      | 2.69 | 1.24 |
| rc_AI228301_at   | Y | C | 5 |  | 108.4  | 8.555   | YC | 3.27E-05 | 1.51E-07 |          | 3.42E-08 | 1.68 | 2.69 |      | 3.35 |
| rc_AI228301_at   | Y | T | 5 |  | 32.4   | 3.082   | YT | 7.67E-04 | 3.24E-01 | 3.42E-08 |          | 1.99 | 1.24 | 3.35 |      |
| rc_AI228484_at   | O | C | 5 |  | 149.1  | 13.051  | OC |          | 1.72E-03 | 2.05E-01 | 3.94E-07 |      | 1.53 | 1.23 | 2.15 |
| rc_AI228484_at   | O | T | 5 |  | 227.7  | 10.009  | OT | 1.72E-03 |          | 1.12E-04 | 4.00E-04 | 1.53 |      | 1.88 | 1.41 |
| rc_AI228484_at   | Y | C | 5 |  | 121.4  | 7.159   | YC | 2.05E-01 | 1.12E-04 |          | 5.33E-08 | 1.23 | 1.88 |      | 2.64 |



|                  |   |   |   |  |        |         |    |          |          |          |          |       |       |       |      |
|------------------|---|---|---|--|--------|---------|----|----------|----------|----------|----------|-------|-------|-------|------|
| rc_AI228484_at   | Y | T | 5 |  | 320.9  | 23.536  | YT | 3.94E-07 | 4.00E-04 | 5.33E-08 |          | 2.15  | 1.41  | 2.64  |      |
| rc_AI229253_at   | O | C | 5 |  | 258.5  | 19.064  | OC |          | 1.43E-02 | 3.95E-01 | 1.24E-07 |       | 1.33  | 1.10  | 2.06 |
| rc_AI229253_at   | O | T | 5 |  | 342.6  | 29.944  | OT | 1.43E-02 |          | 7.94E-02 | 1.24E-05 | 1.33  |       | 1.20  | 1.56 |
| rc_AI229253_at   | Y | C | 5 |  | 285.2  | 19.471  | YC | 3.95E-01 | 7.94E-02 |          | 4.81E-07 | 1.10  | 1.20  |       | 1.87 |
| rc_AI229253_at   | Y | T | 5 |  | 532.8  | 15.349  | YT | 1.24E-07 | 1.24E-05 | 4.81E-07 |          | 2.06  | 1.56  | 1.87  |      |
| rc_AI229440_s_at | O | C | 5 |  | 773.5  | 30.879  | OC |          | 1.34E-05 | 7.79E-03 | 1.82E-01 |       | 1.37  | 1.22  | 1.09 |
| rc_AI229440_s_at | O | T | 5 |  | 1058.8 | 31.993  | OT | 1.34E-05 |          | 8.48E-08 | 1.13E-06 | 1.37  |       | 1.67  | 1.49 |
| rc_AI229440_s_at | Y | C | 5 |  | 632.9  | 42.673  | YC | 7.79E-03 | 8.48E-08 |          | 1.19E-01 | 1.22  | 1.67  |       | 1.12 |
| rc_AI229440_s_at | Y | T | 5 |  | 709.1  | 21.808  | YT | 1.82E-01 | 1.13E-06 | 1.19E-01 |          | 1.09  | 1.49  | 1.12  |      |
| rc_AI229497_at   | O | C | 5 |  | 1091.2 | 25.962  | OC |          | 4.34E-02 | 1.38E-01 | 7.04E-05 |       | 1.18  | 1.11  | 1.57 |
| rc_AI229497_at   | O | T | 5 |  | 927.6  | 40.970  | OT | 4.34E-02 |          | 1.72E-03 | 6.65E-03 | 1.18  |       | 1.30  | 1.33 |
| rc_AI229497_at   | Y | C | 5 |  | 1207.7 | 81.694  | YC | 1.38E-01 | 1.72E-03 |          | 3.75E-06 | 1.11  | 1.30  |       | 1.74 |
| rc_AI229497_at   | Y | T | 5 |  | 695.2  | 45.784  | YT | 7.04E-05 | 6.65E-03 | 3.75E-06 |          | 1.57  | 1.33  | 1.74  |      |
| rc_AI229620_s_at | O | C | 5 |  | 3742.7 | 181.785 | OC |          | 1.93E-03 | 5.84E-01 | 1.11E-06 |       | 1.26  | 1.03  | 1.74 |
| rc_AI229620_s_at | O | T | 5 |  | 2962.8 | 135.914 | OT | 1.93E-03 |          | 5.97E-04 | 1.34E-03 | 1.26  |       | 1.30  | 1.38 |
| rc_AI229620_s_at | Y | C | 5 |  | 3860.3 | 162.275 | YC | 5.84E-01 | 5.97E-04 |          | 4.43E-07 | 1.03  | 1.30  |       | 1.80 |
| rc_AI229620_s_at | Y | T | 5 |  | 2146.2 | 104.232 | YT | 1.11E-06 | 1.34E-03 | 4.43E-07 |          | 1.74  | 1.38  | 1.80  |      |
| rc_AI229680_at   | O | C | 5 |  | 1466.4 | 96.445  | OC |          | 2.77E-03 | 3.42E-04 | 1.22E-04 |       | 1.31  | 1.30  | 1.50 |
| rc_AI229680_at   | O | T | 5 |  | 1122.6 | 73.107  | OT | 2.77E-03 |          | 5.02E-07 | 1.52E-01 | 1.31  |       | 1.70  | 1.15 |
| rc_AI229680_at   | Y | C | 5 |  | 1907.2 | 46.733  | YC | 3.42E-04 | 5.02E-07 |          | 5.08E-08 | 1.30  | 1.70  |       | 1.95 |
| rc_AI229680_at   | Y | T | 5 |  | 976.2  | 45.985  | YT | 1.22E-04 | 1.52E-01 | 5.08E-08 |          | 1.50  | 1.15  | 1.95  |      |
| rc_AI229849_at   | O | C | 5 |  | 1115.8 | 43.136  | OC |          | 5.68E-08 | 8.64E-04 | 1.25E-08 |       | 1.60  | 1.16  | 1.72 |
| rc_AI229849_at   | O | T | 5 |  | 697.6  | 25.330  | OT | 5.68E-08 |          | 3.39E-10 | 2.92E-01 | 1.60  |       | 1.86  | 1.07 |
| rc_AI229849_at   | Y | C | 5 |  | 1295.9 | 32.820  | YC | 8.64E-04 | 3.39E-10 |          | 1.08E-10 | 1.16  | 1.86  |       | 1.99 |
| rc_AI229849_at   | Y | T | 5 |  | 649.6  | 17.506  | YT | 1.25E-08 | 2.92E-01 | 1.08E-10 |          | 1.72  | 1.07  | 1.99  |      |
| rc_AI230199_f_at | O | C | 5 |  | 153.3  | 10.197  | OC |          | 7.41E-09 | 5.39E-02 | 9.12E-01 |       | 2.05  | 1.25  | 1.01 |
| rc_AI230199_f_at | O | T | 5 |  | 313.8  | 12.844  | OT | 7.41E-09 |          | 6.01E-10 | 6.41E-09 | 2.05  |       | 2.55  | 2.07 |
| rc_AI230199_f_at | Y | C | 5 |  | 122.9  | 8.338   | YC | 5.39E-02 | 6.01E-10 |          | 6.66E-02 | 1.25  | 2.55  |       | 1.23 |
| rc_AI230199_f_at | Y | T | 5 |  | 151.7  | 9.440   | YT | 9.12E-01 | 6.41E-09 | 6.66E-02 |          | 1.01  | 2.07  | 1.23  |      |
| rc_AI230208_at   | O | C | 5 |  | 351.8  | 16.317  | OC |          | 3.49E-04 | 2.86E-05 | 4.69E-03 |       | 1.41  | 1.37  | 1.27 |
| rc_AI230208_at   | O | T | 5 |  | 248.7  | 16.284  | OT | 3.49E-04 |          | 1.84E-08 | 2.34E-01 | 1.41  |       | 1.94  | 1.11 |
| rc_AI230208_at   | Y | C | 5 |  | 483.4  | 17.512  | YC | 2.86E-05 | 1.84E-08 |          | 1.07E-07 | 1.37  | 1.94  |       | 1.75 |
| rc_AI230208_at   | Y | T | 5 |  | 276.9  | 14.214  | YT | 4.69E-03 | 2.34E-01 | 1.07E-07 |          | 1.27  | 1.11  | 1.75  |      |
| rc_AI230220_at   | O | C | 5 |  | 4013.3 | 250.322 | OC |          | 3.99E-10 | 1.42E-06 | 1.64E-10 |       | 8.80  | 1.49  | ###  |
| rc_AI230220_at   | O | T | 5 |  | 455.8  | 39.375  | OT | 3.99E-10 |          | 5.01E-13 | 4.18E-01 | 8.80  |       | 13.13 | 1.94 |
| rc_AI230220_at   | Y | C | 5 |  | 5982.7 | 276.053 | YC | 1.42E-06 | 5.01E-13 |          | 2.73E-13 | 1.49  | 13.13 |       | ###  |
| rc_AI230220_at   | Y | T | 5 |  | 235.5  | 5.535   | YT | 1.64E-10 | 4.18E-01 | 2.73E-13 |          | ###   | 1.94  | ###   |      |
| rc_AI231292_at   | O | C | 5 |  | 2834.6 | 41.337  | OC |          | 7.94E-10 | 3.36E-04 | 1.17E-10 |       | 1.62  | 1.28  | 1.71 |
| rc_AI231292_at   | O | T | 5 |  | 4598.7 | 82.623  | OT | 7.94E-10 |          | 8.47E-12 | 9.56E-02 | 1.62  |       | 2.08  | 1.05 |
| rc_AI231292_at   | Y | C | 5 |  | 2209.6 | 120.007 | YC | 3.36E-04 | 8.47E-12 |          | 1.91E-12 | 1.28  | 2.08  |       | 2.19 |
| rc_AI231292_at   | Y | T | 5 |  | 4842.6 | 122.453 | YT | 1.17E-10 | 9.56E-02 | 1.91E-12 |          | 1.71  | 1.05  | 2.19  |      |
| rc_AI231472_s_at | O | C | 5 |  | 440.6  | 16.575  | OC |          | 8.33E-01 | 1.25E-06 | 1.17E-01 |       | 1.37  | 10.41 | 3.08 |
| rc_AI231472_s_at | O | T | 5 |  | 322.3  | 59.641  | OT | 8.33E-01 |          | 8.75E-07 | 7.97E-02 | 1.37  |       | ###   | 4.21 |
| rc_AI231472_s_at | Y | C | 5 |  | 4585.1 | 726.028 | YC | 1.25E-06 | 8.75E-07 |          | 2.46E-05 | 10.41 | ###   |       | 3.38 |
| rc_AI231472_s_at | Y | T | 5 |  | 1355.3 | 280.325 | YT | 1.17E-01 | 7.97E-02 | 2.46E-05 |          | 3.08  | 4.21  | 3.38  |      |

|                  |   |   |   |  |        |         |    |          |          |          |          |      |      |      |      |
|------------------|---|---|---|--|--------|---------|----|----------|----------|----------|----------|------|------|------|------|
| rc_AI232313_at   | O | C | 5 |  | 241.8  | 8.778   | OC |          | 4.83E-03 | 2.55E-01 | 1.44E-06 |      | 1.30 | 1.12 | 1.67 |
| rc_AI232313_at   | O | T | 5 |  | 313.5  | 8.883   | OT | 4.83E-03 |          | 4.05E-04 | 7.42E-04 | 1.30 |      | 1.45 | 1.29 |
| rc_AI232313_at   | Y | C | 5 |  | 215.9  | 14.653  | YC | 2.55E-01 | 4.05E-04 |          | 2.13E-07 | 1.12 | 1.45 |      | 1.87 |
| rc_AI232313_at   | Y | T | 5 |  | 404.7  | 24.331  | YT | 1.44E-06 | 7.42E-04 | 2.13E-07 |          | 1.67 | 1.29 | 1.87 |      |
| rc_AI232783_s_at | O | C | 5 |  | 1521.5 | 73.621  | OC |          | 2.07E-03 | 9.59E-01 | 1.42E-08 |      | 1.58 | 1.01 | 2.66 |
| rc_AI232783_s_at | O | T | 5 |  | 2406.9 | 89.153  | OT | 2.07E-03 |          | 2.31E-03 | 4.17E-06 | 1.58 |      | 1.57 | 1.68 |
| rc_AI232783_s_at | Y | C | 5 |  | 1534.2 | 123.894 | YC | 9.59E-01 | 2.31E-03 |          | 1.52E-08 | 1.01 | 1.57 |      | 2.64 |
| rc_AI232783_s_at | Y | T | 5 |  | 4050.3 | 296.070 | YT | 1.42E-08 | 4.17E-06 | 1.52E-08 |          | 2.66 | 1.68 | 2.64 |      |
| rc_AI232900_at   | O | C | 5 |  | 150.1  | 11.498  | OC |          | 5.72E-03 | 4.74E-07 | 3.92E-04 |      | 1.38 | 1.96 | 1.53 |
| rc_AI232900_at   | O | T | 5 |  | 206.7  | 11.516  | OT | 5.72E-03 |          | 1.57E-04 | 2.20E-01 | 1.38 |      | 1.42 | 1.11 |
| rc_AI232900_at   | Y | C | 5 |  | 293.9  | 14.320  | YC | 4.74E-07 | 1.57E-04 |          | 2.24E-03 | 1.96 | 1.42 |      | 1.28 |
| rc_AI232900_at   | Y | T | 5 |  | 229.4  | 12.685  | YT | 3.92E-04 | 2.20E-01 | 2.24E-03 |          | 1.53 | 1.11 | 1.28 |      |
| rc_AI232903_at   | O | C | 5 |  | 1498.2 | 60.599  | OC |          | 7.86E-02 | 3.82E-02 | 5.59E-05 |      | 1.12 | 1.12 | 1.43 |
| rc_AI232903_at   | O | T | 5 |  | 1343.2 | 60.964  | OT | 7.86E-02 |          | 7.71E-04 | 2.68E-03 | 1.12 |      | 1.25 | 1.28 |
| rc_AI232903_at   | Y | C | 5 |  | 1684.5 | 44.426  | YC | 3.82E-02 | 7.71E-04 |          | 9.28E-07 | 1.12 | 1.25 |      | 1.60 |
| rc_AI232903_at   | Y | T | 5 |  | 1050.6 | 65.108  | YT | 5.59E-05 | 2.68E-03 | 9.28E-07 |          | 1.43 | 1.28 | 1.60 |      |
| rc_AI232948_at   | O | C | 5 |  | 901.1  | 26.625  | OC |          | 3.33E-01 | 4.35E-05 | 1.44E-01 |      | 1.06 | 1.33 | 1.10 |
| rc_AI232948_at   | O | T | 5 |  | 848.1  | 21.100  | OT | 3.33E-01 |          | 6.65E-06 | 5.97E-01 | 1.06 |      | 1.41 | 1.03 |
| rc_AI232948_at   | Y | C | 5 |  | 1196.1 | 32.074  | YC | 4.35E-05 | 6.65E-06 |          | 2.55E-06 | 1.33 | 1.41 |      | 1.46 |
| rc_AI232948_at   | Y | T | 5 |  | 819.4  | 58.793  | YT | 1.44E-01 | 5.97E-01 | 2.55E-06 |          | 1.10 | 1.03 | 1.46 |      |
| rc_AI233054_at   | O | C | 5 |  | 4088.2 | 155.132 | OC |          | 1.82E-02 | 2.86E-04 | 3.08E-05 |      | 1.23 | 1.33 | 1.71 |
| rc_AI233054_at   | O | T | 5 |  | 3312.9 | 267.781 | OT | 1.82E-02 |          | 1.96E-06 | 6.83E-03 | 1.23 |      | 1.64 | 1.38 |
| rc_AI233054_at   | Y | C | 5 |  | 5449.6 | 187.034 | YC | 2.86E-04 | 1.96E-06 |          | 1.70E-08 | 1.33 | 1.64 |      | 2.27 |
| rc_AI233054_at   | Y | T | 5 |  | 2397.7 | 207.784 | YT | 3.08E-05 | 6.83E-03 | 1.70E-08 |          | 1.71 | 1.38 | 2.27 |      |
| rc_AI233787_at   | O | C | 5 |  | 122.5  | 12.983  | OC |          | 2.08E-03 | 8.08E-01 | 8.60E-07 |      | 1.67 | 1.05 | 2.42 |
| rc_AI233787_at   | O | T | 5 |  | 204.9  | 23.056  | OT | 2.08E-03 |          | 1.23E-03 | 9.03E-04 | 1.67 |      | 1.75 | 1.45 |
| rc_AI233787_at   | Y | C | 5 |  | 116.9  | 8.074   | YC | 8.08E-01 | 1.23E-03 |          | 5.73E-07 | 1.05 | 1.75 |      | 2.53 |
| rc_AI233787_at   | Y | T | 5 |  | 296.2  | 15.627  | YT | 8.60E-07 | 9.03E-04 | 5.73E-07 |          | 2.42 | 1.45 | 2.53 |      |
| rc_AI234218_at   | O | C | 5 |  | 103.5  | 13.042  | OC |          | 7.38E-04 | 9.71E-01 | 2.46E-07 |      | 1.99 | 1.01 | 3.03 |
| rc_AI234218_at   | O | T | 5 |  | 206.4  | 23.071  | OT | 7.38E-04 |          | 6.83E-04 | 4.96E-04 | 1.99 |      | 2.01 | 1.52 |
| rc_AI234218_at   | Y | C | 5 |  | 102.6  | 2.846   | YC | 9.71E-01 | 6.83E-04 |          | 2.33E-07 | 1.01 | 2.01 |      | 3.06 |
| rc_AI234218_at   | Y | T | 5 |  | 313.9  | 22.621  | YT | 2.46E-07 | 4.96E-04 | 2.33E-07 |          | 3.03 | 1.52 | 3.06 |      |
| rc_AI234712_at   | O | C | 5 |  | 331.1  | 10.722  | OC |          | 2.97E-03 | 8.13E-01 | 1.51E-09 |      | 1.54 | 1.04 | 2.88 |
| rc_AI234712_at   | O | T | 5 |  | 508.4  | 33.067  | OT | 2.97E-03 |          | 1.79E-03 | 1.68E-07 | 1.54 |      | 1.59 | 1.87 |
| rc_AI234712_at   | Y | C | 5 |  | 319.0  | 29.140  | YC | 8.13E-01 | 1.79E-03 |          | 1.14E-09 | 1.04 | 1.59 |      | 2.99 |
| rc_AI234712_at   | Y | T | 5 |  | 952.2  | 55.472  | YT | 1.51E-09 | 1.68E-07 | 1.14E-09 |          | 2.88 | 1.87 | 2.99 |      |
| rc_AI235250_at   | O | C | 5 |  | 320.2  | 14.203  | OC |          | 4.82E-08 | 9.70E-09 | 9.60E-11 |      | 2.21 | 2.59 | 6.36 |
| rc_AI235250_at   | O | T | 5 |  | 144.8  | 19.833  | OT | 4.82E-08 |          | 2.60E-01 | 9.27E-05 | 2.21 |      | 1.17 | 2.87 |
| rc_AI235250_at   | Y | C | 5 |  | 123.5  | 6.800   | YC | 9.70E-09 | 2.60E-01 |          | 1.02E-03 | 2.59 | 1.17 |      | 2.45 |
| rc_AI235250_at   | Y | T | 5 |  | 50.4   | 5.085   | YT | 9.60E-11 | 9.27E-05 | 1.02E-03 |          | 6.36 | 2.87 | 2.45 |      |
| rc_AI235481_f_at | O | C | 5 |  | 298.5  | 14.538  | OC |          | 1.39E-06 | 2.58E-03 | 5.80E-01 |      | 1.72 | 1.53 | 1.06 |
| rc_AI235481_f_at | O | T | 5 |  | 514.9  | 25.609  | OT | 1.39E-06 |          | 7.07E-09 | 5.45E-07 | 1.72 |      | 2.64 | 1.83 |
| rc_AI235481_f_at | Y | C | 5 |  | 194.9  | 27.691  | YC | 2.58E-03 | 7.07E-09 |          | 8.46E-03 | 1.53 | 2.64 |      | 1.45 |
| rc_AI235481_f_at | Y | T | 5 |  | 282.1  | 7.382   | YT | 5.80E-01 | 5.45E-07 | 8.46E-03 |          | 1.06 | 1.83 | 1.45 |      |
| rc_AI235893_at   | O | C | 5 |  | 572.9  | 36.181  | OC |          | 6.45E-01 | 6.85E-07 | 3.01E-02 |      | 1.09 | 2.32 | 1.40 |

|                  |   |   |   |  |        |         |    |          |          |          |          |      |      |      |      |
|------------------|---|---|---|--|--------|---------|----|----------|----------|----------|----------|------|------|------|------|
| rc_AI235893_at   | O | T | 5 |  | 527.6  | 37.702  | OT | 6.45E-01 |          | 3.22E-07 | 1.16E-02 | 1.09 |      | 2.52 | 1.52 |
| rc_AI235893_at   | Y | C | 5 |  | 1331.6 | 105.179 | YC | 6.85E-07 | 3.22E-07 |          | 4.94E-05 | 2.32 | 2.52 |      | 1.66 |
| rc_AI235893_at   | Y | T | 5 |  | 802.4  | 69.218  | YT | 3.01E-02 | 1.16E-02 | 4.94E-05 |          | 1.40 | 1.52 | 1.66 |      |
| rc_AI235948_s_at | O | C | 5 |  | 212.4  | 19.471  | OC |          | 2.80E-01 | 2.53E-06 | 2.66E-01 |      | 1.16 | 1.88 | 1.17 |
| rc_AI235948_s_at | O | T | 5 |  | 182.9  | 14.318  | OT | 2.80E-01 |          | 3.93E-07 | 9.73E-01 | 1.16 |      | 2.19 | 1.00 |
| rc_AI235948_s_at | Y | C | 5 |  | 400.0  | 27.773  | YC | 2.53E-06 | 3.93E-07 |          | 3.73E-07 | 1.88 | 2.19 |      | 2.20 |
| rc_AI235948_s_at | Y | T | 5 |  | 182.0  | 6.471   | YT | 2.66E-01 | 9.73E-01 | 3.73E-07 |          | 1.17 | 1.00 |      | 2.20 |
| rc_AI236039_f_at | O | C | 5 |  | 305.2  | 15.207  | OC |          | 3.77E-01 | 8.73E-06 | 8.92E-01 |      | 1.06 | 1.41 | 1.01 |
| rc_AI236039_f_at | O | T | 5 |  | 287.5  | 4.466   | OT | 3.77E-01 |          | 1.74E-06 | 3.11E-01 | 1.06 |      | 1.50 | 1.07 |
| rc_AI236039_f_at | Y | C | 5 |  | 430.0  | 15.800  | YC | 8.73E-06 | 1.74E-06 |          | 1.12E-05 | 1.41 | 1.50 |      | 1.40 |
| rc_AI236039_f_at | Y | T | 5 |  | 307.9  | 16.084  | YT | 8.92E-01 | 3.11E-01 | 1.12E-05 |          | 1.01 | 1.07 | 1.40 |      |
| rc_AI236726_at   | O | C | 5 |  | 951.4  | 52.595  | OC |          | 6.11E-04 | 6.76E-05 | 2.31E-05 |      | 1.58 | 1.46 | 2.04 |
| rc_AI236726_at   | O | T | 5 |  | 601.7  | 72.703  | OT | 6.11E-04 |          | 4.97E-08 | 1.22E-01 | 1.58 |      | 2.31 | 1.29 |
| rc_AI236726_at   | Y | C | 5 |  | 1390.1 | 66.531  | YC | 6.76E-05 | 4.97E-08 |          | 5.45E-09 | 1.46 | 2.31 |      | 2.98 |
| rc_AI236726_at   | Y | T | 5 |  | 467.2  | 32.641  | YT | 2.31E-05 | 1.22E-01 | 5.45E-09 |          | 2.04 | 1.29 | 2.98 |      |
| rc_AI237645_at   | O | C | 5 |  | 187.2  | 22.771  | OC |          | 4.75E-01 | 1.12E-07 | 8.09E-01 |      | 1.44 | 4.74 | 1.10 |
| rc_AI237645_at   | O | T | 5 |  | 130.4  | 16.171  | OT | 4.75E-01 |          | 3.87E-08 | 3.43E-01 | 1.44 |      | 6.81 | 1.58 |
| rc_AI237645_at   | Y | C | 5 |  | 887.5  | 104.471 | YC | 1.12E-07 | 3.87E-08 |          | 1.63E-07 | 4.74 | 6.81 |      | 4.30 |
| rc_AI237645_at   | Y | T | 5 |  | 206.3  | 18.747  | YT | 8.09E-01 | 3.43E-01 | 1.63E-07 |          | 1.10 | 1.58 | 4.30 |      |
| rc_AI639532_at   | O | C | 5 |  | 3093.0 | 246.193 | OC |          | 1.80E-02 | 2.05E-02 | 7.06E-05 |      | 1.40 | 1.65 | 1.81 |
| rc_AI639532_at   | O | T | 5 |  | 4340.7 | 235.180 | OT | 1.80E-02 |          | 8.66E-05 | 1.66E-02 | 1.40 |      | 2.31 | 1.29 |
| rc_AI639532_at   | Y | C | 5 |  | 1875.4 | 415.378 | YC | 2.05E-02 | 8.66E-05 |          | 6.75E-07 | 1.65 | 2.31 |      | 2.99 |
| rc_AI639532_at   | Y | T | 5 |  | 5606.9 | 400.055 | YT | 7.06E-05 | 1.66E-02 | 6.75E-07 |          | 1.81 | 1.29 | 2.99 |      |
| S68736_at        | O | C | 5 |  | 361.9  | 72.035  | OC |          | 5.88E-04 | 7.64E-02 | 7.93E-09 |      | 2.76 | 4.61 | 5.52 |
| S68736_at        | O | T | 5 |  | 1000.6 | 82.075  | OT | 5.88E-04 |          | 1.36E-05 | 5.53E-06 | 2.76 |      | ###  | 2.00 |
| S68736_at        | Y | C | 5 |  | 78.5   | 15.995  | YC | 7.64E-02 | 1.36E-05 |          | 7.87E-10 | 4.61 | ###  |      | ###  |
| S68736_at        | Y | T | 5 |  | 1996.4 | 180.535 | YT | 7.93E-09 | 5.53E-06 | 7.87E-10 |          | 5.52 | 2.00 | ###  |      |
| S77858_s_at      | O | C | 5 |  | 536.2  | 24.559  | OC |          | 6.21E-01 | 4.60E-07 | 5.19E-03 |      | 1.04 | 1.57 | 1.23 |
| S77858_s_at      | O | T | 5 |  | 517.1  | 14.815  | OT | 6.21E-01 |          | 2.08E-07 | 1.79E-03 | 1.04 |      | 1.63 | 1.27 |
| S77858_s_at      | Y | C | 5 |  | 843.1  | 26.544  | YC | 4.60E-07 | 2.08E-07 |          | 1.66E-04 | 1.57 | 1.63 |      | 1.28 |
| S77858_s_at      | Y | T | 5 |  | 658.5  | 36.505  | YT | 5.19E-03 | 1.79E-03 | 1.66E-04 |          | 1.23 | 1.27 | 1.28 |      |
| U05784_s_at      | O | C | 5 |  | 622.4  | 25.382  | OC |          | 1.13E-02 | 8.39E-01 | 1.02E-06 |      | 1.50 | 1.04 | 2.33 |
| U05784_s_at      | O | T | 5 |  | 932.8  | 43.365  | OT | 1.13E-02 |          | 1.72E-02 | 2.11E-04 | 1.50 |      | 1.45 | 1.55 |
| U05784_s_at      | Y | C | 5 |  | 644.8  | 67.732  | YC | 8.39E-01 | 1.72E-02 |          | 1.45E-06 | 1.04 | 1.45 |      | 2.25 |
| U05784_s_at      | Y | T | 5 |  | 1449.2 | 128.024 | YT | 1.02E-06 | 2.11E-04 | 1.45E-06 |          | 2.33 | 1.55 | 2.25 |      |
| U06099_at        | O | C | 5 |  | 1042.7 | 18.880  | OC |          | 1.66E-04 | 3.24E-03 | 1.61E-05 |      | 1.43 | 1.21 | 1.59 |
| U06099_at        | O | T | 5 |  | 730.4  | 28.780  | OT | 1.66E-04 |          | 3.22E-07 | 2.51E-01 | 1.43 |      | 1.73 | 1.12 |
| U06099_at        | Y | C | 5 |  | 1264.0 | 77.877  | YC | 3.24E-03 | 3.22E-07 |          | 5.33E-08 | 1.21 | 1.73 |      | 1.93 |
| U06099_at        | Y | T | 5 |  | 654.1  | 30.628  | YT | 1.61E-05 | 2.51E-01 | 5.33E-08 |          | 1.59 | 1.12 | 1.93 |      |
| U23769_at        | O | C | 5 |  | 1206.4 | 68.190  | OC |          | 7.07E-03 | 7.46E-06 | 9.53E-05 |      | 1.50 | 1.70 | 2.24 |
| U23769_at        | O | T | 5 |  | 806.6  | 68.212  | OT | 7.07E-03 |          | 4.99E-08 | 5.49E-02 | 1.50 |      | 2.54 | 1.50 |
| U23769_at        | Y | C | 5 |  | 2046.8 | 152.769 | YC | 7.46E-06 | 4.99E-08 |          | 3.16E-09 | 1.70 | 2.54 |      | 3.80 |
| U23769_at        | Y | T | 5 |  | 538.4  | 29.913  | YT | 9.53E-05 | 5.49E-02 | 3.16E-09 |          | 2.24 | 1.50 | 3.80 |      |
| U25746_at        | O | C | 5 |  | 99.9   | 6.401   | OC |          | 6.00E-04 | 1.82E-01 | 3.08E-07 |      | 1.33 | 1.12 | 1.65 |
| U25746_at        | O | T | 5 |  | 132.8  | 5.657   | OT | 6.00E-04 |          | 3.60E-05 | 8.21E-04 | 1.33 |      | 1.49 | 1.24 |

|                  |   |   |   |  |         |         |    |          |          |          |          |      |      |      |      |
|------------------|---|---|---|--|---------|---------|----|----------|----------|----------|----------|------|------|------|------|
| U25746_at        | Y | C | 5 |  | 89.1    | 3.979   | YC | 1.82E-01 | 3.60E-05 |          | 3.84E-08 | 1.12 | 1.49 |      | 1.85 |
| U25746_at        | Y | T | 5 |  | 164.6   | 5.553   | YT | 3.08E-07 | 8.21E-04 | 3.84E-08 |          | 1.65 | 1.24 | 1.85 |      |
| U38253_at        | O | C | 5 |  | 102.0   | 4.079   | OC |          | 8.56E-04 | 4.46E-03 | 2.54E-05 |      | 1.25 | 1.26 | 1.36 |
| U38253_at        | O | T | 5 |  | 128.0   | 5.009   | OT | 8.56E-04 |          | 1.51E-06 | 1.00E-01 | 1.25 |      | 1.58 | 1.09 |
| U38253_at        | Y | C | 5 |  | 81.0    | 3.250   | YC | 4.46E-03 | 1.51E-06 |          | 9.45E-08 | 1.26 | 1.58 |      | 1.72 |
| U38253_at        | Y | T | 5 |  | 139.1   | 5.345   | YT | 2.54E-05 | 1.00E-01 | 9.45E-08 |          | 1.36 | 1.09 | 1.72 |      |
| U40836mRNA_s_at  | O | C | 5 |  | 7656.5  | 403.104 | OC |          | 2.16E-04 | 5.36E-01 | 1.65E-08 |      | 1.43 | 1.04 | 2.89 |
| U40836mRNA_s_at  | O | T | 5 |  | 5360.8  | 348.984 | OT | 2.16E-04 |          | 6.06E-05 | 3.84E-05 | 1.43 |      | 1.49 | 2.03 |
| U40836mRNA_s_at  | Y | C | 5 |  | 7962.0  | 375.608 | YC | 5.36E-01 | 6.06E-05 |          | 7.13E-09 | 1.04 | 1.49 |      | 3.01 |
| U40836mRNA_s_at  | Y | T | 5 |  | 2646.9  | 202.836 | YT | 1.65E-08 | 3.84E-05 | 7.13E-09 |          | 2.89 | 2.03 | 3.01 |      |
| U48828_g_at      | O | C | 5 |  | 233.9   | 28.760  | OC |          | 6.86E-07 | 1.27E-01 | 3.02E-01 |      | 2.75 | 1.56 | 1.24 |
| U48828_g_at      | O | T | 5 |  | 643.4   | 63.039  | OT | 6.86E-07 |          | 5.76E-08 | 4.25E-06 | 2.75 |      | 4.29 | 2.22 |
| U48828_g_at      | Y | C | 5 |  | 150.1   | 8.044   | YC | 1.27E-01 | 5.76E-08 |          | 1.65E-02 | 1.56 | 4.29 |      | 1.93 |
| U48828_g_at      | Y | T | 5 |  | 289.4   | 23.448  | YT | 3.02E-01 | 4.25E-06 | 1.65E-02 |          | 1.24 | 2.22 | 1.93 |      |
| U57050_g_at      | O | C | 5 |  | 1280.3  | 55.971  | OC |          | 6.98E-03 | 1.27E-02 | 3.04E-04 |      | 1.27 | 1.33 | 1.40 |
| U57050_g_at      | O | T | 5 |  | 1627.3  | 111.772 | OT | 6.98E-03 |          | 2.24E-05 | 1.55E-01 | 1.27 |      | 1.69 | 1.10 |
| U57050_g_at      | Y | C | 5 |  | 965.5   | 22.941  | YC | 1.27E-02 | 2.24E-05 |          | 1.52E-06 | 1.33 | 1.69 |      | 1.86 |
| U57050_g_at      | Y | T | 5 |  | 1794.9  | 94.958  | YT | 3.04E-04 | 1.55E-01 | 1.52E-06 |          | 1.40 | 1.10 | 1.86 |      |
| U59241_at        | O | C | 5 |  | 261.3   | 19.643  | OC |          | 8.13E-02 | 8.74E-02 | 1.31E-05 |      | 1.32 | 1.45 | 2.05 |
| U59241_at        | O | T | 5 |  | 344.0   | 34.905  | OT | 8.13E-02 |          | 2.02E-03 | 5.25E-04 | 1.32 |      | 1.91 | 1.56 |
| U59241_at        | Y | C | 5 |  | 180.5   | 9.428   | YC | 8.74E-02 | 2.02E-03 |          | 5.51E-07 | 1.45 | 1.91 |      | 2.97 |
| U59241_at        | Y | T | 5 |  | 536.0   | 47.466  | YT | 1.31E-05 | 5.25E-04 | 5.51E-07 |          | 2.05 | 1.56 | 2.97 |      |
| U69272_at        | O | C | 5 |  | 75.8    | 5.196   | OC |          | 5.49E-03 | 2.05E-01 | 1.25E-08 |      | 1.94 | 1.39 | 4.09 |
| U69272_at        | O | T | 5 |  | 146.6   | 7.619   | OT | 5.49E-03 |          | 7.77E-02 | 1.58E-06 | 1.94 |      | 1.40 | 2.11 |
| U69272_at        | Y | C | 5 |  | 105.0   | 18.397  | YC | 2.05E-01 | 7.77E-02 |          | 7.95E-08 | 1.39 | 1.40 |      | 2.95 |
| U69272_at        | Y | T | 5 |  | 309.5   | 23.519  | YT | 1.25E-08 | 1.58E-06 | 7.95E-08 |          | 4.09 | 2.11 | 2.95 |      |
| U75405UTR#1_f_at | O | C | 5 |  | 751.5   | 78.108  | OC |          | 1.90E-01 | 2.28E-12 | 1.56E-07 |      | 1.41 | 5.01 | 2.87 |
| U75405UTR#1_f_at | O | T | 5 |  | 533.7   | 102.009 | OT | 1.90E-01 |          | 7.79E-13 | 2.16E-08 | 1.41 |      | 7.05 | 4.04 |
| U75405UTR#1_f_at | Y | C | 5 |  | 3761.4  | 107.923 | YC | 2.28E-12 | 7.79E-13 |          | 2.42E-08 | 5.01 | 7.05 |      | 1.75 |
| U75405UTR#1_f_at | Y | T | 5 |  | 2154.1  | 150.232 | YT | 1.56E-07 | 2.16E-08 | 2.42E-08 |          | 2.87 | 4.04 | 1.75 |      |
| U75928UTR#1_s_at | O | C | 5 |  | 395.4   | 36.303  | OC |          | 5.51E-01 | 1.19E-08 | 8.24E-05 |      | 1.29 | 6.01 | 3.47 |
| U75928UTR#1_s_at | O | T | 5 |  | 509.1   | 86.894  | OT | 5.51E-01 |          | 2.72E-08 | 2.83E-04 | 1.29 |      | 4.67 | 2.69 |
| U75928UTR#1_s_at | Y | C | 5 |  | 2374.9  | 244.148 | YC | 1.19E-08 | 2.72E-08 |          | 6.06E-05 | 6.01 | 4.67 |      | 1.73 |
| U75928UTR#1_s_at | Y | T | 5 |  | 1370.7  | 32.368  | YT | 8.24E-05 | 2.83E-04 | 6.06E-05 |          | 3.47 | 2.69 | 1.73 |      |
| X06801cds_f_at   | O | C | 5 |  | 665.4   | 20.425  | OC |          | 1.41E-04 | 9.34E-03 | 2.11E-06 |      | 1.32 | 1.14 | 1.54 |
| X06801cds_f_at   | O | T | 5 |  | 505.4   | 24.172  | OT | 1.41E-04 |          | 6.34E-07 | 3.98E-02 | 1.32 |      | 1.50 | 1.17 |
| X06801cds_f_at   | Y | C | 5 |  | 760.6   | 23.465  | YC | 9.34E-03 | 6.34E-07 |          | 2.22E-08 | 1.14 | 1.50 |      | 1.76 |
| X06801cds_f_at   | Y | T | 5 |  | 433.3   | 22.932  | YT | 2.11E-06 | 3.98E-02 | 2.22E-08 |          | 1.54 | 1.17 | 1.76 |      |
| X07314cds_at     | O | C | 5 |  | 11239.0 | 278.324 | OC |          | 2.89E-07 | 3.08E-01 | 6.91E-11 |      | 1.81 | 1.06 | 5.16 |
| X07314cds_at     | O | T | 5 |  | 6193.9  | 546.268 | OT | 2.89E-07 |          | 1.62E-06 | 5.17E-06 | 1.81 |      | 1.71 | 2.84 |
| X07314cds_at     | Y | C | 5 |  | ####    | 422.048 | YC | 3.08E-01 | 1.62E-06 |          | 2.04E-10 | 1.06 | 1.71 |      | 4.87 |
| X07314cds_at     | Y | T | 5 |  | 2178.2  | 407.435 | YT | 6.91E-11 | 5.17E-06 | 2.04E-10 |          | 5.16 | 2.84 | 4.87 |      |
| X07314cds_g_at   | O | C | 5 |  | 9403.4  | 261.330 | OC |          | 3.76E-08 | 6.49E-02 | 1.65E-11 |      | 1.85 | 1.10 | 4.52 |
| X07314cds_g_at   | O | T | 5 |  | 5092.4  | 357.985 | OT | 3.76E-08 |          | 7.77E-07 | 4.04E-06 | 1.85 |      | 1.67 | 2.45 |
| X07314cds_g_at   | Y | C | 5 |  | 8529.4  | 207.267 | YC | 6.49E-02 | 7.77E-07 |          | 1.12E-10 | 1.10 | 1.67 |      | 4.10 |

|                 |   |   |   |  |        |         |    |          |          |          |          |       |      |      |       |
|-----------------|---|---|---|--|--------|---------|----|----------|----------|----------|----------|-------|------|------|-------|
| X07314cds_g_at  | Y | T | 5 |  | 2080.6 | 386.654 | YT | 1.65E-11 | 4.04E-06 | 1.12E-10 |          | 4.52  | 2.45 | 4.10 |       |
| X07365_s_at     | O | C | 5 |  | 4692.8 | 264.241 | OC |          | 1.19E-04 | 9.97E-02 | 5.43E-09 |       | 1.44 | 1.12 | 3.16  |
| X07365_s_at     | O | T | 5 |  | 3249.4 | 252.812 | OT | 1.19E-04 |          | 4.50E-03 | 1.35E-05 | 1.44  |      | 1.29 | 2.19  |
| X07365_s_at     | Y | C | 5 |  | 4193.3 | 145.833 | YC | 9.97E-02 | 4.50E-03 |          | 5.83E-08 | 1.12  | 1.29 |      | 2.82  |
| X07365_s_at     | Y | T | 5 |  | 1486.0 | 91.851  | YT | 5.43E-09 | 1.35E-05 | 5.83E-08 |          | 3.16  | 2.19 | 2.82 |       |
| X15030_at       | O | C | 5 |  | 6480.0 | 237.877 | OC |          | 3.86E-04 | 2.08E-02 | 1.42E-06 |       | 1.23 | 1.11 | 1.45  |
| X15030_at       | O | T | 5 |  | 5267.0 | 224.687 | OT | 3.86E-04 |          | 2.82E-06 | 9.15E-03 | 1.23  |      | 1.36 | 1.18  |
| X15030_at       | Y | C | 5 |  | 7175.4 | 197.745 | YC | 2.08E-02 | 2.82E-06 |          | 2.76E-08 | 1.11  | 1.36 |      | 1.61  |
| X15030_at       | Y | T | 5 |  | 4463.1 | 32.092  | YT | 1.42E-06 | 9.15E-03 | 2.76E-08 |          | 1.45  | 1.18 | 1.61 |       |
| X59736mRNA_at   | O | C | 5 |  | 1819.8 | 72.342  | OC |          | 2.45E-10 | 1.48E-04 | 1.89E-10 |       | 2.65 | 1.22 | 2.73  |
| X59736mRNA_at   | O | T | 5 |  | 687.0  | 50.156  | OT | 2.45E-10 |          | 2.45E-12 | 8.11E-01 | 2.65  |      | 3.24 | 1.03  |
| X59736mRNA_at   | Y | C | 5 |  | 2223.1 | 65.924  | YC | 1.48E-04 | 2.45E-12 |          | 2.01E-12 | 1.22  | 3.24 |      | 3.33  |
| X59736mRNA_at   | Y | T | 5 |  | 667.1  | 35.208  | YT | 1.89E-10 | 8.11E-01 | 2.01E-12 |          | 2.73  | 1.03 | 3.33 |       |
| X59864mRNA_at   | O | C | 5 |  | 6334.0 | 261.701 | OC |          | 2.65E-06 | 9.89E-08 | 5.12E-09 |       | 1.89 | 2.55 | 4.04  |
| X59864mRNA_at   | O | T | 5 |  | 3343.1 | 305.688 | OT | 2.65E-06 |          | 5.83E-02 | 6.88E-04 | 1.89  |      | 1.35 | 2.13  |
| X59864mRNA_at   | Y | C | 5 |  | 2480.4 | 259.790 | YC | 9.89E-08 | 5.83E-02 |          | 4.68E-02 | 2.55  | 1.35 |      | 1.58  |
| X59864mRNA_at   | Y | T | 5 |  | 1569.1 | 358.420 | YT | 5.12E-09 | 6.88E-04 | 4.68E-02 |          | 4.04  | 2.13 | 1.58 |       |
| X59864mRNA_g_at | O | C | 5 |  | 4730.6 | 292.835 | OC |          | 1.02E-06 | 2.04E-08 | 1.77E-09 |       | 1.80 | 2.48 | 3.42  |
| X59864mRNA_g_at | O | T | 5 |  | 2624.7 | 160.177 | OT | 1.02E-06 |          | 1.99E-02 | 3.66E-04 | 1.80  |      | 1.37 | 1.90  |
| X59864mRNA_g_at | Y | C | 5 |  | 1910.9 | 99.207  | YC | 2.04E-08 | 1.99E-02 |          | 7.42E-02 | 2.48  | 1.37 |      | 1.38  |
| X59864mRNA_g_at | Y | T | 5 |  | 1383.7 | 176.380 | YT | 1.77E-09 | 3.66E-04 | 7.42E-02 |          | 3.42  | 1.90 | 1.38 |       |
| X62660mRNA_g_at | O | C | 5 |  | 95.7   | 2.014   | OC |          | 1.46E-02 | 3.14E-01 | 2.44E-07 |       | 1.14 | 1.05 | 1.62  |
| X62660mRNA_g_at | O | T | 5 |  | 83.9   | 3.985   | OT | 1.46E-02 |          | 1.66E-03 | 2.82E-05 | 1.14  |      | 1.19 | 1.42  |
| X62660mRNA_g_at | Y | C | 5 |  | 100.2  | 3.023   | YC | 3.14E-01 | 1.66E-03 |          | 5.16E-08 | 1.05  | 1.19 |      | 1.70  |
| X62660mRNA_g_at | Y | T | 5 |  | 59.0   | 2.849   | YT | 2.44E-07 | 2.82E-05 | 5.16E-08 |          | 1.62  | 1.42 | 1.70 |       |
| X62951mRNA_s_at | O | C | 5 |  | 149.9  | 6.885   | OC |          | 1.09E-10 | 2.31E-01 | 6.16E-05 |       | 3.14 | 1.22 | 1.79  |
| X62951mRNA_s_at | O | T | 5 |  | 470.8  | 28.606  | OT | 1.09E-10 |          | 3.19E-11 | 7.77E-08 | 3.14  |      | 3.84 | 1.76  |
| X62951mRNA_s_at | Y | C | 5 |  | 122.7  | 6.323   | YC | 2.31E-01 | 3.19E-11 |          | 5.87E-06 | 1.22  | 3.84 |      | 2.18  |
| X62951mRNA_s_at | Y | T | 5 |  | 267.7  | 7.314   | YT | 6.16E-05 | 7.77E-08 | 5.87E-06 |          | 1.79  | 1.76 | 2.18 |       |
| X64827cds_s_at  | O | C | 5 |  | 6287.8 | 318.846 | OC |          | 4.43E-05 | 1.27E-02 | 3.48E-09 |       | 1.38 | 1.14 | 2.34  |
| X64827cds_s_at  | O | T | 5 |  | 4561.4 | 112.687 | OT | 4.43E-05 |          | 3.15E-07 | 1.77E-05 | 1.38  |      | 1.57 | 1.70  |
| X64827cds_s_at  | Y | C | 5 |  | 7161.6 | 197.296 | YC | 1.27E-02 | 3.15E-07 |          | 1.44E-10 | 1.14  | 1.57 |      | 2.67  |
| X64827cds_s_at  | Y | T | 5 |  | 2685.9 | 201.208 | YT | 3.48E-09 | 1.77E-05 | 1.44E-10 |          | 2.34  | 1.70 | 2.67 |       |
| X74835cds_at    | O | C | 5 |  | 419.7  | 30.521  | OC |          | 6.72E-07 | 2.74E-09 | 3.50E-10 |       | 1.82 | 3.06 | 4.45  |
| X74835cds_at    | O | T | 5 |  | 230.2  | 7.471   | OT | 6.72E-07 |          | 1.32E-03 | 3.55E-05 | 1.82  |      | 1.68 | 2.44  |
| X74835cds_at    | Y | C | 5 |  | 136.9  | 9.588   | YC | 2.74E-09 | 1.32E-03 |          | 9.46E-02 | 3.06  | 1.68 |      | 1.45  |
| X74835cds_at    | Y | T | 5 |  | 94.2   | 8.701   | YT | 3.50E-10 | 3.55E-05 | 9.46E-02 |          | 4.45  | 2.44 | 1.45 |       |
| X80130cds_f_at  | O | C | 5 |  | 3234.3 | 233.160 | OC |          | 4.64E-11 | 2.05E-08 | 1.83E-11 |       | 6.25 | 2.24 | 9.38  |
| X80130cds_f_at  | O | T | 5 |  | 517.2  | 35.759  | OT | 4.64E-11 |          | 7.28E-05 | 3.40E-01 | 6.25  |      | 2.79 | 1.50  |
| X80130cds_f_at  | Y | C | 5 |  | 1444.8 | 72.691  | YC | 2.05E-08 | 7.28E-05 |          | 1.10E-05 | 2.24  | 2.79 |      | 4.19  |
| X80130cds_f_at  | Y | T | 5 |  | 344.7  | 21.855  | YT | 1.83E-11 | 3.40E-01 | 1.10E-05 |          | 9.38  | 1.50 | 4.19 |       |
| X80130cds_i_at  | O | C | 5 |  | 3829.9 | 411.190 | OC |          | 6.45E-09 | 4.99E-07 | 3.82E-09 |       | 8.43 | 2.79 | 11.66 |
| X80130cds_i_at  | O | T | 5 |  | 454.4  | 25.838  | OT | 6.45E-09 |          | 8.17E-03 | 6.84E-01 | 8.43  |      | 3.02 | 1.38  |
| X80130cds_i_at  | Y | C | 5 |  | 1373.5 | 125.063 | YC | 4.99E-07 | 8.17E-03 |          | 3.42E-03 | 2.79  | 3.02 |      | 4.18  |
| X80130cds_i_at  | Y | T | 5 |  | 328.4  | 11.444  | YT | 3.82E-09 | 6.84E-01 | 3.42E-03 |          | 11.66 | 1.38 | 4.18 |       |

|               |   |   |   |  |        |         |    |          |          |          |          |      |      |      |      |
|---------------|---|---|---|--|--------|---------|----|----------|----------|----------|----------|------|------|------|------|
| X96437mRNA_at | O | C | 5 |  | 194.5  | 6.599   | OC |          | 8.85E-01 | 9.28E-02 | 3.25E-05 |      | 1.02 | 1.26 | 1.66 |
| X96437mRNA_at | O | T | 5 |  | 197.8  | 10.500  | OT | 8.85E-01 |          | 7.08E-02 | 4.33E-05 | 1.02 |      | 1.28 | 1.63 |
| X96437mRNA_at | Y | C | 5 |  | 154.5  | 6.572   | YC | 9.28E-02 | 7.08E-02 |          | 1.28E-06 | 1.26 | 1.28 |      | 2.08 |
| X96437mRNA_at | Y | T | 5 |  | 322.1  | 28.341  | YT | 3.25E-05 | 4.33E-05 | 1.28E-06 |          | 1.66 | 1.63 | 2.08 |      |
| Z78279_at     | O | C | 5 |  | 237.4  | 16.372  | OC |          | 8.57E-01 | 4.05E-07 | 1.30E-01 |      | 1.37 | ###  | 3.34 |
| Z78279_at     | O | T | 5 |  | 173.4  | 36.395  | OT | 8.57E-01 |          | 3.03E-07 | 9.38E-02 | 1.37 |      | ###  | 4.58 |
| Z78279_at     | Y | C | 5 |  | 3091.4 | 451.552 | YC | 4.05E-07 | 3.03E-07 |          | 6.14E-06 | ###  | ###  |      | 3.89 |
| Z78279_at     | Y | T | 5 |  | 793.9  | 192.591 | YT | 1.30E-01 | 9.38E-02 | 6.14E-06 |          | 3.34 | 4.58 | 3.89 |      |
| Z78279_g_at   | O | C | 5 |  | 372.7  | 24.051  | OC |          | 6.96E-01 | 9.51E-08 | 1.09E-01 |      | 1.55 | 9.17 | 2.52 |
| Z78279_g_at   | O | T | 5 |  | 240.2  | 38.791  | OT | 6.96E-01 |          | 5.32E-08 | 5.23E-02 | 1.55 |      | ###  | 3.91 |
| Z78279_g_at   | Y | C | 5 |  | 3418.3 | 439.070 | YC | 9.51E-08 | 5.32E-08 |          | 1.41E-06 | 9.17 | ###  |      | 3.64 |
| Z78279_g_at   | Y | T | 5 |  | 939.0  | 165.484 | YT | 1.09E-01 | 5.23E-02 | 1.41E-06 |          | 2.52 | 3.91 | 3.64 |      |

**Supplementary Table 4.** Order that probe sets with a significant age-atrophy interaction after Bonferroni adjustment were clustered by SAS 8. Column 1 is the order of appearance of the gene in the hierarchical cluster shown in Figure 1 of Supplementary Material, column 2 is the gene name, column 3 the accession number and column 4 the gene function assigned. Note that when multiple probe sets represent a single mRNA they are clustered together. Likewise, genes of similar expression patterns and functions tend to cluster together.

|    | <b>GENE NAME</b>                                                                                                  | <b>ID</b> | <b>GENE FUNCTION</b>               |
|----|-------------------------------------------------------------------------------------------------------------------|-----------|------------------------------------|
| 1  | ESTs similar to mouse NADH dehydrogenase (ubiquinone) 1 beta subcomplex 5                                         | AA684537  | electron transport                 |
| 2  | ESTs unknown function                                                                                             | AI029702  | ESTs unknown function              |
| 3  | ATP synthase, H <sup>+</sup> transporting, mitochondrial F0 complex, subunit c, isoform 1                         | D13123    | proton transport                   |
| 4  | ESTs unknown function                                                                                             | AA957244  | ESTs unknown function              |
| 5  | ESTs similar to mouse mitochondrial ribosomal protein L12                                                         | AI176961  | structural constituent of ribosome |
| 6  | ESTs similar to mouse FXVD domain-containing ion transport regulator 1 (phospholemman)                            | AA799645  | ion transport                      |
| 7  | ESTs unknown function                                                                                             | AI011738  | ESTs unknown function              |
| 8  | solute carrier family 4, member 3, anion exchange protein 3                                                       | J05167    | small molecule transport           |
| 9  | fatty acid binding protein 3, heart                                                                               | J02773    | transport                          |
| 10 | ESTs similar to mouse serine hydrolase-like                                                                       | AI232409  | aromatic compound metabolism       |
| 11 | heat shock protein 70-3                                                                                           | X77209    | chaperone                          |
| 12 | ESTs similar to mouse NADH dehydrogenase (ubiquinone) 1 beta subcomplex, 5, 16kDa                                 | AA893185  | electron transport                 |
| 13 | ESTs highly similar to mouse estrogen related receptor, alpha                                                     | AA799479  | regulation of transcription        |
| 14 | ESTs similar to mouse FXVD domain-containing ion transport regulator 1 (phospholemman)                            | AA799645  | ion transport                      |
| 15 | ESTs similar to mouse microsomal glutathione S-transferase 3                                                      | AA892234  | glutathione transferase            |
| 16 | ESTs unknown function                                                                                             | AI010326  | ESTs unknown function              |
| 17 | ESTs unknown function                                                                                             | AI236726  | ESTs unknown function              |
| 18 | ESTs similar to mouse solute carrier family 25 (mitochondrial carrier; adenine nucleotide translocator), member 4 | AA849754  | small molecule transport           |
| 19 | ESTs similar to mouse dystroglycan 1 (dystrophin-associated glycoprotein 1)                                       | AA943734  | muscle contraction                 |
| 20 | ESTs unknown function                                                                                             | AI228284  | ESTs unknown function              |
| 21 | homer, neuronal immediate early gene, 2                                                                           | AB007689  | signaling                          |
| 22 | creatine kinase, mitochondrial 2, sarcomeric                                                                      | X59736    | muscle contraction                 |
| 23 | ESTs unknown function                                                                                             | AI045368  | ESTs unknown function              |
| 24 | homer, neuronal immediate early gene, 2                                                                           | AB007689  | signaling                          |
| 25 | ESTs similar to mouse protein tyrosine kinase 9-like (A6-related protein)                                         | AI171452  | signaling                          |
| 26 | aminolevulinic acid synthase 1                                                                                    | J03190    | heme biosynthesis                  |
| 27 | ESTs unknown function                                                                                             | AI228301  | ESTs unknown function              |
| 28 | PDZ and LIM domain 1 (elfin)                                                                                      | U23769    | signaling                          |
| 29 | ESTs unknown function                                                                                             | AA799518  | ESTs unknown function              |
| 30 | ESTs unknown function                                                                                             | AA799518  | ESTs unknown function              |
| 31 | ESTs unknown function                                                                                             | AI170956  | ESTs unknown function              |

|    |                                                                                                           |          |                                              |
|----|-----------------------------------------------------------------------------------------------------------|----------|----------------------------------------------|
| 32 | ESTs very weakly similar to human angiomin                                                                | AI014132 | Genes unknown fxn                            |
| 33 | homer, neuronal immediate early gene, 2                                                                   | AB007690 | signaling                                    |
| 34 | homer, neuronal immediate early gene, 2                                                                   | AI058957 | signaling                                    |
| 35 | homer, neuronal immediate early gene, 2                                                                   | AI060224 | signaling                                    |
| 36 | ESTs unknown function                                                                                     | AI168941 | ESTs unknown function                        |
| 37 | serine (or cysteine) proteinase inhibitor, clade H, member 1                                              | M69246   | chaperone                                    |
| 38 | ESTs weakly similar to human cytidine deaminase                                                           | AA859352 | nucleic acid metabolism                      |
| 39 | ESTs highly similar to mouse scleraxis                                                                    | AI172335 | Genes unknown fxn                            |
| 40 | ESTs unknown function                                                                                     | AI176067 | ESTs unknown function                        |
| 41 | ESTs similar to mouse tropomyosin 2, beta                                                                 | AA858875 | muscle contraction                           |
| 42 | ESTs similar to human NADH:ubiquinone oxidoreductase MLRQ subunit homolog                                 | AA686870 | electron transport                           |
| 43 | ESTs similar to mouse P311 mRNA                                                                           | AA926262 | Genes unknown fxn                            |
| 44 | ESTs similar to mouse fibrillin 1                                                                         | AA997765 | extracellular matrix                         |
| 45 | ESTs highly similar to mouse lysyl oxidase-like 2                                                         | AI180353 | extracellular matrix                         |
| 46 | protein phosphatase 1, regulatory (inhibitor) subunit 1A                                                  | J05592   | inhibitor                                    |
| 47 | ESTs unknown function                                                                                     | AA957835 | ESTs unknown function                        |
| 48 | ESTs similar to mouse procollagen, type XV                                                                | AA800298 | extracellular matrix                         |
| 49 | ESTs similar to mouse procollagen, type VI, alpha 1                                                       | AI235893 | extracellular matrix                         |
| 50 | ESTs unknown function                                                                                     | AI228132 | ESTs unknown function                        |
| 51 | ESTs similar to mouse chondrolectin                                                                       | AI029745 | lectin                                       |
| 52 | ESTs similar to mouse kerotocan                                                                           | AA957596 | extracellular matrix                         |
| 53 | collagen type XI, alpha 1                                                                                 | AA942906 | extracellular matrix                         |
| 54 | aquaporin 7                                                                                               | AB000507 | transport                                    |
| 55 | ESTs similar to mouse follistatin like mRNA                                                               | AA849769 | serine protease inhibitor                    |
| 56 | ESTs similar to mouse nidogen (entactin)                                                                  | AI176500 | extracellular matrix                         |
| 57 | protein phosphatase 1, regulatory (inhibitor) subunit 1A                                                  | J05592   | inhibitor                                    |
| 58 | ESTs similar to mouse procollagen, type IV, alpha 1                                                       | AI176393 | extracellular matrix                         |
| 59 | ESTs similar to mouse collagen, type XV, alpha 1                                                          | AI232103 | extracellular matrix                         |
| 60 | ESTs unknown function                                                                                     | AI171813 | ESTs unknown function                        |
| 61 | ESTs similar to mouse serum deprivation response                                                          | AA859444 | phospholipid binding                         |
| 62 | ESTs unknown function                                                                                     | AA859885 | ESTs unknown function                        |
| 63 | ESTs similar to mouse nidogen (entactin)                                                                  | AI235948 | extracellular matrix                         |
| 64 | ESTs weakly similar to mouse follistatin like mRNA                                                        | AI010449 | serine protease inhibitor                    |
| 65 | ESTs similar to mouse protein tyrosine phosphatase-like (proline instead of catalytic arginine), member a | AI177543 | signaling                                    |
| 66 | cyclin D1                                                                                                 | D14014   | cell cycle                                   |
| 67 | ESTs similar to mouse procollagen, type XIV, alpha 1 (undulin)                                            | AA998128 | extracellular matrix                         |
| 68 | ESTs similar to mouse extracellular matrix protein 1                                                      | AI237589 | extracellular matrix                         |
| 69 | ESTs unknown function                                                                                     | AF034237 | ESTs unknown function                        |
| 70 | ESTs similar to human latent transforming growth factor beta binding protein 4                            | AI177967 | extracellular matrix                         |
| 71 | ESTs similar to human growth factor receptor-bound protein 10 (GRB10)                                     | AA800686 | signal transduction                          |
| 72 | ectonucleoside triphosphate diphosphohydrolase 2                                                          | AI230130 | G-protein coupled receptor protein signaling |
| 73 | ESTs similar to human myosin, light polypeptide 6, alkali, smooth muscle and non-muscle                   | S77858   | cytoskeleton organization and biogenesis     |



|     |                                                                                                                                                      |          |                                          |
|-----|------------------------------------------------------------------------------------------------------------------------------------------------------|----------|------------------------------------------|
| 74  | cytochrome P450 lanosterol 14 alpha-demethylase                                                                                                      | U17697   | electron transport                       |
| 75  | ESTs similar to mouse laminin, gamma 1                                                                                                               | AI009131 | extracellular matrix                     |
| 76  | ESTs similar to mouse serum deprivation response                                                                                                     | AI171350 | phospholipid binding                     |
| 77  | ESTs unknown function                                                                                                                                | AI176540 | ESTs unknown function                    |
| 78  | ESTs similar to mouse sialyltransferase 7 ((alpha-N-acetylneuraminy-2,3-beta-galactosyl-1,3)-N-acetyl galactosaminide alpha-2,6-sialyltransferase) D | AA818639 | glycosylation                            |
| 79  | ESTs unknown function                                                                                                                                | AI230208 | ESTs unknown function                    |
| 80  | ESTs similar to mouse poly(rC) binding protein 4                                                                                                     | AA891314 | nucleic acid binding                     |
| 81  | ESTs unknown function                                                                                                                                | AI029021 | ESTs unknown function                    |
| 82  | ESTs similar to mouse serine (or cysteine) proteinase inhibitor, clade F), member 1                                                                  | AI179984 | Inhibitor                                |
| 83  | phosphate cytidyltransferase 2, ethanolamine                                                                                                         | AF080568 | Genes unknown fxn                        |
| 84  | BCL2/adenovirus E1B 19kD interacting protein 1                                                                                                       | AA819398 | anti-apoptosis                           |
| 85  | ESTs similar to human NADH dehydrogenase (ubiquinone) 1 beta subcomplex, 6, 17kDa                                                                    | AA900199 | electron transport                       |
| 86  | ESTs similar to human gene overexpressed in astrocytoma                                                                                              | AA957501 | Genes unknown fxn                        |
| 87  | ESTs similar to mouse cysteine rich intestinal protein                                                                                               | AA925057 | cell proliferation                       |
| 88  | ESTs similar to mouse septin 8                                                                                                                       | AA964777 | Genes unknown fxn                        |
| 89  | ESTs similar to mouse calumenin                                                                                                                      | AI236039 | blood coagulation                        |
| 90  | ATP synthase, H <sup>+</sup> transporting, mitochondrial F1 complex, O subunit (oligomycin sensitivity conferring protein)                           | AI104244 | proton transport                         |
| 91  | ESTs unknown function                                                                                                                                | AI232948 | ESTs unknown function                    |
| 92  | aconitase 2, mitochondrial                                                                                                                           | AI170777 | tricarboxylic acid cycle                 |
| 93  | aconitase 2, mitochondrial                                                                                                                           | AI170777 | tricarboxylic acid cycle                 |
| 94  | ESTs similar to human mitochondrial ribosomal protein L46                                                                                            | AI169228 | Genes unknown fxn                        |
| 95  | heat shock 10 kD protein 1 (chaperonin 10)                                                                                                           | AI170613 | chaperone                                |
| 96  | hydroxyacyl-Coenzyme A dehydrogenase/3-ketoacyl-Coenzyme A hiolase/enoyl-Coenzyme A hydratase (trifunctional protein), alpha subunit                 | D16478   | lipid metabolism                         |
| 97  | potassium inwardly rectifying channel, subfamily J, member 11                                                                                        | D86039   | ion transport                            |
| 98  | ESTs unknown function                                                                                                                                | AA955741 | ESTs unknown function                    |
| 99  | ESTs similar to human NADH dehydrogenase (ubiquinone) 1 beta subcomplex, 7, 18kDa                                                                    | AA850130 | electron transport                       |
| 100 | ESTs similar to human cytochrome c oxidase subunit VIb                                                                                               | AA946040 | electron transport                       |
| 101 | ESTs similar to mouse ATP synthase, H <sup>+</sup> transporting, mitochondrial F0 complex, subunit f, isoform 2                                      | AI101157 | proton transport                         |
| 102 | smooth muscle alpha-actin                                                                                                                            | X06801   | cytoskeleton organization and biogenesis |
| 103 | ESTs unknown function                                                                                                                                | AI104035 | ESTs unknown function                    |
| 104 | ESTs unknown function                                                                                                                                | AA818971 | ESTs unknown function                    |
| 105 | ESTs unknown function                                                                                                                                | AI072992 | ESTs unknown function                    |
| 106 | ESTs similar to human NADH dehydrogenase (ubiquinone) 1 beta subcomplex, 8, 19kDa                                                                    | AA851403 | electron transport                       |
| 107 | zinc finger protein Y1 (RLZF-Y) mRNA                                                                                                                 | AI013250 | Genes unknown fxn                        |
| 108 | ESTs similar to human NADH dehydrogenase (ubiquinone) 1 beta subcomplex, 7, 18kDa                                                                    | AA850130 | electron transport                       |
| 109 | ESTs similar to human myofibrillogenesis regulator 1 (MR-1)                                                                                          | AI102715 | Genes unknown fxn                        |
| 110 | annexin V                                                                                                                                            | D42137   | blood coagulation                        |

|     |                                                                                                                         |          |                                  |
|-----|-------------------------------------------------------------------------------------------------------------------------|----------|----------------------------------|
| 111 | ESTs similar to human low molecular mass ubiquinone-binding protein (9.5kD)                                             | AI233054 | Genes unknown fxn                |
| 112 | ESTs unknown function                                                                                                   | AA849609 | ESTs unknown function            |
| 113 | lipoprotein lipase                                                                                                      | L03294   | lipid metabolism                 |
| 114 | ESTs similar to human 13kDa differentiation-associated protein (alias: NADH: ubiquinone oxidoreductase subunit B17.2)   | AI103851 | Genes unknown fxn                |
| 115 | ESTs unknown function                                                                                                   | AI171448 | ESTs unknown function            |
| 116 | peroxiredoxin 2                                                                                                         | U06099   | selenium binding, oxidoreductase |
| 117 | ESTs highly similar to mouse clone similar to ubiquitin-like protein GDX (ubiquitin-like protein 4)                     | AA817861 | protein modification             |
| 118 | ESTs unknown function                                                                                                   | AA859325 | ESTs unknown function            |
| 119 | ESTs unknown function                                                                                                   | AI178764 | ESTs unknown function            |
| 120 | ESTs similar to mouse NADH dehydrogenase (ubiquinone) Fe-S protein 3                                                    | AI229680 | electron transport               |
| 121 | ESTs similar to mouse cytochrome c oxidase subunit VIIb                                                                 | AA866477 | electron transport               |
| 122 | ESTs unknown function                                                                                                   | AI012145 | ESTs unknown function            |
| 123 | ESTs similar to human electron-transfer-flavoprotein, beta polypeptide                                                  | AI179147 | electron transport               |
| 124 | ESTs unknown function                                                                                                   | AI104483 | ESTs unknown function            |
| 125 | dapit (known as stretch regulated skeletal muscle protein Usmg5 gene in mouse)                                          | AI045107 | Genes unknown fxn                |
| 126 | ESTs similar to mouse small EDRK-rich factor 2                                                                          | AI172471 | Genes unknown fxn                |
| 127 | ESTs similar to mouse WD repeat domain 1                                                                                | AI229849 | actin binding                    |
| 128 | nucleoside diphosphate kinase                                                                                           | M91597   | ATP binding                      |
| 129 | ESTs unknown function                                                                                                   | AI171994 | ESTs unknown function            |
| 130 | cytochrome c oxidase, subunit Va                                                                                        | X15030   | electron transport               |
| 131 | ESTs highly similar to mouse ATP synthase, H <sup>+</sup> transporting, mitochondrial F <sub>0</sub> complex, subunit g | AA944393 | proton transport                 |
| 132 | ESTs similar to human NADH dehydrogenase (ubiquinone) 1 beta subcomplex, 10, 22kDa                                      | AI229497 | electron transport               |
| 133 | ESTs similar to human ubiquinol-cytochrome c reductase hinge protein                                                    | AI008066 | electron transport               |
| 134 | TBP-interacting protein Tip120B                                                                                         | AI137210 | Genes unknown fxn                |
| 135 | ESTs similar to mouse NADH dehydrogenase (ubiquinone) Fe-S protein 2                                                    | AI170770 | electron transport               |
| 136 | ESTs similar to human NADH dehydrogenase (ubiquinone) 1, subcomplex unknown, 2, 14.5kDa                                 | AA900580 | electron transport               |
| 137 | ESTs similar to human NADH dehydrogenase (ubiquinone) 1 beta subcomplex, 8, 19kDa                                       | AA964320 | electron transport               |
| 138 | cytochrome c oxidase subunit Vb                                                                                         | AI229620 | electron transport               |
| 139 | small muscle protein, X-linked                                                                                          | AA800221 | muscle contraction               |
| 140 | ESTs unknown function                                                                                                   | AA946411 | ESTs unknown function            |
| 141 | glutathione transferase subunit 8                                                                                       | X62660   | Genes unknown fxn                |
| 142 | ATP synthase subunit d (Atp5jd)                                                                                         | AA925814 | proton transport                 |
| 143 | ESTs similar to mouse nuclear transport factor 2                                                                        | AI101343 | transport                        |
| 144 | ESTs similar to mouse cytochrome c oxidase, subunit VIIc                                                                | AI009490 | electron transport               |
| 145 | ESTs similar to mouse NADH dehydrogenase (ubiquinone) 1 alpha subcomplex 2                                              | AI232903 | electron transport               |
| 146 | ESTs similar to human GDP dissociation inhibitor 2                                                                      | AI105149 | vesicle transport                |
| 147 | Cytochrom c oxidase subunit VIII-H (heart/muscle)                                                                       | U40836   | electron transport               |

|     |                                                                                                      |          |                                  |
|-----|------------------------------------------------------------------------------------------------------|----------|----------------------------------|
| 148 | Cytochrom c oxidase subunit VIII-H (heart/muscle)                                                    | X64827   | electron transport               |
| 149 | ATP synthase, H <sup>+</sup> transporting, mitochondrial F1 complex, delta subunit                   | A1104953 | proton transport                 |
| 150 | small muscle protein, X-linked (chisel)                                                              | AA924417 | muscle contraction               |
| 151 | diazepam binding inhibitor                                                                           | A1010581 | transport                        |
| 152 | glutathione peroxidase 1                                                                             | X07365   | selenium binding, oxidoreductase |
| 153 | ESTs unknown function                                                                                | AA946124 | ESTs unknown function            |
| 154 | ESTs unknown function                                                                                | A1175529 | ESTs unknown function            |
| 155 | ESTs unknown function                                                                                | AA963716 | ESTs unknown function            |
| 156 | dynein light chain-2                                                                                 | A1103774 | Genes unknown fxn                |
| 157 | ESTs similar to human JTV1 gene                                                                      | AA799766 | Genes unknown fxn                |
| 158 | ESTs unknown function                                                                                | A1009197 | ESTs unknown function            |
| 159 | peroxiredoxin 4                                                                                      | A1232900 | antioxidant                      |
| 160 | ESTs unknown function                                                                                | A1102083 | ESTs unknown function            |
| 161 | Myosin, light polypeptide 2, alkali; ventricular, skeletal, slow                                     | X07314   | muscle contraction               |
| 162 | Myosin, light polypeptide 2, alkali; ventricular, skeletal, slow                                     | X07314   | muscle contraction               |
| 163 | calsequestrin 2                                                                                      | AA924985 | muscle contraction               |
| 164 | ESTs similar to mouse tropomyosin 3, gamma                                                           | A1170775 | muscle development               |
| 165 | ESTs similar to mouse tropomyosin 3, gamma                                                           | A1170847 | muscle development               |
| 166 | collagen type XI, alpha 1                                                                            | AJ005396 | extracellular matrix             |
| 167 | secreted acidic cysteine rich glycoprotein (osteonectin)                                             | U75929   | extracellular matrix             |
| 168 | secreted acidic cysteine rich glycoprotein (osteonectin)                                             | R47128   | extracellular matrix             |
| 169 | secreted acidic cysteine rich glycoprotein (osteonectin)                                             | AA946313 | extracellular matrix             |
| 170 | procollagen, type I, alpha 2                                                                         | AA819207 | extracellular matrix             |
| 171 | procollagen, type I, alpha 2                                                                         | A1101443 | extracellular matrix             |
| 172 | procollagen, type I, alpha 1                                                                         | M27207   | extracellular matrix             |
| 173 | collagen, type 1, alpha 1                                                                            | U75405   | extracellular matrix             |
| 174 | secreted acidic cysteine rich glycoprotein (osteonectin)                                             | U75928   | extracellular matrix             |
| 175 | secreted acidic cysteine rich glycoprotein (osteonectin)                                             | R46953   | extracellular matrix             |
| 176 | secreted acidic cysteine rich glycoprotein (osteonectin)                                             | R47150   | extracellular matrix             |
| 177 | ESTs similar to mouse P311 mRNA                                                                      | A1071578 | Genes unknown fxn                |
| 178 | ESTs similar to mouse P311 mRNA                                                                      | A1071578 | Genes unknown fxn                |
| 179 | ESTs similar to mouse clone similar to human KDEL endoplasmic reticulum protein retention receptor 3 | AA818372 | Genes unknown fxn                |
| 180 | collagen, type 1, alpha 1                                                                            | Z78279   | extracellular matrix             |
| 181 | collagen, type 1, alpha 1                                                                            | Z78279   | extracellular matrix             |
| 182 | collagen, type 1, alpha 1                                                                            | A1231472 | extracellular matrix             |
| 183 | procollagen, type I, alpha 2                                                                         | A1101443 | extracellular matrix             |
| 184 | ESTs similar to human procollagen, type I, alpha 2                                                   | AA859284 | extracellular matrix             |
| 185 | ESTs unknown function                                                                                | AA875531 | ESTs unknown function            |
| 186 | procollagen, type I, alpha 2                                                                         | A1101443 | extracellular matrix             |
| 187 | ESTs highly similar to rat non-coding RNA expressed in the brain, repeat sequence, clone 12          | AA900746 | Genes unknown fxn                |
| 188 | ESTs similar to mouse maternally expressed gene 3                                                    | AA943010 | Genes unknown fxn                |
| 189 | ESTs similar to mouse procollagen, type IV, alpha 1                                                  | A1175875 | extracellular matrix             |
| 190 | ESTs highly similar to mouse P311 mRNA                                                               | A1105417 | Genes unknown fxn                |
| 191 | ESTs similar to mouse transferrin receptor                                                           | A1237645 | iron homeostasis                 |

|     |                                                                                          |          |                                  |
|-----|------------------------------------------------------------------------------------------|----------|----------------------------------|
| 192 | ESTs unknown function                                                                    | AI639088 | ESTs unknown function            |
| 193 | ESTs unknown function                                                                    | AI171466 | ESTs unknown function            |
| 194 | ESTs similar to human myosin light chain 1 slow a                                        | AI230220 | Genes unknown fxn                |
| 195 | cold inducible RNA binding protein                                                       | AB000362 | nucleic acid binding             |
| 196 | retroviral-like ovarian specific transcript 30-1 mRNA                                    | U48828   | Genes unknown fxn                |
| 197 | ESTs similar to mouse immunoglobulin superfamily, member 4                               | H31479   | Genes unknown fxn                |
| 198 | ESTs similar to rat retroviral-like ovarian specific transcript 30-1 mRNA                | H31125   | Genes unknown fxn                |
| 199 | mRNA (pBUS19) with repetitive elements                                                   | X62951   | Genes unknown fxn                |
| 200 | ESTs unknown function                                                                    | AA963077 | ESTs unknown function            |
| 201 | ESTs similar to mouse ATP-binding cassette, subfamily A, member 1                        | AA964962 | small molecule transport         |
| 202 | diaphorase (NADH) (cytochrome b-5 reductase)                                             | AA963839 | iron transport                   |
| 203 | ESTs unknown function                                                                    | AI176839 | ESTs unknown function            |
| 204 | ESTs unknown function                                                                    | AA998174 | ESTs unknown function            |
| 205 | VL30 element mRNA                                                                        | AI230199 | Genes unknown fxn                |
| 206 | ESTs unknown function                                                                    | AI104675 | ESTs unknown function            |
| 207 | ESTs similar to rat retroviral-like ovarian specific transcript 30-1 mRNA                | AI235481 | Genes unknown fxn                |
| 208 | ESTs similar to mouse immunoglobulin superfamily, member 4                               | AI009996 | Genes unknown fxn                |
| 209 | neurofilament protein, middle polypeptide                                                | Z12152   | intermediate filament            |
| 210 | apurinic/apurimidinic endonuclease 1 (APEX nuclease multifunctional DNA repair enzyme 1) | D44495   | DNA repair                       |
| 211 | ESTs similar to mouse RNA binding protein gene with multiple splicing                    | AA859519 | RNA processing                   |
| 212 | ESTs unknown function                                                                    | AA963797 | ESTs unknown function            |
| 213 | ESTs weakly similar to human PNAS-127 mRNA                                               | AA999183 | Genes unknown fxn                |
| 214 | diaphorase (NADH) (cytochrome b-5 reductase)                                             | AI229440 | iron transport                   |
| 215 | ESTs unknown function                                                                    | AI008504 | ESTs unknown function            |
| 216 | ESTs weakly similar to mouse syndecan 2                                                  | AI011678 | extracellular matrix             |
| 217 | ESTs unknown function                                                                    | AA996896 | ESTs unknown function            |
| 218 | RT1 class Ib gene                                                                        | AI103500 | immune response                  |
| 219 | p47 protein                                                                              | AB002086 | Genes unknown fxn                |
| 220 | ESTs unknown function                                                                    | AA944212 | ESTs unknown function            |
| 221 | ESTs unknown function                                                                    | AI171587 | ESTs unknown function            |
| 222 | cystatin C                                                                               | AI231292 | protease inhibitor               |
| 223 | fatty acid Coenzyme A ligase, long chain 4                                               | D85189   | lipid metabolism                 |
| 224 | ESTs similar to mouse glutathione peroxidase 3                                           | AI172411 | selenium binding, oxidoreductase |
| 225 | proteasome (prosome, macropain) 26S subunit, ATPase                                      | D50694   | Protein degradation              |
| 226 | proteasome (prosome, macropain) 26S subunit, ATPase, 4                                   | D50695   | Protein degradation              |
| 227 | B-cell translocation gene 1, anti-proliferative                                          | L26268   | cell cycle                       |
| 228 | RNA helicase                                                                             | U25746   | Genes unknown fxn                |
| 229 | ESTs similar to mouse NY-REN-18 antigen                                                  | AI232313 | Genes unknown fxn                |
| 230 | ESTs unknown function                                                                    | AA849720 | ESTs unknown function            |
| 231 | ESTs similar to mouse programmed cell death 5                                            | AI172308 | apoptosis                        |
| 232 | ESTs similar to mouse serine palmitoyltransferase, long chain base subunit 1             | AA892380 | amino acid metabolism            |

|     |                                                                                                 |          |                                    |
|-----|-------------------------------------------------------------------------------------------------|----------|------------------------------------|
| 233 | ESTs similar to human suppressor of G2 allele of SKP1, <i>S. cerevisiae</i> , homolog of (SGT1) | AA901343 | cell cycle                         |
| 234 | lactate dehydrogenase A                                                                         | M54926   | glycolysis                         |
| 235 | ESTs unknown function                                                                           | AI175474 | ESTs unknown function              |
| 236 | aldolase A, fructose-bisphosphate                                                               | AA924326 | glycolysis                         |
| 237 | ESTs unknown function                                                                           | AA875032 | ESTs unknown function              |
| 238 | ESTs similar to mouse next to the Brca1                                                         | AA925045 | tumor antigen                      |
| 239 | ESTs similar to mouse upregulated skeletal muscle protein Usmg4                                 | AA818952 | Genes unknown fxn                  |
| 240 | ESTs similar to mouse DEAD (aspartate-glutamate-alanine-aspartate) box polypeptide 5            | AA851926 | nucleic acid binding               |
| 241 | ESTs unknown function                                                                           | AI179840 | ESTs unknown function              |
| 242 | ESTs similar to mouse neuralized homolog ( <i>Drosophila</i> )                                  | AA963167 | neurogenesis                       |
| 243 | ESTs similar to mouse sclerostin                                                                | AI170709 | Genes unknown fxn                  |
| 244 | ESTs similar to human eukaryotic translation initiation factor 4 gamma, 3                       | AA964477 | protein synthesis                  |
| 245 | ESTs similar to mouse WW domain-containing protein 3                                            | AI176607 | Genes unknown fxn                  |
| 246 | eukaryotic translation initiation factor 2B, subunit 3 (gamma, 58kD)                            | U38253   | protein synthesis                  |
| 247 | ESTs similar to mouse partial mRNA for stretch response protein 553 (sr553 gene)                | AI073178 | Genes unknown fxn                  |
| 248 | ESTs similar to mouse aldehyde dehydrogenase 9, subfamily A1                                    | AI105188 | electron transport                 |
| 249 | 26S proteasome, subunit p112 (non-ATPase subunit)                                               | U57050   | Protein degradation                |
| 250 | ESTs similar to mouse N-myristoyltransferase 1                                                  | AA859942 | protein modification               |
| 251 | purinergic receptor P2X, ligand-gated ion channel 4                                             | AA924532 | ion transport                      |
| 252 | Sip30 SNAP25 interacting protein 30                                                             | AA819709 | Genes unknown fxn                  |
| 253 | ESTs similar to mouse eukaryotic translation initiation factor 3, subunit 8 (110 kDa)           | AA851785 | protein synthesis                  |
| 254 | ESTs similar to human golgi-specific brefeldin A resistance factor 1                            | AA924964 | Genes unknown fxn                  |
| 255 | protease (prosome, macropain) 26S subunit, ATPase 1                                             | D50696   | Protein degradation                |
| 256 | ESTs unknown function                                                                           | AI175594 | ESTs unknown function              |
| 257 | ESTs unknown function                                                                           | AA818123 | ESTs unknown function              |
| 258 | ESTs weakly similar to mouse ribosomal protein L23                                              | AA944741 | structural constituent of ribosome |
| 259 | general transcription factor IIB                                                                | X65948   | transcription factor               |
| 260 | iron-responsive element-binding protein                                                         | AI176621 | Genes unknown fxn                  |
| 261 | PRG1 gene (immediate early response 3)                                                          | X96437   | anti-apoptosis                     |
| 262 | ESTs highly similar to mouse lysyl oxidase-like 2                                               | AI071855 | extracellular matrix               |
| 263 | ESTs unknown function                                                                           | AA800168 | ESTs unknown function              |
| 264 | ESTs unknown function                                                                           | AA956871 | ESTs unknown function              |
| 265 | ESTs similar to human tropomodulin                                                              | AI104913 | cytoskeletal                       |
| 266 | ESTs similar to human ataxin 2-binding protein 1                                                | AI175100 | nucleic acid binding               |
| 267 | ESTs unknown function                                                                           | AA849312 | ESTs unknown function              |
| 268 | ESTs similar to mouse glyoxylate reductase/hydroxypyruvate reductase                            | AA924630 | electron transport                 |
| 269 | zinc finger protein (pMLZ-4) (zinc finger protein 46)                                           | AI229253 | nucleic acid binding               |
| 270 | ESTs unknown function                                                                           | AI227672 | ESTs unknown function              |
| 271 | ESTs unknown function                                                                           | AA891790 | ESTs unknown function              |
| 272 | ESTs unknown function                                                                           | AA946449 | ESTs unknown function              |

|     |                                                                            |          |                                           |
|-----|----------------------------------------------------------------------------|----------|-------------------------------------------|
| 273 | ESTs unknown function                                                      | AI169053 | ESTs unknown function                     |
| 274 | microtubule-associated proteins 1A/1B light chain 3 (MPL3)                 | U05784   | Genes unknown fxn                         |
| 275 | ESTs similar to mouse ADP-ribosyltransferase 3                             | AI104393 | glycosylation                             |
| 276 | ESTs similar to human cysteine-rich motor neuron 1                         | AI233787 | neurogenesis                              |
| 277 | ESTs similar to human ataxin 2-binding protein 1                           | AA818804 | nucleic acid binding                      |
| 278 | ESTs unknown function                                                      | AI228484 | ESTs unknown function                     |
| 279 | isocitrate dehydrogenase 1 (NADP+), soluble                                | AA892314 | tricarboxylic acid cycle                  |
| 280 | ESTs unknown function                                                      | AI171103 | ESTs unknown function                     |
| 281 | ESTs highly similar to mouse B-cell receptor-associated protein 31         | AA944335 | immune response                           |
| 282 | ESTs similar to mouse phospholipase C-like 2                               | AI058656 | Genes unknown fxn                         |
| 283 | E-Tropomodulin                                                             | U59241   | cytoskeletal                              |
| 284 | ESTs unknown function                                                      | AA848948 | ESTs unknown function                     |
| 285 | cathepsin L                                                                | AI176595 | Protein degradation                       |
| 286 | ESTs unknown function                                                      | AA925744 | ESTs unknown function                     |
| 287 | ESTs unknown function                                                      | AA946029 | ESTs unknown function                     |
| 288 | ESTs weakly similar to mouse follistatin like mRNA                         | AI011457 | serine protease inhibitor                 |
| 289 | ESTs unknown function                                                      | AI171193 | ESTs unknown function                     |
| 290 | ESTs unknown function                                                      | AA850672 | ESTs unknown function                     |
| 291 | ESTs unknown function                                                      | AI176362 | ESTs unknown function                     |
| 292 | ESTs unknown function                                                      | AA891950 | ESTs unknown function                     |
| 293 | ESTs highly similar to mouse troponin C, fast skeletal                     | AI639532 | muscle contraction                        |
| 294 | serum/glucocorticoid regulated kinase                                      | L01624   | protein amino acid phosphorylation        |
| 295 | ESTs unknown function                                                      | AI105451 | ESTs unknown function                     |
| 296 | ESTs similar to mouse neuroepithelial cell transforming gene 1             | AI180187 | signal transduction                       |
| 297 | Glutamine synthetase (glutamate-ammonia ligase)                            | M91652   | amino acid metabolism                     |
| 298 | ESTs similar to mouse RNA polymerase II subunit 5 (RPB5)-mediating protein | AI234218 | transcription regulation                  |
| 299 | ESTs similar to mouse ankyrin repeat and SOCS box-containing protein 11    | AI011087 | Genes unknown fxn                         |
| 300 | fumarylacetoacetate hydrolase                                              | M77694   | amino acid metabolism                     |
| 301 | ESTs unknown function                                                      | AA818271 | ESTs unknown function                     |
| 302 | Glutamine synthetase (glutamate-ammonia ligase)                            | M91652   | amino acid metabolism                     |
| 303 | ESTs similar to mouse RW1 protein                                          | AA943110 | Genes unknown fxn                         |
| 304 | ESTs unknown function                                                      | AI234712 | ESTs unknown function                     |
| 305 | ESTs highly similar to rat myosin light chain kinase 2, skeletal muscle    | AA924075 | muscle contraction                        |
| 306 | Glutamine synthetase (glutamate-ammonia ligase)                            | AI232783 | amino acid metabolism                     |
| 307 | pyruvate carboxylase                                                       | U32314   | tricarboxylic acid cycle, gluconeogenesis |
| 308 | ESTs unknown function                                                      | AI172057 | ESTs unknown function                     |
| 309 | ESTs similar to human methylmalonyl CoA epimerase                          | AI172417 | Genes unknown fxn                         |
| 310 | ESTs similar to mouse kelch family protein Nd1                             | AA799539 | Genes unknown fxn                         |
| 311 | ESTs similar to mouse glutaryl-Coenzyme A dehydrogenase                    | AI105435 | Amino-acid metabolism                     |
| 312 | ESTs unknown function                                                      | AA859543 | ESTs unknown function                     |
| 313 | myosin, heavy polypeptide 4, skeletal muscle (MHC2B)                       | L24897   | muscle contraction                        |
| 314 | ESTs unknown function                                                      | AA858817 | ESTs unknown function                     |

|     |                                                                                               |          |                             |
|-----|-----------------------------------------------------------------------------------------------|----------|-----------------------------|
| 315 | ESTs unknown function                                                                         | AI171772 | ESTs unknown function       |
| 316 | insulin-like growth factor binding protein 3                                                  | M31837   | signaling                   |
| 317 | interleukin 15                                                                                | U69272   | immune response             |
| 318 | ESTs similar to mouse diacylglycerol O-acyltransferase 2                                      | AI045040 | lipid metabolism            |
| 319 | ESTs weakly similar to human p53 regulated PA26 nuclear protein                               | AI137579 | cell cycle                  |
| 320 | hypoxia-inducible factor 1-responsive gene, RTP801                                            | AI144692 | Genes unknown fxn           |
| 321 | serine protease inhibitor (spin2b)                                                            | M38566   | serine protease inhibitor   |
| 322 | branched chain aminotransferase 2, mitochondrial                                              | U68417   | amino acid metabolism       |
| 323 | ESTs unknown function                                                                         | AI070446 | ESTs unknown function       |
| 324 | ESTs unknown function                                                                         | AI227690 | ESTs unknown function       |
| 325 | ESTs similar to mouse glutathione transferase zeta 1 (maleylacetoacetate isomerase)           | AI169075 | amino acid metabolism       |
| 326 | Glutamine synthetase (glutamate-ammonia ligase)                                               | AA852004 | amino acid metabolism       |
| 327 | ESTs unknown function                                                                         | AI137344 | ESTs unknown function       |
| 328 | ESTs weakly similar to human transducin-like enhancer of split 1 (E(sp1) homolog, Drosophila) | AA875084 | developmental processes     |
| 329 | ESTs similar to mouse chemokine (C-X-C motif) ligand 14                                       | AA874803 | immune response             |
| 330 | type 2X myosin heavy chain mRNA, partial cds                                                  | S68736   | muscle contraction          |
| 331 | ESTs weakly similar to mouse D-dopachrome tautomerase                                         | AA945149 | melanin biosynthesis        |
| 332 | aldehyde oxidase (female form)                                                                | AA926200 | inflammatory response       |
| 333 | ESTs similar to human glutathione S-transferase theta 1                                       | AA819129 | glutathione transferase     |
| 334 | heat shock protein 70-1 (Hspa1a)                                                              | AA848563 | chaperone                   |
| 335 | sodium channel, voltage-gated, type 1, alpha polypeptide                                      | M22253   | ion transport               |
| 336 | cAMP responsive element modulator                                                             | S66024   | regulation of transcription |
| 337 | actin alpha cardiac 1                                                                         | X80130   | muscle contraction          |
| 338 | actin, alpha, cardiac                                                                         | AI104567 | muscle contraction          |
| 339 | ESTs similar to mouse enabled homolog (Drosophila)                                            | AI229412 | actin                       |
| 340 | actin, alpha, cardiac                                                                         | AA866452 | muscle contraction          |
| 341 | ESTs unknown function                                                                         | AI639060 | ESTs unknown function       |
| 342 | heat shock protein 70-1 (Hspa1a)                                                              | AA818604 | chaperone                   |
| 343 | ESTs highly similar to mouse enabled homolog (Drosophila)                                     | AA957653 | actin                       |
| 344 | actin alpha cardiac 1                                                                         | X80130   | muscle contraction          |
| 345 | ESTs similar to mouse enabled homolog (Drosophila)                                            | AI137553 | actin                       |
| 346 | ASM15 gene                                                                                    | X59864   | Genes unknown fxn           |
| 347 | ESTs unknown function                                                                         | AI172334 | ESTs unknown function       |
| 348 | ASM15 gene                                                                                    | X59864   | Genes unknown fxn           |
| 349 | cholinergic receptor, nicotinic, delta polypeptide                                            | X74835   | muscle contraction          |
| 350 | ESTs similar to rat tyrosine aminotransferase                                                 | AI178785 | tyrosine aminotransferase   |
| 351 | gnat-3 for gustducin                                                                          | X65747   | Genes unknown fxn           |
| 352 | ESTs weakly similar to human PTH-responsive osteosarcoma B1 protein                           | AI235250 | Genes unknown fxn           |
| 353 | guanine nucleotide binding protein, beta polypeptide 2                                        | AA817993 | signal transduction         |
| 354 | ESTs similar to mouse ankyrin repeat and SOCs box-containing protein 5                        | AI169831 | Genes unknown fxn           |

**Supplementary Figure 1.** A condensed view of the hierarchical cluster that resulted from analyzing the 354 significant age-atrophy interactions presented in Table 3 of Supplementary Material are shown. Clusters are based on normalized signal data, by normalizing the maximum value of the four group means, then each of the three remaining means being scaled to the maximal mean. This methodology allowed genes of differing abundances to be normalized to the same percentage scale with a resultant ability to cluster genes of similar expression patterns.

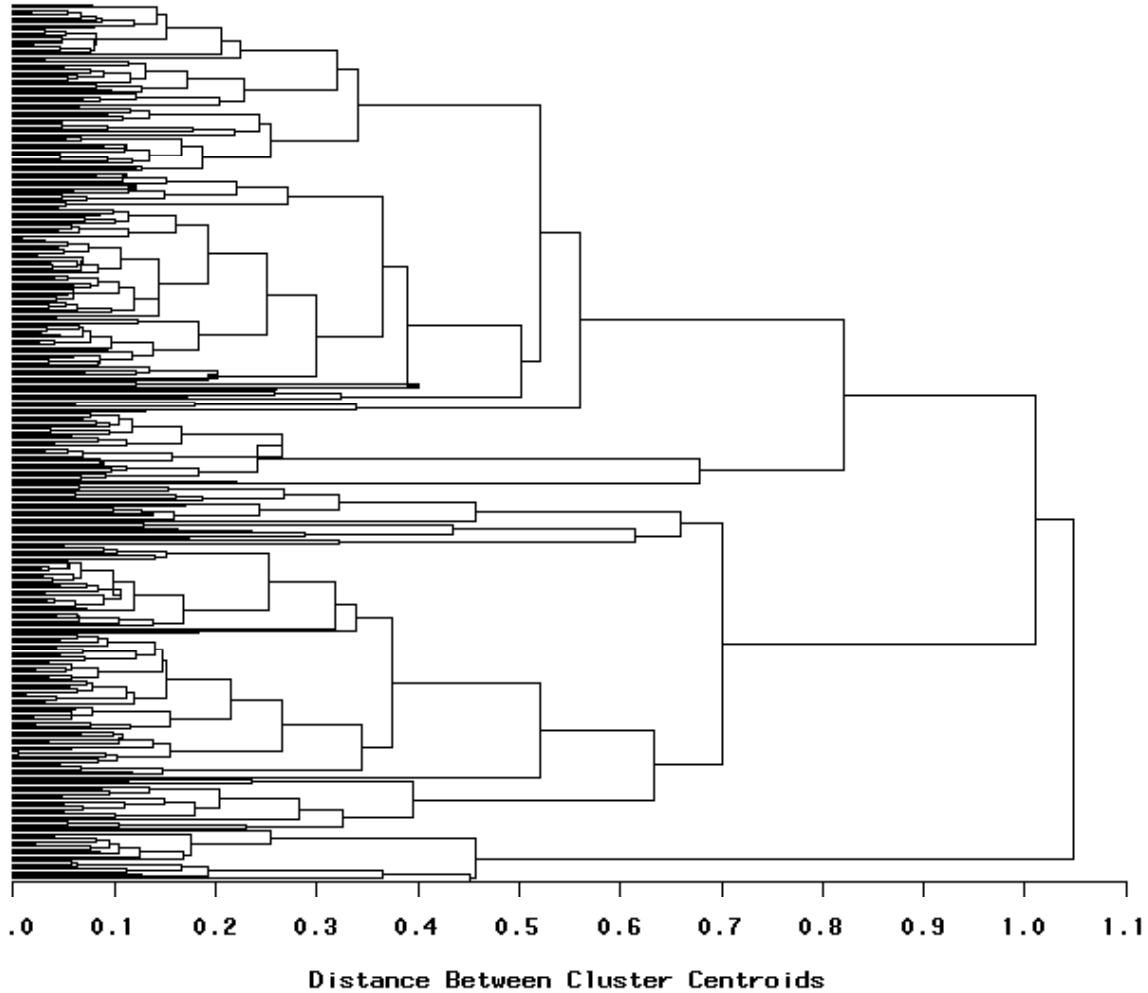



**Supplementary Figure 2.** Age-atrophy interactions consisted of four major graphical patterns illustrated in A-D. A) Illustrates the graphical phenotype when probe sets in the young soleus muscle show a greater decrease in response to immobilization than does the old. B) Shows the pattern of expression when old levels are decreased more than young with atrophy. C) Demonstrates those probe sets where young levels are elevated more so than old. D) Displays the pattern of response when transcript levels are greater in old than young. The y-axis is in arbitrary units, as these graphs are illustrations of the major age-atrophy interactions expression patterns observed, not actual data.

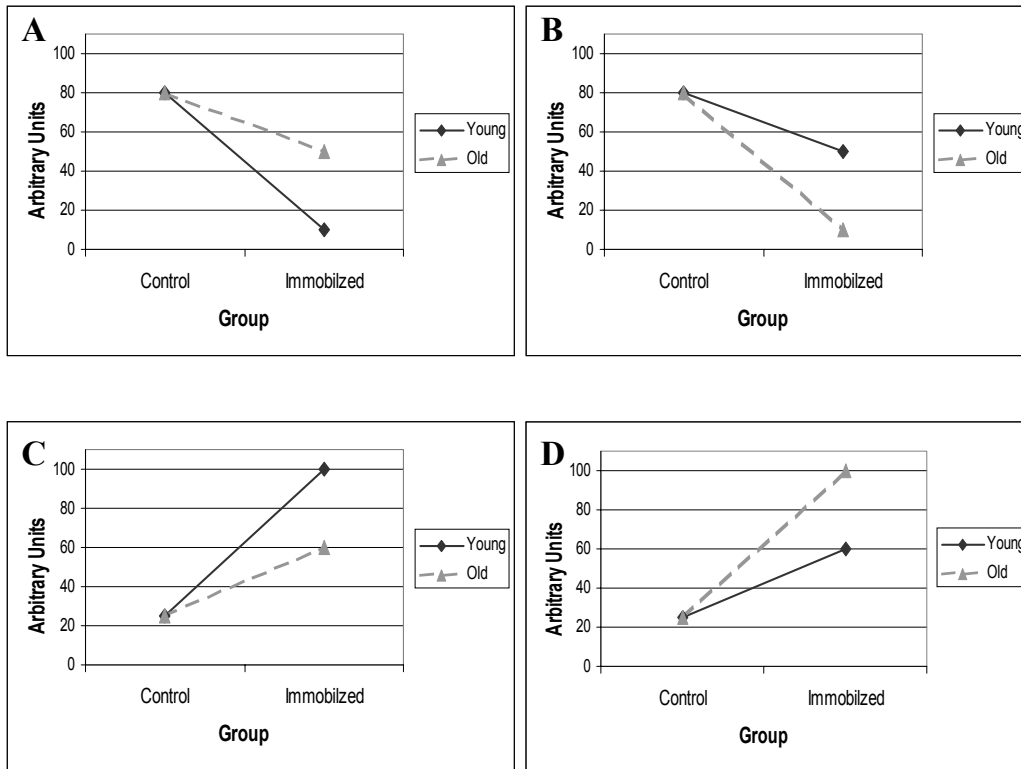

**Supplementary Figure 3.** A) A comparison MHC IIb fold changes in expression with age and atrophy from microarray and real-time PCR analyses. B) Contrasts the fold differences in expression for MHC IIx observed with microarray and real-time PCR analyses.

A.

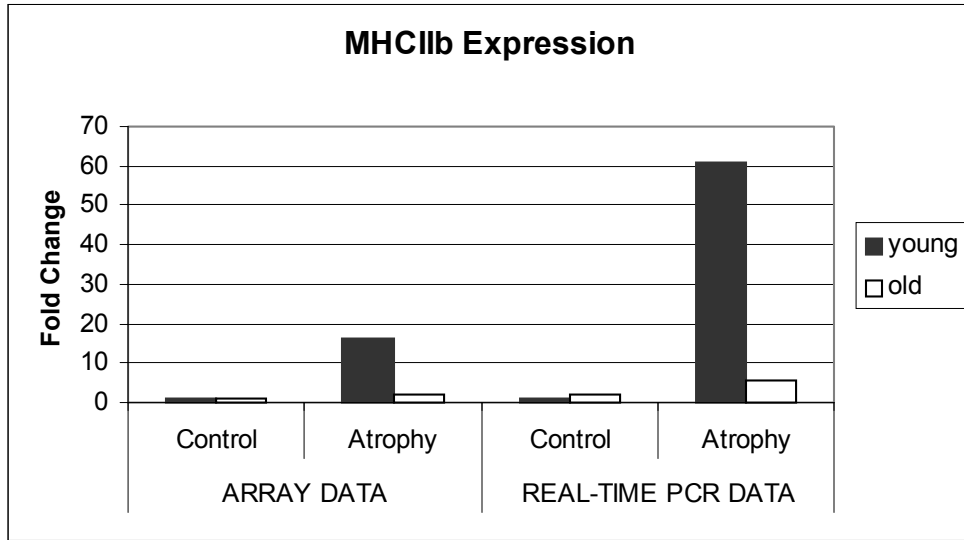

B.

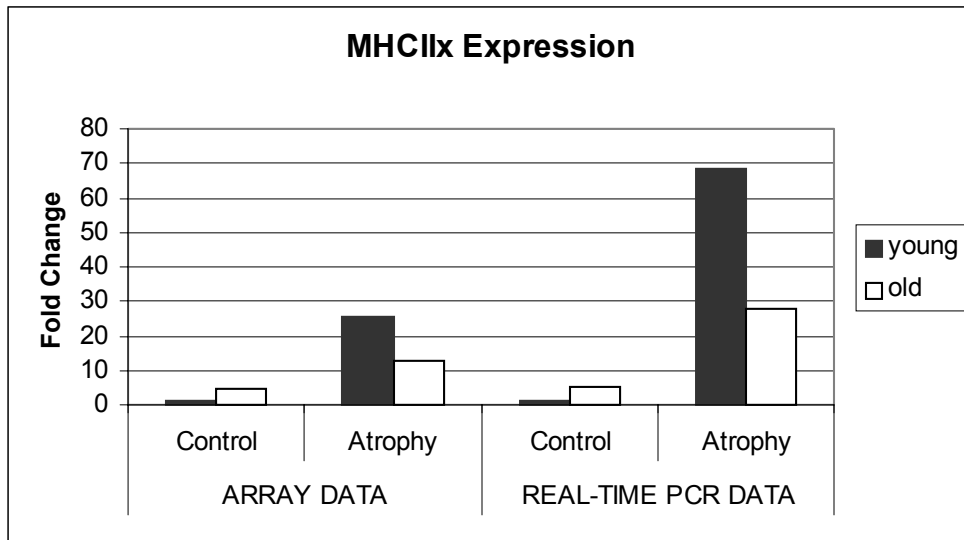

Supplement: jphysiol_2003.047233_1.pdf [file jphysiol_2003.047233_1.pdf]
